# Supplementary material for: Early antibiotic use and incidence of necrotising enterocolitis in very preterm infants: a protocol for a UK based observational study using routinely recorded data
Source: PubMed Central journal article supplement — BMJ Open. 2022 Nov 15;12(11):e065934. doi: 10.1136/bmjopen-2022-065934 (PMC9667987; doi:10.1136/bmjopen-2022-065934), 2022-11-15
Supplement: bmjopen-2022-065934.draft_revisions.pdf [file bmjopen-2022-065934.draft_revisions.pdf]

# BMJ Open

BMJ Open is committed to open peer review. As part of this commitment we make the peer review history of every article we publish publicly available.

When an article is published we post the peer reviewers' comments and the authors' responses online. We also post the versions of the paper that were used during peer review. These are the versions that the peer review comments apply to.

The versions of the paper that follow are the versions that were submitted during the peer review process. They are not the versions of record or the final published versions. They should not be cited or distributed as the published version of this manuscript.

BMJ Open is an open access journal and the full, final, typeset and author-corrected version of record of the manuscript is available on our site with no access controls, subscription charges or pay-per-view fees (<http://bmjopen.bmj.com>).

If you have any questions on BMJ Open's open peer review process please email [info.bmjopen@bmj.com](mailto:info.bmjopen@bmj.com)

# BMJ Open

## Early antibiotic use and incidence of necrotising enterocolitis in very preterm infants: A UK based observational study using routinely recorded data

|                               |                                                                                                                                                                                                                                                                                                                                                                                                                                                                                                                                                                                                                                                                                                                                                                                                                                                    |
|-------------------------------|----------------------------------------------------------------------------------------------------------------------------------------------------------------------------------------------------------------------------------------------------------------------------------------------------------------------------------------------------------------------------------------------------------------------------------------------------------------------------------------------------------------------------------------------------------------------------------------------------------------------------------------------------------------------------------------------------------------------------------------------------------------------------------------------------------------------------------------------------|
| Journal:                      | <i>BMJ Open</i>                                                                                                                                                                                                                                                                                                                                                                                                                                                                                                                                                                                                                                                                                                                                                                                                                                    |
| Manuscript ID                 | bmjopen-2022-065934                                                                                                                                                                                                                                                                                                                                                                                                                                                                                                                                                                                                                                                                                                                                                                                                                                |
| Article Type:                 | Protocol                                                                                                                                                                                                                                                                                                                                                                                                                                                                                                                                                                                                                                                                                                                                                                                                                                           |
| Date Submitted by the Author: | 22-Jun-2022                                                                                                                                                                                                                                                                                                                                                                                                                                                                                                                                                                                                                                                                                                                                                                                                                                        |
| Complete List of Authors:     | Shen, Rene; University of Copenhagen, Comparative Pediatrics and Nutrition<br>Embleton, Nicholas ; Newcastle Upon Tyne Hospitals NHS Foundation Trust, Neonatology ; Newcastle University Faculty of Medical Sciences, Population Health Sciences<br>Lyng Forman, Julie ; University of Copenhagen, Biostatistics<br>Gale, Chris; Imperial College London, Neonatal Medicine, School of Public Health<br>Griesen, Gorm; Odense University Hospital, Neonatology<br>Sangild, Per; University of Copenhagen, Comparative Pediatrics and Nutrition; Rigshospitalet, Department of Neonatology<br>Uthaya, Sabita; Imperial College London, Faculty of Medicine<br>Berrington, Janet; Newcastle Upon Tyne Hospitals NHS Foundation Trust, Neonatology ; Newcastle University Faculty of Medical Sciences, Clinical and Translational Research Institute |
| Keywords:                     | Neonatal intensive & critical care < INTENSIVE & CRITICAL CARE, Paediatric gastroenterology < GASTROENTEROLOGY, BACTERIOLOGY                                                                                                                                                                                                                                                                                                                                                                                                                                                                                                                                                                                                                                                                                                                       |
|                               |                                                                                                                                                                                                                                                                                                                                                                                                                                                                                                                                                                                                                                                                                                                                                                                                                                                    |

SCHOLARONE™  
Manuscripts

1  
2  
3 **Early antibiotic use and incidence of necrotising enterocolitis in very preterm infants: A UK**  
4 **based observational study using routinely recorded data**  
5  
6

7  
8 René Shen<sup>1</sup>, Nicholas Embleton<sup>2,3</sup>, Julie Forman<sup>4</sup>, Chris Gale<sup>5</sup>, Gorm Greisen<sup>6</sup>, Per Torp  
9 Sangild<sup>1,6,7</sup>, Sabita Uthaya<sup>8</sup>, Janet Berrington<sup>2,9</sup>  
10  
11

12  
13 1 Comparative Pediatrics and Nutrition, Faculty of Health and Medical Sciences, University  
14 of Copenhagen  
15

16  
17 2 Neonatal department, Newcastle upon Tyne Hospitals NHS Foundation Trust, Richardson  
18 Road, Newcastle, NE7 7DN, UK  
19

20  
21 3 . Population Health Sciences Institute, Newcastle University, Newcastle upon Tyne, UK  
22

23  
24 4 Section of Biostatistics, Dept. of Public Health, University of Copenhagen  
25

26  
27 5 School of Public Health, Faculty of Medicine, Chelsea and Westminster Hospital campus,  
28 Imperial College London  
29

30  
31 6 Dept. of Neonatology, Copenhagen University Hospital  
32

33  
34 7 Dept. of Pediatrics, Odense University Hospital, Odense, Denmark  
35

36  
37 8 School of Public Health, Faculty of Medicine, Chelsea and Westminster Hospital campus,  
38 Imperial College London  
39

40  
41 9 Clinical and Translational Research Institute, University of Newcastle, UK  
42  
43  
44  
45

46 Corresponding author Janet Berrington, Neonatal department, Newcastle upon Tyne  
47 Hospitals NHS Foundation Trust, Richardson Road, Newcastle, NE7 7DN, UK email:  
48 [janet.berrington1@nhs.net](mailto:janet.berrington1@nhs.net)  
49  
50  
51

52  
53  
54 **Word count:** 2631

55  
56  
57 **Keywords:** neonatal intensive and critical care, paediatric gastroenterology, bacteriology  
58

59 **Trial registration number:** ISRCTN Pending  
60

## ABSTRACT

### Introduction

Necrotising enterocolitis (NEC) remains a major contributor to preterm mortality and morbidity. Prolonged duration of antibiotic therapy after delivery is associated with later NEC development but recent evidence suggests that absence of antibiotic treatment after delivery may also increase NEC risk. We will explore this controversy using a large pre-existing dataset of preterm infants in the United Kingdom (UK).

### Methods and analysis

This is a retrospective cohort study using routine data from the UK National Neonatal Research Database (NNRD) for infants born 01/01/2012 to 31/12/2020. Eligible infants will be <32 weeks gestation, alive on day three. The primary outcome is development of severe NEC, compared in infants receiving early antibiotics (days 1-2 after birth) and those not. Subgroup analysis on duration of early antibiotic exposure will also occur. Secondary outcomes are: late onset sepsis (LOS), total antibiotic use, pre-discharge mortality, retinopathy of prematurity (ROP), intraventricular haemorrhage (IVH), bronchopulmonary dysplasia (BPD), focal intestinal perforation and any abdominal surgery. To address competing risks, incidence of death before day 7, 14 and 28 will be analysed. We will perform both logistic regression and propensity score matched analyses. Statistical analyses will be guided by understanding of NEC risk factors, exposures and outcome presented in a causal diagram. These covariates include but are not limited to gestational age, birth weight, small for gestational age (SGA), sex, ethnicity, delivery mode, delivery without labour, Apgar score, early feeding and probiotic use. Sensitivity analyses of alternate NEC definitions, specific antibiotics and time of initiation will occur.

### Ethics and dissemination

1  
2  
3 We will use de-identified data from NNRD, which holds permissions for the original data,  
4  
5 from which parents can opt out and seek study- specific Research Ethics approval. The  
6  
7 results will help to determine optimal use of early antibiotics for very preterm infants.  
8  
9  
10  
11  
12

## 13 **ARTICLE SUMMARY**

### 14 **Strengths and limitations of the study**

#### 17 **Strengths:**

- 18 • Use of the NNRD gives access to a very large dataset of preterm infants
- 19
- 20 • The primary outcome (NEC) and the many contributory covariates are routinely
- 21 recorded in this dataset
- 22
- 23 • Analysis by both regression and using propensity matching optimises learning from
- 24 this large dataset
- 25
- 26
- 27
- 28
- 29
- 30
- 31

#### 32 **Limitations:**

- 33 • Data entry may not always be as accurate as that collected specifically within a trial
- 34
- 35 • The diagnosis of NEC has no gold standard to allow standardisation across units
- 36
- 37
- 38
- 39
- 40
- 41
- 42
- 43
- 44
- 45
- 46
- 47
- 48
- 49
- 50
- 51
- 52
- 53
- 54
- 55
- 56
- 57
- 58
- 59
- 60

## INTRODUCTION

1  
2  
3  
4  
5  
6  
7  
8  
9  
10  
11  
12  
13  
14  
15  
16  
17  
18  
19  
20  
21  
22  
23  
24  
25  
26  
27  
28  
29  
30  
31  
32  
33  
34  
35  
36  
37  
38  
39  
40  
41  
42  
43  
44  
45  
46  
47  
48  
49  
50  
51  
52  
53  
54  
55  
56  
57  
58  
59  
60

Around 3% of all babies are born very preterm (VPT, <32 weeks' gestation) and they require prolonged hospital stay, commonly including intensive care. Survival in these VPT infants (VPTI) has increased dramatically in recent years, but death is still common (~10% overall) as are life-long physical and cognitive impairment.[1] In the UK around 10,000 VPTI are born every year, representing an annual cost to the NHS of ~£3 billion.[2] The commonest cause of death or serious illness in preterm infants after the first few days are gut or infectious complications such as necrotising enterocolitis (NEC) or late onset sepsis (LOS).[3] Although knowledge around NEC, and preventive practices such as use of mothers own milk (MOM), donor human milk (DHM) and probiotics are increasing, there has been little reduction in NEC incidence over recent years[4,5], and mechanisms underlying the development of NEC are poorly understood. Antibiotic use as part of neonatal intensive care is common, particularly immediately after birth when infection is implicated in preterm delivery – studies show more than half of infants weighing <1000g routinely received more than 5 days antibiotics at birth[6]. Antibiotic use in VPTI has been implicated in NEC development in several ways. Studies show an increase in NEC incidence with increased duration of empirical early antibiotics[7,8] and alteration of the gut microbiota (dysbiosis) has been mechanistically linked to NEC development [9]. However recent observational data from 13 NICUs from 5 continents (n=2831) identified that NEC incidence was higher in infants who did not receive empirical antibiotics early after birth, despite higher gestational age, compared to those receiving them (OR: 1.8 (95% CI 1.1-2.9), with even higher odds ratio when adjusted for relevant confounders (OR: 4.0 (95% CI 2.1-7.3)) [10]. In contrast, results from a very recent study in preterm infants with low risk of infection shows opposite trends of lower odds in those not treated, but is underpowered for NEC as outcome (n=641, OR:0.7 (95%CI 0.3-1.5))[11]. There is increasing focus on antibiotic stewardship, and it can be

1  
2  
3 expected that the proportion of infants that are not given antibiotics after preterm birth will  
4  
5 increase in the coming years. Therefore, it is important to know if lower early usage of  
6  
7 antibiotics will increase the incidence of NEC. While there have been calls for a trial of  
8  
9 routine early antibiotic treatment[12] in very preterm babies, and a single trial has so far  
10  
11 attempted to do this, there are important logistical difficulties[13] with such an approach.

12  
13  
14 The National Neonatal Research Database (NNRD) provides a large, population level dataset  
15  
16 that can be used to further test the hypothesis that early empiric antibiotic treatment reduces  
17  
18 the incidence of NEC in preterm infants, and allows adjustment for confounding through the  
19  
20 large number of patient level covariates recorded in the NNRD.  
21  
22

## 23 24 25 **METHODS AND ANALYSIS**

### 26 27 **Design**

28  
29 Retrospective cohort study using routinely recorded clinical data held in the NNRD.

### 30 31 **Data source**

32  
33 NNRD holds data from all infants admitted to National Health Service (NHS) neonatal units  
34  
35 in England and Wales from around 90,000 infants annually. Neonatal units in England and  
36  
37 Wales have contributed data since 2012. Data are entered by contributing units to a point-of-  
38  
39 care electronic dataset and a defined dataset is extracted by NNRD. Data is extracted  
40  
41 quarterly and sent to the Neonatal Data Analysis Unit (NDAU), based at Imperial College,  
42  
43 London [14]. The data includes variables pertinent to the present analysis, including  
44  
45 demographics, exposure and outcome variables.  
46  
47  
48  
49

### 50 51 **Eligibility criteria**

52  
53 Eligible infants must have been born at <32 weeks gestation, be cared for in a unit  
54  
55 contributing data to NNRD, and be alive at day 3. Infants will be excluded if they have a  
56  
57 known severe congenital or gastro-intestinal anomaly (excluding the presence of a patent  
58  
59  
60

ductus arteriosus (Supplementary Tables 1 and 2) or have had abdominal surgery before day

3.

### **Time period**

Infants born between 01/01/2012 and 31/12/2020 will be included.

### **Setting**

UK neonatal units in England and Wales contributing to NNRD.

### **Definitions**

Exposure (primary)

Receipt of any intravenous antibiotic drug (Appendix 1) for any of the first 2 days after birth.

Comparator: Did not receive any antibiotics for any of the first 2 days after birth.

Primary outcomes

Severe NEC resulting in death or surgery as defined by Battersby[4].

Secondary outcomes

Secondary outcomes for analysis are the effects of early antibiotic exposure on

1. Late onset sepsis (blood stream or cerebrospinal fluid (CSF) confirmed pure growth in culture (National Neonatal Audit Programme (NNAP) definition) after first 3 days and/or treatment with 5 days of antibiotics and a concurrent diagnosis of infection after the first 3 days)
2. Total antibiotic use (number of days with any treatment of antibiotics during admission)
3. Length of stay (postnatal age at discharge or death)
4. Time to reach full feeding (first day of 3 consecutive days where parenteral nutrition or intravenous fluid are not recorded)



1  
2  
3 5. Growth (change in standard deviation score between birth and 36 weeks and  
4 discharge)  
5  
6

7 Further, we will analyse effects on some relevant adverse outcomes:  
8

- 9  
10 6. Total pre-discharge mortality  
11  
12 7. Death prior to day 7, day 14, day 28  
13  
14 8. Bronchopulmonary dysplasia (respiratory support given at 36 weeks)  
15  
16 9. Retinopathy of prematurity (ROP) (received treatment for ROP, according to NNRD  
17 definition)  
18  
19 10. Brain injury (Intraventricular haemorrhage grade 3 or above or cystic leucomalacia  
20 diagnoses recorded)  
21  
22 11. Need for surgical procedures (Appendix 1)  
23  
24  
25  
26  
27

28 Comparison of different durations of early antibiotic exposure will be performed based on the  
29 following categories:  
30  
31

- 32  
33 • Antibiotic duration no longer than 3 days  
34  
35 • Antibiotic duration 3-5 days  
36  
37 • Antibiotic duration longer than 5 days without positive culture (blood stream or CSF  
38 confirmed pure growth in culture (NNAP definition) in the first 3 days.  
39  
40

41 For the above analyses, infants with a positive blood or CSF culture in the first 3 days will be  
42 excluded.  
43  
44

45 A specific subgroup of interest are the infants that are considered to have low risk of early  
46 onset sepsis (EOS), specified as fulfilling all of the following prenatal characteristics: no  
47 premature rupture of membranes (PROM), no labour and no (suspected) chorioamnionitis.  
48  
49

50 Additional subgroup analyses will be performed for infants with gestation age <28 weeks and  
51 birth weight <1000g.  
52  
53

## 54 **Sample size**

55  
56  
57  
58  
59  
60

Observed NEC incidence noted in a previous study on a total 2831 infants from five different continents, using criteria for NEC diagnosis in keeping with pragmatically defined NEC, was 9% when early antibiotic treatment was absent and 4% when antibiotic was provided in the first three days[10]. We hypothesise to find a similar antibiotic related proportional reduction in incidence of severe NEC in this study, based on data collected over nine years (2012-2020) from around 45,000 infants. In an earlier report based on a NNRD subgroup, the incidence of severe NEC was 3.2% for infants born <32 weeks[4]. The cohort event estimate is 1440 cases.

### Data required

Appendix 1 carries the full list of variables considered relevant for extraction from NNRD including definitions of constructed items/variables.

### Potential confounders

Several covariates are relevant to include in the analysis as potential confounders. We will take a hypothesis driven approach to the selection of covariates. A causal diagram (Directed Acyclic Graphs, DAG, Figure 1) is drawn and analysed with relevant variables and potential confounders related to antibiotic exposure and NEC outcome. Nodes and edges are determined based on literature and subject matter knowledge. The selected covariates are considered to reflect conditions prior to the defined exposure (i.e. within day 1-2 after birth). For several variables, only proxies will be available (Table 1).

Table 1 Overview of variables

| Variable                   | Class/type | Expected availability in NNRD | Importance for effect estimation                                       |
|----------------------------|------------|-------------------------------|------------------------------------------------------------------------|
| AB                         | Exposure   | Available (definable)         |                                                                        |
| NEC                        | Outcome    | Available (definable)         |                                                                        |
| Site                       | Confounder | Available                     | Minimal sufficient adjustment set to model the direct and total effect |
| BW                         | Confounder | Available                     |                                                                        |
| Delivery mode <sup>1</sup> | Confounder | Available (categories)        |                                                                        |

|                             |                                  |                                          |                                        |
|-----------------------------|----------------------------------|------------------------------------------|----------------------------------------|
| Clinical signs <sup>2</sup> | Confounder                       | Available (proxies)                      | of AB on NEC according to proposed DAG |
| Maternal infection          | Confounder                       | Available (clinical)                     |                                        |
| GA                          | Confounder                       | Available                                |                                        |
| IUGR                        | Confounder                       | Available (definable)                    |                                        |
| Fetal flow                  | Ancestor of Exp & Out (indirect) | Unobserved                               | Blocked by IUGR and delivery mode      |
| Ischemia                    | Ancestor of Exp & Out (indirect) | Unobserved                               | Blocked by Clinical Signs              |
| Preeclampsia                | Ancestor of Exp & Out (indirect) | Available                                | Blocked by delivery mode               |
| Antenatal steroids          | Ancestor of Outcome              | Available                                | Blocked by clinical signs              |
| Sepsis                      | Ancestor of Exp & Out (indirect) | Available (definable/proxy)              | Blocked by clinical signs              |
| PDA                         | Ancestor of Exp & Out (indirect) | Available (definable)                    | Blocked by clinical signs              |
| Umbilical catheters         | Ancestor of Exp & Out (indirect) | Available                                | Blocked by clinical signs              |
| Anaemia/transfusion         | Ancestor of Exp & Out (indirect) | Available (proxy, i.e. transfusions)     | Blocked by clinical signs              |
| Sex                         | Ancestor of Outcome              | Available                                | Precision variable                     |
| Ethnicity                   | Ancestor of Outcome              | Available                                | Precision variable                     |
| Multiparity                 | Ancestor of Outcome              | Available                                | Precision variable                     |
| Smoking                     | Ancestor of Outcome              | Available                                | Precision variable                     |
| GDM                         | Ancestor of Outcome              | Available                                | Precision variable                     |
| Socioeconomic status        | Ancestor of Outcome              | Available (proxy i.e. deprivation score) | Precision variable                     |
| Maternal antibiotics        | Ancestor of Outcome              | Available (intrapartum)                  | Precision variable                     |
| Dyscolonisation             | Ancestor of Outcome              | Unobserved                               | Precision variable                     |
| Assisted ventilation        | Ancestor of Outcome              | Available                                | Precision variable                     |
| Surfactant therapy          | Ancestor of Outcome              | Available                                | Precision variable                     |
| Formula feeding             | Ancestor of Outcome              | Available                                | Precision variable                     |
| Feeding initiation          | Ancestor of Outcome              | Available                                | Precision variable                     |
| Probiotic initiation        | Ancestor of Outcome              | Available                                | Precision variable                     |

<sup>1</sup>Specification of different clinical conditions with important impact on decision to treat with AB, categorized as: Vaginal AND Spontaneous, Vaginal AND Induced, Emergency caesarean AND labour, Emergency caesarean AND no labour, Elective caesarean AND labour, Elective caesarean AND no labour.

<sup>2</sup>Respiratory/circulatory/unspecific signs/symptoms/parameters used clinical assessment and decision making related to decision to treat with antibiotics

## STATISTICAL ANALYSES

### Primary analyses

Previous work using logistic regression included the following covariates in the model for the hypothesis: NICU (random effect) + GA + birthweight+ sex+ delivery mode + APGAR scores + antenatal steroids + feeding type. We aim to test the hypothesis with data from NNRD using the same regression model as used in the previous work (variables 1-8 in Table 2) and also an expanded regression model with inclusion of all potentially relevant variables (Table 2). Results will be presented as adjusted odds ratios with 97.5% confidence intervals and Bonferroni-adjusted p-values (unadjusted p-values multiplied by 2). To better quantify the causal effect of antibiotics, standardised risk differences with 97.5% bootstrap confidence intervals will also be presented.

### Priority of covariates

Covariates to include in the model are listed and prioritised in Table 2. Confounders are ranked higher based on importance, i.e. variables which arguably have effect on both outcome (NEC) as well as exposure (decision to start antibiotic treatment, which relates to infection risk/concern). Assessment of covariate importance is based on subject matter knowledge and scientific literature (references in Table 2). For several variables, it is unclear whether there is a relevant effect on NEC and a conservative approach is employed to include potential confounders in the model[15]. Similar considerations apply for assessment of variables with relevant effect on decision to treat with early antibiotics. These variables will be included in the regression for propensity score calculation and subsequent matching. For highly similar variables, the lower priority or quality variables may be omitted if necessary (e.g multi-collinearity issues). Variables with very low quality (e.g. too many missing values)

will be omitted. For categorical variables, groups with very few observations will be removed (e.g. separation issues). Estimated effects of each variable included in the model included will be reported. Based on the recommendation to have at least ten events per variable[16], with the event estimate approximately 1500 cases, this will provide 150 degrees of freedom in the model. Based on the proposed covariates listed in Table 2, the required degrees of freedom for analysis is 108. If the actual number of cases in the obtained dataset is much lower than expected, thus providing insufficient degrees of freedom, covariates may be excluded in reverse order of priority. See detailed specifications of listed covariates/items in Appendix 1.

Table 2. Priority of covariates to include in model based on DAG and availability from NNRD.

|    |                                               | Influence on NEC[17–19] | Influence on AB-start (decision to treat based on sepsis risk)[20,21] | Potential repetition/redundancy    | Relation to node in DAG     | Structure (continuous or number of categories)                                                                                                                          |
|----|-----------------------------------------------|-------------------------|-----------------------------------------------------------------------|------------------------------------|-----------------------------|-------------------------------------------------------------------------------------------------------------------------------------------------------------------------|
| 1  | NICU/site                                     | YES                     | YES                                                                   |                                    | Site                        | Random                                                                                                                                                                  |
| 2  | GA                                            | YES                     | YES                                                                   |                                    | GA                          | Continuous                                                                                                                                                              |
| 3  | BW                                            | YES                     | YES                                                                   |                                    | BW                          | Continuous                                                                                                                                                              |
| 4  | SEX                                           | YES                     | No?                                                                   |                                    | Sex                         | Dichotomous                                                                                                                                                             |
| 5  | APGAR5                                        | Yes                     | Yes                                                                   |                                    | Clinical signs              | 11 categories (0-10)                                                                                                                                                    |
| 6  | Delivery mode + expanded (6 categories)       | Yes                     | YES                                                                   |                                    | Delivery mode and type      | 6 (see table 1)                                                                                                                                                         |
| 7  | Maternal antenatal steroids                   | Yes                     | Yes? (indicator of fetal status/delivery conditions)                  |                                    | Antenatal steroids          | None / Incomplete / complete                                                                                                                                            |
| 8  | Feeding first day                             | Yes                     | No                                                                    |                                    | Feeding                     | 1: Enteral feeding on day 1-2, human milk only<br>2: Enteral feeding on day 1-2, formula only<br>3: Enteral feeding on day 1-2, mix<br>3: No enteral feeding on day 1-2 |
| 9  | IUGR                                          | Yes                     | Yes                                                                   |                                    | IUGR                        | Dichotomous (less than -2SDS)                                                                                                                                           |
| 10 | APGAR1                                        | Yes                     | Yes?                                                                  |                                    |                             | 11 categories (0-10)                                                                                                                                                    |
| 11 | APGAR10                                       | Yes                     | Yes                                                                   |                                    | Clinical signs              | 11 categories (0-10)                                                                                                                                                    |
| 12 | EOS                                           | Yes?                    | No                                                                    |                                    | Sepsis                      | Dichotomous                                                                                                                                                             |
| 13 | Birth year (epoch)                            | Yes                     | Yes                                                                   |                                    | (similar to site/standards) | 4-5                                                                                                                                                                     |
| 14 | Transfer on first day                         | Yes                     | Yes                                                                   |                                    | Site/outborn                | Dichotomous                                                                                                                                                             |
| 15 | Level of initial unit                         | Yes                     | Yes                                                                   |                                    | Site                        | Dichotomous                                                                                                                                                             |
| 16 | Maternal Preeclampsia requiring preterm birth | Yes?                    | Yes                                                                   |                                    | Preeclampsia                | Dichotomous                                                                                                                                                             |
| 17 | Prolonged ROM                                 | Yes?                    | YES                                                                   |                                    | Maternal infection          | Dichotomous                                                                                                                                                             |
| 18 | Maternal suspected chorioamnionitis           | Yes?                    | YES                                                                   | Defined by antibiotics and pyrexia | Maternal infection          | Dichotomous                                                                                                                                                             |
| 19 | Intrapartum antibiotics                       | Yes?                    | YES (in relation to chorioamnionitis)                                 |                                    | Maternal antibiotics        | Dichotomous                                                                                                                                                             |
| 20 | Maternal pyrexia                              | Yes?                    | YES (untreated chorioamnionitis)                                      |                                    | Maternal infection          | Dichotomous                                                                                                                                                             |
| 21 | Maternal GBS                                  | Yes?                    | YES                                                                   |                                    | Maternal infection          | Dichotomous                                                                                                                                                             |
| 22 | Umbilical cord pH                             | Yes                     | Yes                                                                   |                                    | Clinical signs              | Dichotomous: <7.00 yes or no                                                                                                                                            |
| 23 | Umbilical cord lactate                        | Yes                     | Yes                                                                   | Resembles pH                       | Clinical signs              | Cont/ Di/tri?                                                                                                                                                           |
| 24 | Base excess 12h worst                         | Yes                     | Yes                                                                   |                                    | Clinical signs              | Dichotomous: < -5 yes/no                                                                                                                                                |
| 25 | Umbilical cord base excess                    | Yes                     | Yes                                                                   | Resembles BE 12h worst             | Clinical signs              | Dichotomous: < -5 yes/no                                                                                                                                                |

|    |                                       |          |                                 |                         |                      |                                       |
|----|---------------------------------------|----------|---------------------------------|-------------------------|----------------------|---------------------------------------|
| 26 | Blood transfusion day 1-2             | Yes      | Yes?                            |                         | Anemia               | Dichotomous                           |
| 27 | Chest compressions                    | Yes      | Yes?                            |                         | Clinical signs       | Dichotomous                           |
| 28 | Resuscitation drugs at delivery       | Yes      | Yes?                            |                         | Clinical signs       | Dichotomous                           |
| 29 | Ventilation at delivery               | Yes?     | Yes? (clinical status at birth) |                         | Assisted ventilation | Dichotomous                           |
| 30 | Spontaneous respiration time          | Yes?     | Yes?                            |                         | Clinical signs       | 3 categories: <1 min, 1-5 min, >5 min |
| 31 | Admission temp                        | Yes      | Yes?                            |                         | Clinical signs       | 3 categories: <36.5, 36.5-37.5, >37.5 |
| 32 | Admission oxygen SAT                  | Yes      | Yes                             |                         | Clinical signs       | 3 categories: >94, 90-94, <90         |
| 33 | Inotropes on first day                | Yes      | Yes?                            |                         | Clinical signs       | Dichotomous                           |
| 34 | Admission mean BP                     | Yes?     | Yes/no?                         | Resembles inotropes     | Clinical signs       | Dichotomous: below GA yes/no          |
| 35 | Ethnicity                             | Yes      | Yes? (risk of inf)              |                         | Ethnicity            | 4 categories as suggested in appendix |
| 36 | Maternal deprivation score            | Yes?     | Yes? (risk of inf)              |                         | SES                  | Deprivation centiles?                 |
| 37 | Intubation first day                  | ?        | Yes?                            |                         | Assisted ventilation | Dichotomous                           |
| 38 | Intubation at delivery                | ?        | Yes?                            | Resembles intubation d1 | Assisted ventilation | Dichotomous                           |
| 39 | Surfactant first day                  | Yes?     | Yes?                            |                         | Surfactant therapy   | Dichotomous                           |
| 40 | Surfactant at delivery                | ?        | Yes?                            | Resembles intubation d1 | Surfactant therapy   | Dichotomous                           |
| 41 | Time of cord clamp                    | Yes/No?? | Yes? (clinical status at birth) |                         | Clinical signs       | Dichotomous: >60 seconds yes/no       |
| 42 | Probiotics                            | Yes      | No                              |                         | Probiotic initiation | Dichotomous                           |
| 43 | PDA identified day 1-2                | Yes      | No                              |                         | PDA                  | Dichotomous                           |
| 44 | PDA treatment day 1-2                 | Yes      | No                              |                         | PDA                  | Dichotomous                           |
| 45 | Multiplicity                          | ?        | No?                             |                         | Multiplicity         | Dichotomous                           |
| 46 | Smoking                               | Yes?     | No?                             |                         | Smoking              | Dichotomous                           |
| 47 | Parity                                | ?        | No?                             |                         | Parity               | Dichotomous                           |
| 48 | Umbilical catheters                   | Yes?     | No                              |                         | Umbilical catheters  | Dichotomous                           |
| 49 | Parenteral nutrition d1-2             | ?        | ?                               |                         |                      | Dichotomous                           |
| 50 | Admission heart rate                  | ?        | ?                               |                         | Clinical signs       | 3 categories: >200, 100-200, <100     |
| 51 | Maternal antenatal magnesium sulphate | No?      | Yes/no ?                        | Resembles preeclampsia  | Preeclampsia         | Dichotomous                           |
| 52 | Maternal gestational hypertension     | No?      | No                              |                         |                      | Dichotomous                           |
| 53 | Maternal diabetes                     | No?      | No                              |                         | GDM                  | Dichotomous                           |

## Sensitivity analyses

The following sensitivity analyses will be performed:

Early antibiotic exposure only with ampicillin or penicillin plus gentamicin, early antibiotic exposure defined by other timings after birth (later initiation and lasting until 4-6 days after birth) and alternative methods for diagnosing NEC (as standards for NEC diagnosis are unclear). For the latter analyses, we will define and re-analyse NEC diagnosis as ‘pragmatic NEC’ (5 days of nil by mouth and antibiotics and a diagnostic code of NEC) and NEC including focal intestinal perforation diagnosis (FIP). This condition is sometimes difficult to separate from NEC. We will also record infants with laparotomy- confirmed FIP (intestinal

1  
2  
3 perforation, classified as non-NEC) in addition to the primary NEC (Battersby et al).  
4  
5 definition. The statistical analyses will be repeated using propensity score matching (with  
6  
7 propensity scores based on exposure regression), as an alternative approach to logistic  
8  
9 regression.  
10

### 11 12 **Secondary analyses**

13  
14 We intend to use the same logistic regression models for secondary outcomes, as those  
15  
16 specified for the primary outcome. The most important confounders (or proxies) for the  
17  
18 secondary outcomes are included in this model. Detailed model specification for each  
19  
20 specific secondary outcome as done for the primary outcome is beyond the aim and scope of  
21  
22 this study (focusing on NEC). With propensity score matching, direct comparison between  
23  
24 antibiotic exposure versus controls can in principle be performed for any outcome, assuming  
25  
26 correct model specification for the propensity score.  
27  
28  
29

### 30 31 **Exploratory analyses**

32  
33 Additional non-defined exploratory analyses based on findings from the dataset may be  
34  
35 performed.  
36

### 37 38 **Missing data**

39  
40 We assume that missing data occur randomly between groups and will be imputed ten-fold  
41  
42 using multiple imputation by chained equations. Results will be pooled according to Rubin's  
43  
44 rule.  
45

### 46 47 **Multiple testing**

48  
49 Adjusted P values will be reported with Bonferroni correction of the two primary analyses  
50  
51 (along with corresponding 97.5% confidence intervals) and Benjamini-Hochberg adjusted P  
52  
53 values from the secondary analyses. Post hoc exploratory analyses will be reported without  
54  
55 adjustment of P values and should be interpreted with corresponding caution.  
56  
57  
58  
59  
60

## **TRIAL REGISTRATION, ETHICS AND HRA**

The study will be registered with International Standard Randomised Controlled Trials Number (ISRCTN) before opening and is sponsored by Newcastle Hospitals NHS Foundation Trust and the protocol with statistical analysis plan will be uploaded to the Open Science Framework website [osf.io](https://osf.io) prior to data analysis initiation. We will apply for HRA/REC approvals. The study is observational and uses de-identified data that is already collected.

## **PATIENT PUBLIC INVOLVEMENT AND IMPORTANCE TO THE NHS**

We have worked closely with parents on all our studies. The NEC UK parent group and other parent groups and representatives continue to assert that better understanding of NEC is a key priority. The NHS, parents and babies experience significant burden from NEC in terms of adverse outcome, prolonged hospitalisation, developmental impact and NHS costs. There is significant concern related to use of antibiotics in the neonatal population and it is important that studies help optimal use of early antibiotics.

## **DISCUSSION**

This study aims to add relevant scientific information to an important clinical decision made for every preterm infant admitted to a neonatal unit: the use and duration of antibiotics in the absence of clear signs of bacteraemia or early onset sepsis. Cases of culture-proven early onset sepsis (EOS) are relatively few, with rates being one to seven per 1000 live births in high income countries[22]. There are potentially large numbers of infants where a clinical choice is available to withhold early antibiotic treatment. Data are currently conflicting as to the overall impact on NEC of receiving (or withholding) antibiotics in the first days of life. Early bacterial nature and load in the preterm gut has been linked to NEC development[23, 24]. Use of intravenous antibiotics shortly after birth may slow colonisation, allowing the gut immune system a short period of adaption that reduces the risk of TLR4 mediated NEC[25].



1  
2  
3 The integrity of the mucosal barrier has been shown to improve significantly in the first days  
4 after preterm birth in humans[26]. Thus, potentially only short duration of very early  
5 antibiotic treatment may be relevant for such effect, in contrast to prolonged treatment which  
6  
7 have been shown to cause persistent gut dysbiosis[27] that may instead increase NEC  
8  
9 risk[7,8]. Data from a piglet model of NEC suggests that antibiotic use is mechanistically  
10  
11 linked to preterm NEC development[28] and preterm immune development[29]. However no  
12  
13 difference was seen in total bacterial load of stool in preterm infants who did and did not go  
14  
15 on to develop NEC[30]. Given the conflicting data Clinicians need better information to help  
16  
17 guide early antibiotic treatment in relation to NEC, especially important as NEC rates in  
18  
19 premature infants may actually be increasing[31]. The proposed study using NNRD benefits  
20  
21 from access to large numbers of infants with recorded relevant risk factors and outcomes.  
22  
23 Large datasets offer the advantage of including many NEC cases, and we anticipate around  
24  
25 1500 informative cases of NEC. These data are increasingly well validated by individual  
26  
27 units at the point of data entry, but are potentially less well validated than infants with trial  
28  
29 data collected within specific trials.  
30  
31  
32  
33  
34  
35  
36

37 We have in this study given careful thought to handling confounding factors. Analysis of the  
38  
39 current understanding of NEC and the use of directed acyclic graph to guide analysis have  
40  
41 been undertaken to attempt to control for what are highly complex clinical factors[17-19]. As  
42  
43 demonstrated in the DAG many factors, including those on a causal pathway to NEC, impact  
44  
45 the decision to administer early antibiotics[20-21]. The aim to analyse this data using both  
46  
47 propensity scoring and logistic regression is a major strength for this study and for future  
48  
49 analyses using large databases to address complex questions. Propensity scoring has recently  
50  
51 been used to address feeding during hypothermia[32] and the impact of early parenteral  
52  
53 nutrition on preterm outcomes[33] using the NNRD, but without alternate statistical  
54  
55 approach. Whilst both propensity scoring and regression analysis have strengths and  
56  
57  
58  
59  
60

1  
2  
3 weaknesses to the best of our knowledge direct comparison of these methodologies has not  
4  
5 been undertaken within large neonatal datasets, and is important methodologically for future  
6  
7 neonatal studies. The data generated by this study will thus inform important aspects of  
8  
9 wider neonatal care and in relation to early neonatal use of antibiotics and later occurrence of  
10  
11 NEC.  
12  
13  
14  
15  
16

### 17 **AUTHOR CONTRIBUTIONS**

18  
19 NE had the original idea for the study. RS undertook the DAG, RS,JF,JB, PTS planned  
20  
21 statistical analysis. All authors have contributed to overall study design, protocol  
22  
23 development and the writing and review of this paper.  
24  
25

### 26 **FUNDING**

27  
28 We will use institutional co-funding to cover the cost of data extraction from the NNRD.  
29  
30 Work to plan and carry out the analytical work of this study was supported by a grant from  
31  
32 the Novo Nordic Foundation (postdoctoral fellowship to René Shen, BRIDGE Translational  
33  
34 Excellence Programme, grant no. NNF18SA0034956).  
35  
36

### 37 **COMPETING INTERESTS**

38  
39 No author has relevant competing interests to declare.  
40  
41

### 42 **DATA STATEMENT**

43  
44 Data may be available on request to the corresponding author.  
45  
46  
47  
48  
49  
50  
51  
52  
53  
54  
55  
56  
57  
58  
59  
60

## REFERENCES

- 1 March of Dimes, PMNCH, Save the Children W. Born too soon. *Born Too Soon, Glob Action Rep Preterm Birth* Eds CP Howson, MV Kinney, JE Lawn *World Heal Organ Geneva* 2012;**13**:1–126.
- 2 Khan KA, Petrou S, Dritsaki M, *et al*. Economic costs associated with moderate and late preterm birth: A prospective population-based study. *BJOG An Int J Obstet Gynaecol* 2015;**122**:1495–505.
- 3 Berrington JE, Hearn RI, Bythell M, *et al*. Deaths in preterm infants: Changing pathology over 2 decades. *J Pediatr* 2011;**160**:49-53.
- 4 Battersby C, Santhalingam T, Costeloe K, *et al*. Incidence of neonatal necrotising enterocolitis in high-income countries: A systematic review. *Arch. Dis. Child. Fetal Neonatal Ed.* 2018;**103**:F182–9.
- 5 Jones IH, Hall NJ. Contemporary Outcomes for Infants with Necrotizing Enterocolitis—A Systematic Review. *J Pediatr* Published Online First: January 2020. doi:10.1016/j.jpeds.2019.11.011
- 6 Greenberg RG, Chowdhury D, Hansen NI, *et al*. Prolonged duration of early antibiotic therapy in extremely premature infants. *Pediatr Res* 2019;**85**:994–1000.
- 7 Kuppala VS, Meinzen-Derr J, Morrow AL, *et al*. Prolonged initial empirical antibiotic treatment is associated with adverse outcomes in premature infants. *J Pediatr* Published Online First: 2011. doi:10.1016/j.jpeds.2011.05.033
- 8 Michael Cotten JC. Prolonged Duration of Initial Empirical Antibiotic Treatment is associated with increased rates of necrotizing enterocolitis and death for extremely low birth weight infants. *Pediatrics* 2009;**123**:58–66.
- 9 Pammi M, Cope J, Tarr PI, *et al*. Intestinal dysbiosis in preterm infants preceding necrotizing enterocolitis: a systematic review and meta-analysis. *Microbiome* Published Online First: 2017. doi:10.1186/s40168-017-0248-8
- 10 Li Y, Shen RL, Ayede AI, *et al*. Early Use of Antibiotics Is Associated with a Lower Incidence of Necrotizing Enterocolitis in Preterm, Very Low Birth Weight Infants: The NEOMUNE-NeoNutriNet Cohort Study. *J Pediatr* 2020;**227**:128-134.e2.
- 11 Letouzey M, Lorthe E, Marchand-Martin L, *et al*. Early antibiotic exposure and adverse outcomes in very preterm infants at low risk of early-onset sepsis: the EPIPAGE-2 cohort study. *J Pediatr* Published Online First: 20 December 2021. doi:10.1016/j.jpeds.2021.11.075
- 12 Cantey J. Early antibiotic therapy and adverse outcomes in preterm infants: Time for a trial! *J Pediatr* Published Online First: 2020. doi:10.1016/j.jpeds.2020.07.046
- 13 Ruoss J, Bazacliu C, Russell J, *et al*. Routine Early Antibiotic use in Symptomatic preterm Neonates (REASON): a prospective randomized controlled trial. Published Online First MedRxiv: 2020. doi:10.1101/2020.04.17.20069617
- 14 Spencer A and Modi N. National neonatal data to support specialist care and improve infant outcomes. *Arch Dis Child Fetal Neonatal Ed* 2013;**98**.
- 15 VanderWeele TJ. Principles of confounder selection. *Eur J Epidemiol* 2019;**34**:211–9.

- 1  
2  
3 16 Vittinghoff E and McCulloch CE. Relaxing the rule of ten events per variable in  
4 logistic and cox regression. *Am J Epidemiol* 2007;**165**:710–8.  
5
- 6 17 Samuels N, van de Graaf RA, de Jonge RCJ, et al. Risk factors for necrotizing  
7 enterocolitis in neonates: a systematic review of prognostic studies. *BMC Pediatr*  
8 2017;**17**:105.  
9
- 10 18 Rose AT and Patel RM. A critical analysis of risk factors for necrotizing enterocolitis.  
11 *Semin Fetal Neonatal Med* 2018;**23**:374–9.  
12
- 13 19 Gephart SM, McGrath JM, Effken JA, et al. Necrotizing enterocolitis risk state of the  
14 science. *Adv Neonatal Care* 2012;**12**:77–87.  
15
- 16 20 Puopolo KM, Benitz WE, Zaoutis TE, et al Committee on fetus and newborn;  
17 committee on infectious diseases. Management of Neonates Born at  $\leq 34\ 6/7$  Weeks'  
18 Gestation With Suspected or Proven Early-Onset Bacterial Sepsis. *Pediatrics*. 2018  
19 Dec;**142**(6):e20182896. doi: 10.1542/peds.2018-2896.  
20
- 21 21 Martius JA, Roos T, Gora B, et al. Risk factors associated with early-onset sepsis in  
22 premature infants. *Eur J Obstet Gynecol Reprod Biol* 1999;**85**:151–8.  
23
- 24 22 Lukacs SL and Schrag SJ. Clinical sepsis in neonates and young infants, United States,  
25 1988-2006. *J Pediatr*. 2012;**160**(6):960-5.  
26
- 27 23 Choi YS and Song IG. Fetal and preterm infant microbiomes: A new perspective of 18  
28 necrotizing enterocolitis. *Korean J Pediatr* 2017;**60**:307–11.  
29
- 30 24 Brower-Sinning R, Zhong D, Good M, et al. Mucosa Associated Bacterial Diversity in  
31 Necrotizing Enterocolitis. *PLoS ONE* 2014;**9**(9): e105046  
32
- 33 25 Mihi B and Good M. Impact of Toll-Like Receptor 4 Signalling in Necrotizing  
34 Enterocolitis: The State of the Science. *Clin Perinatol* 2018;  
35 doi:10.1016/j.clp.2018.09.007  
36
- 37 26 van Elburg RM, Fetter WPF, Bunkers CM, et al. Intestinal permeability in relation  
38 to birth weight and gestational and postnatal age. *Arch Dis Child Fetal Neonatal Ed*  
39 2003;**88**:F52-5.  
40
- 41 27 Zwittink R, Renes I, van Lingen R, et al. Association between duration of  
42 intravenous antibiotic administration and early-life microbiota development in late-  
43 preterm infants. *Eur J Clin Microbiol Infect Dis* 2018; **37**:475–483.  
44
- 45 28 Jensen ML, Thymann T, Cilieborg MS, et al. Antibiotics modulate intestinal  
46 immunity and prevent necrotizing enterocolitis in preterm neonatal piglets. *Am J*  
47 *Physiol Gastrointest Liver Physiol* 2014;**306**:G59-71.  
48
- 49 29 Nguyen DN, Fuglsang E, Jiang P, et al. Oral antibiotics increase blood neutrophil  
50 maturation and reduce bacteremia and necrotizing enterocolitis in the immediate  
51 postnatal period of preterm pigs. *Innate Immun* 2016;**22**:51–62.  
52
- 53 30 Abdulkadir B, Nelson A, Skeath T, et al. Stool bacterial load in preterm infants with  
54 necrotising enterocolitis. *Earl Hum Dev* 2016;**95**:1-1.  
55  
56  
57  
58  
59  
60

- 1  
2  
3 31 Juhl SM, Gregersen R, Lange T, et al. Incidence and risk of necrotizing enterocolitis in  
4 Denmark from 1994-2014. *PLoS ONE* 2019;14(7)  
5  
6 32 Gale C, Jeyakumaran D, Longford N, et al Administration of parenteral nutrition  
7 during therapeutic hypothermia: a population level observational study using routinely  
8 collected data held in the National Neonatal Research Database *Arch Dis Child - Fetal*  
9 *Neonatal Ed on* 2021;106:608-613.  
10  
11  
12 33 Webbe JWH, Longford N, Battersby C, et al Outcomes in relation to early parenteral  
13 nutrition use in preterm neonates born between 30 and 33 weeks' gestation: a  
14 propensity score matched observational study. *Arch Dis Child - Fetal Neonatal*  
15 *Ed* 2022;107:131-136.  
16  
17  
18  
19  
20  
21  
22  
23  
24  
25  
26  
27  
28  
29  
30  
31  
32  
33  
34  
35  
36  
37  
38  
39  
40  
41  
42  
43  
44  
45  
46  
47  
48  
49  
50  
51  
52  
53  
54  
55  
56  
57  
58  
59  
60

For peer review only

## FIGURE LEGEND

Figure 1. Directed Acyclic Graph (DAG) diagram of causal assumptions related to the hypothesis based on subject-matter knowledge, used for confounder selection. Model code text for figure and interactive diagram analysis on dagitty.net is available in Appendix 2.

Node with arrowhead: exposure; Node with I: outcome; Black nodes: ancestor of outcome;

Dark grey nodes: ancestor of exposure and outcome; White nodes: adjusted variables

(primary analysis); Thick arrow: causal path; Thin arrows: non-biasing paths. AB: early

antibiotics; BW: birth weight; GA: gestational age; GDM: gestational diabetes mellitus;

IUGR: intrauterine growth restriction; NEC: necrotising enterocolitis; PDA: patent ductus

arteriosus; SES: socioeconomic status

1  
2  
3  
4  
5  
6  
7  
8  
9  
10  
11  
12  
13  
14  
15  
16  
17  
18  
19  
20  
21  
22  
23  
24  
25  
26  
27  
28  
29  
30  
31  
32  
33  
34  
35  
36  
37  
38  
39  
40  
41  
42  
43  
44  
45  
46  
47  
48  
49  
50  
51  
52  
53  
54  
55  
56  
57  
58  
59  
60

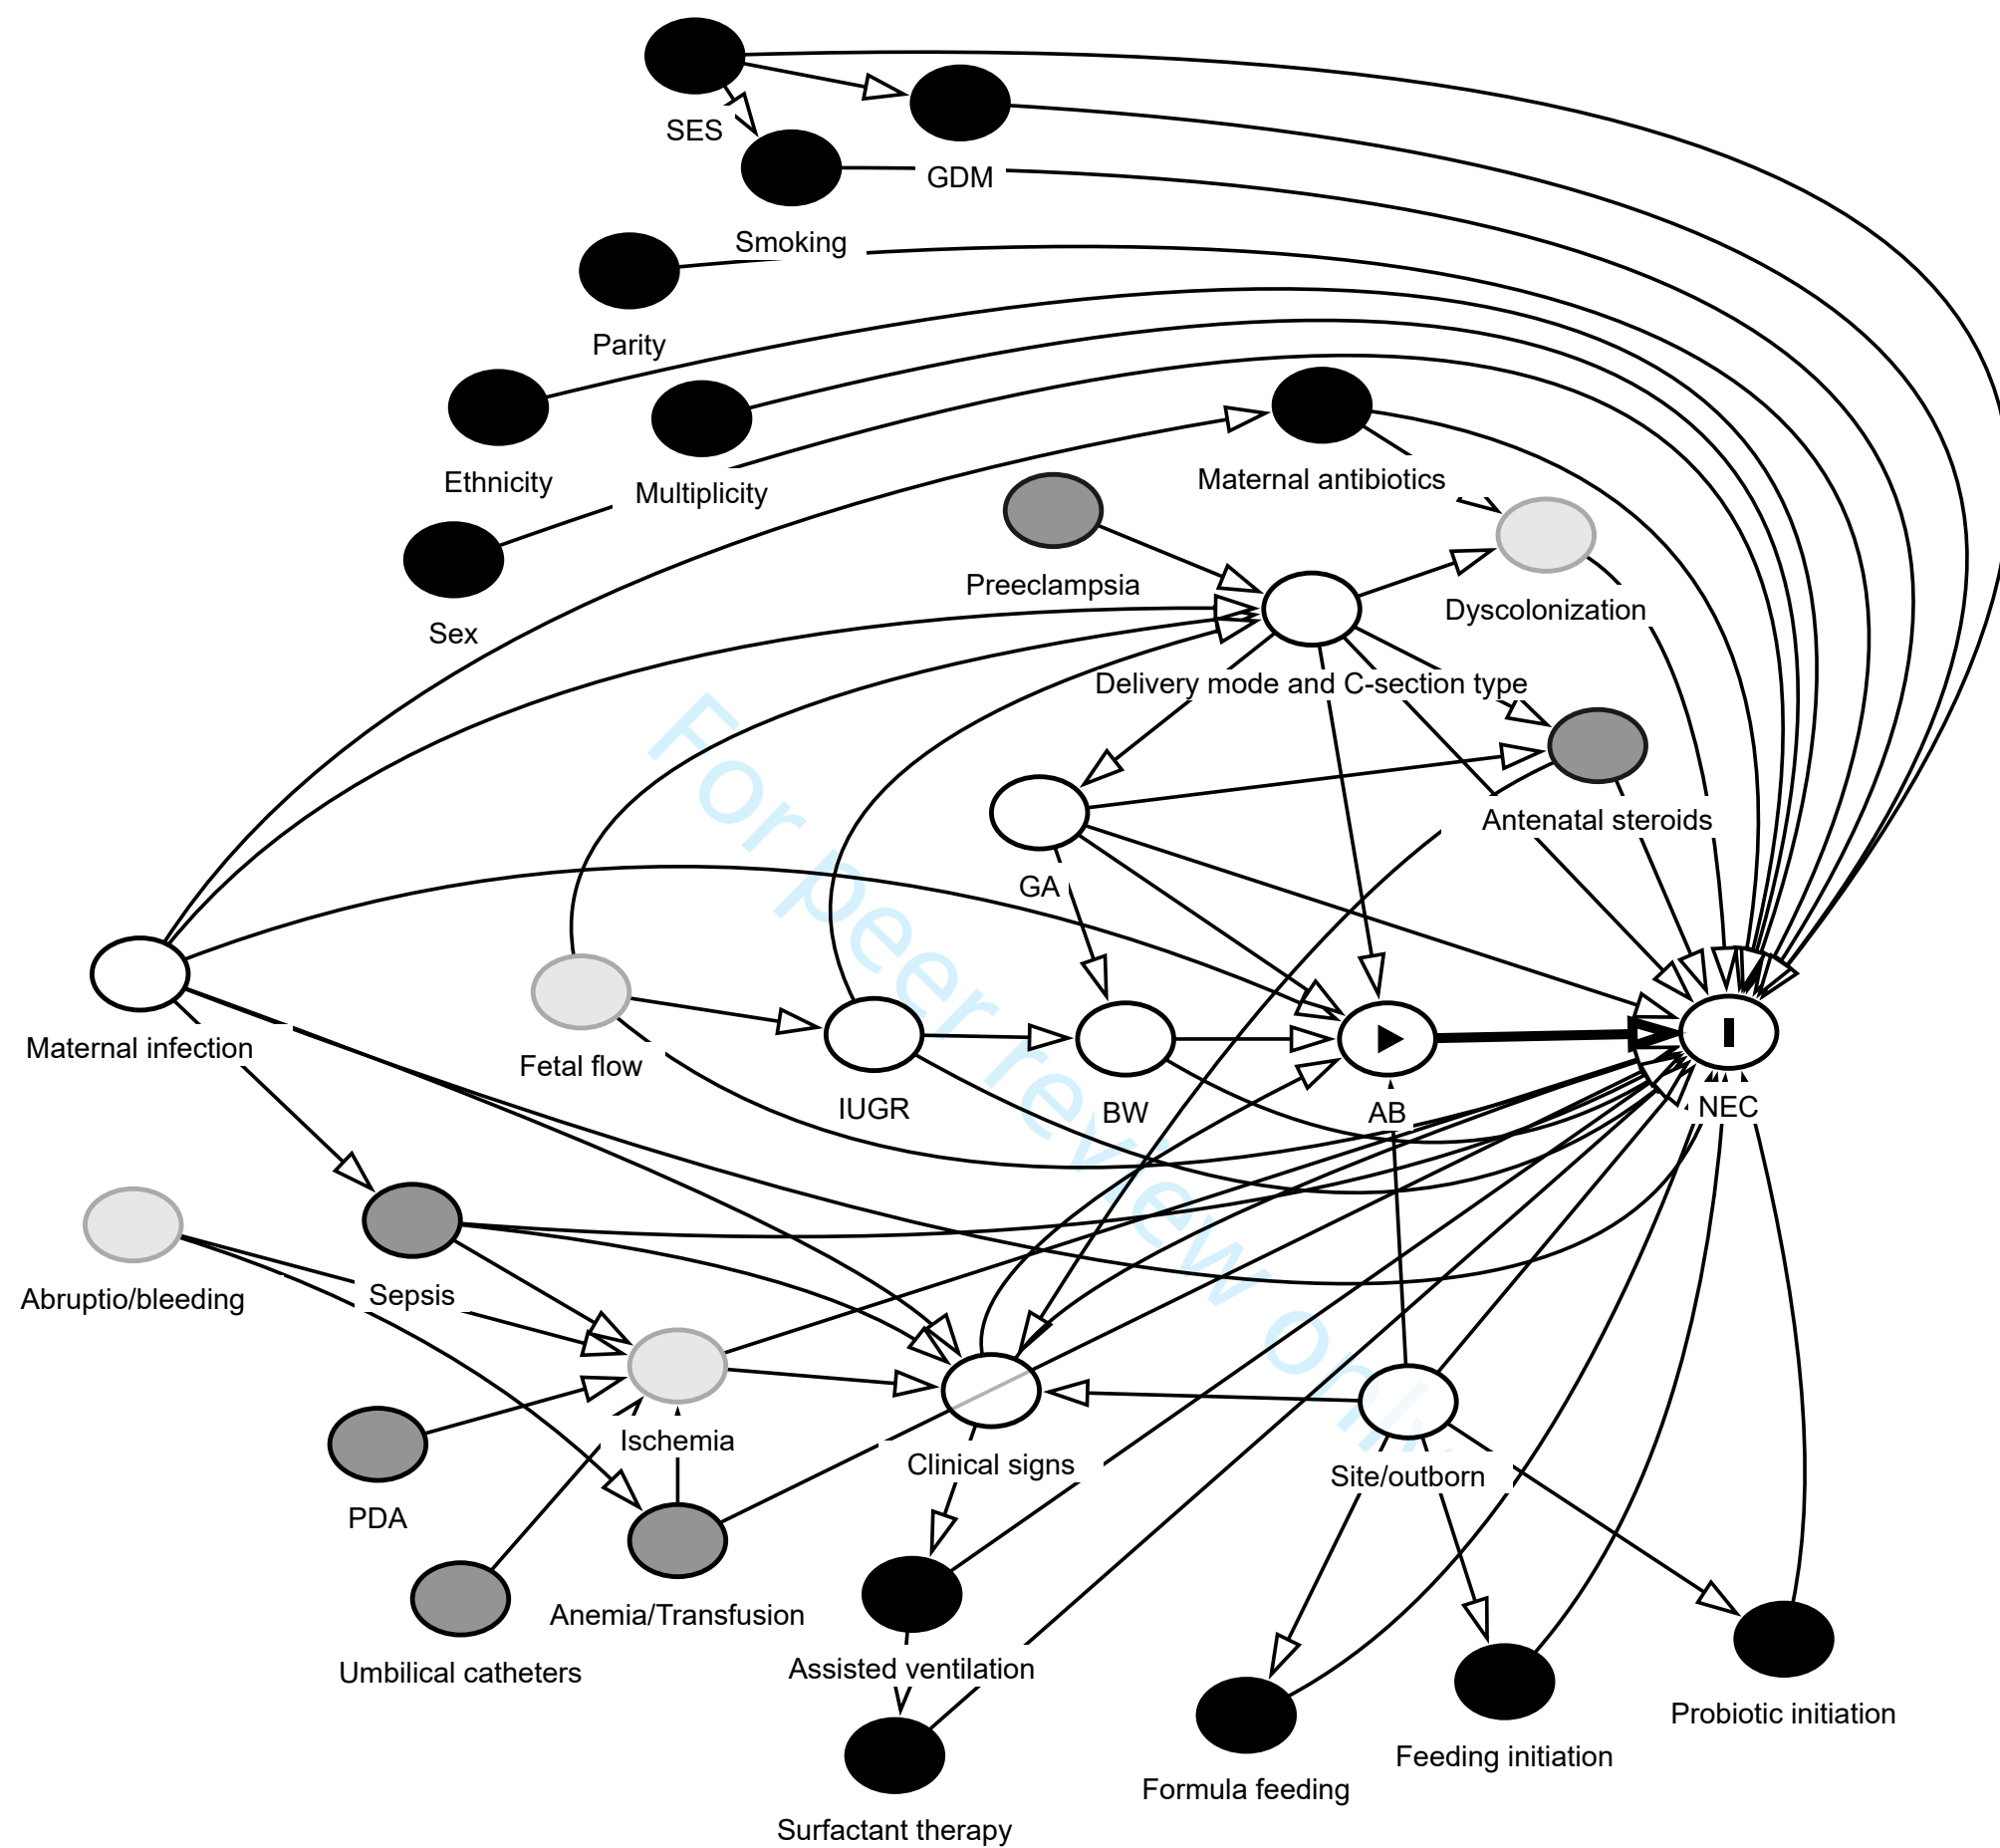

| Clevermed code | ICD-10 code | Diagnosis                                                                             |
|----------------|-------------|---------------------------------------------------------------------------------------|
| 10741          | Q39.0       | Oesophageal atresia without distal fistula                                            |
| 16195          | Q39.0       | Atresia of oesophagus without fistula                                                 |
| 10740          | Q39.1       | Oesophageal atresia with distal tracheo-oesophageal fistula                           |
| 16196          | Q39.1       | Atresia of oesophagus with tracheo-oesophageal fistula (TOF)                          |
| 16197          | Q39.2       | Congenital tracheo-oesophageal fistula without atresia (TOF)                          |
| 10273          | Q39.3       | Congenital stenosis of the oesophagus                                                 |
| 16198          | Q39.3       | Congenital stenosis and stricture of oesophagus                                       |
| 16199          | Q39.4       | Oesophageal web                                                                       |
| 10358          | Q41.0       | Duodenal atresia / stenosis / web (specify)                                           |
| 16212          | Q41.0       | Congenital absence, atresia and stenosis of duodenum                                  |
| 16213          | Q41.0       | DA Duodenal atresia / stenosis                                                        |
| 10605          | Q41.1       | Jejunal atresia / stenosis (specify)                                                  |
| 16214          | Q41.1       | JA Jejunal atresia / stenosis                                                         |
| 10541          | Q41.2       | Ileal atresia / stenosis (specify)                                                    |
| 16215          | Q41.2       | Congenital absence, atresia and stenosis of ileum                                     |
| 16216          | Q41.2       | IA Ileal atresia / stenosis                                                           |
| 16217          | Q41.X       | Congenital absence, atresia and stenosis of small intestine                           |
| 16218          | Q42.0       | Congenital absence, atresia and stenosis of rectum with fistula                       |
| 10496          | Q42.00      | High anorectal anomaly with rectourethral fistula                                     |
| 10497          | Q42.01      | High anorectal anomaly with rectovesical fistula                                      |
| 10498          | Q42.02      | High anorectal anomaly with rectovulval fistula                                       |
| 10495          | Q42.03      | High anorectal anomaly with rectocutaneous fistula                                    |
| 10494          | Q42.04      | High anorectal anomaly with rectocloacal fistula                                      |
| 10493          | Q42.08      | High anorectal anomaly with fistula (specify)                                         |
| 10499          | Q42.1       | High anorectal anomaly without fistula                                                |
| 16219          | Q42.1       | Congenital absence, atresia and stenosis of rectum without fistula                    |
| 16220          | Q42.2       | Congenital absence, atresia and stenosis of anus with fistula                         |
| 10636          | Q42.20      | Low anorectal anomaly with anocutaneous fistula                                       |
| 10637          | Q42.21      | Low anorectal anomaly with anovestibular fistula                                      |
| 10638          | Q42.28      | Low anorectal anomaly with fistula (other specify)                                    |
| 10639          | Q42.3       | Low anorectal anomaly without fistula                                                 |
| 16221          | Q42.3       | Congenital absence, atresia and stenosis of anus without fistula                      |
| 10240          | Q42.31      | Congenital anal stenosis                                                              |
| 16222          | Q42.8       | Congenital absence, atresia and stenosis of anus of other parts of large intestine    |
| 16223          | Q429        | Congenital absence, atresia and stenosis of anus of large intestine, part unspecified |
| 16224          | Q42X        | Congenital absence, atresia and stenosis of large intestine                           |
| 16235          | Q43.7       | Persistent cloaca                                                                     |

Supplementary Table 1 Gastrointestinal anomalies



| Clevermed code | ICD-10 code | Diagnosis                                                      |
|----------------|-------------|----------------------------------------------------------------|
| 15890          | Q00.0       | Anencephaly                                                    |
| 15891          | Q00.1       | Craniorachischisis                                             |
| 15892          | Q00.2       | Iniencephaly                                                   |
| 15893          | Q00.X       | Anencephaly and similar malformations                          |
| 15894          | Q01.0       | Frontal encephalocele                                          |
| 15895          | Q01.1       | Nasofrontal encephalocele                                      |
| 15896          | Q01.2       | Occipital encephalocele                                        |
| 15897          | Q01.8       | Encephalocele of other sites                                   |
| 15898          | Q01.9       | Encephalocele (unknown or unspecified cause)                   |
| 15899          | Q01.X       | Encephalocele                                                  |
| 15918          | Q04.2       | Holoprosencephaly                                              |
| 15926          | Q05.0       | Cervical spina bifida with hydrocephalus                       |
| 15927          | Q05.1       | Thoracic spina bifida with hydrocephalus                       |
| 15928          | Q05.2       | Lumbar spina bifida with hydrocephalus                         |
| 15929          | Q05.3       | Sacral spina bifida with hydrocephalus                         |
| 15930          | Q05.4       | (unknown or unspecified cause) spina bifida with hydrocephalus |
| 15931          | Q05.5       | Cervical spina bifida without hydrocephalus                    |
| 15932          | Q05.6       | Thoracic spina bifida without hydrocephalus                    |
| 15933          | Q05.7       | Lumbar spina bifida without hydrocephalus                      |
| 15934          | Q05.8       | Sacral spina bifida without hydrocephalus                      |
| 15935          | Q05.9       | Spina bifida (unknown or unspecified cause)                    |
| 10986          | Q05.9a      | Spina bifida                                                   |
| 10704          | Q05.9b      | Myelomeningocele (specify site)                                |
| 15936          | Q05.X       | Spina bifida                                                   |
| 16024          | Q20.0       | Common arterial trunk (Truncus malformation)                   |
| 10356          | Q20.1       | Double outlet right ventricle (DORV)                           |
| 16025          | Q20.1       | Double outlet right ventricle (DORV)                           |
| 16026          | Q20.2       | Double outlet left ventricle (DOLV)                            |
| 11070          | Q20.3       | Transposition of the great vessels (TGA)                       |
| 16027          | Q20.3       | Transposition great arteries (TGA)                             |
| 16028          | Q20.4       | Double inlet ventricle (DILV)                                  |
| 16029          | Q20.5       | Discordant atrioventricular connection                         |
| 16030          | Q20.6       | Isomerism of atrial appendages                                 |
| 16031          | Q20.8       | Other cong malforms of cardiac chambers and connections        |
| 16032          | Q20.9       | Cong malforms of cardiac chambers and connections unspec       |
| 16033          | Q20.X       | Congenital malformations of cardiac chambers and connections   |
| 16035          | Q20.91      | Atrium single                                                  |
| 16036          | Q20.92      | Ventricle single                                               |
| 10097          | Q21.2       | Atrio-ventricular septal defect (AVSD)                         |
| 16039          | Q21.2       | Atrioventricular septal defect (AVSD)                          |
| 11043          | Q21.3       | Tetralogy of Fallot                                            |
| 16040          | Q21.3       | Tetralogy of Fallot                                            |

|    |       |        |                                                                           |
|----|-------|--------|---------------------------------------------------------------------------|
| 1  |       |        |                                                                           |
| 2  |       |        |                                                                           |
| 3  |       |        |                                                                           |
| 4  | 16045 | Q22.0  | Pulmonary valve atresia                                                   |
| 5  | 16046 | Q22.1  | Congenital pulmonary valve stenosis                                       |
| 6  | 16047 | Q22.2  | Congenital pulmonary valve insufficiency                                  |
| 7  | 16048 | Q22.3  | Other congenital malformations of pulmonary valve                         |
| 8  | 16049 | Q22.4  | Congenital tricuspid atresia / stenosis                                   |
| 9  | 16050 | Q22.5  | Ebstein's anomaly                                                         |
| 10 | 16051 | Q22.6  | Hypoplastic right heart syndrome                                          |
| 11 | 16052 | Q22.8  | Other congenital malformations of tricuspid valve                         |
| 12 | 16053 | Q22.9  | Congenital malformation of tricuspid valve (unknown or unspecified cause) |
| 13 | 16054 | Q22.X  | Congenital malformations of pulmonary and tricuspid valves                |
| 14 | 16055 | Q23.0  | Congenital stenosis of aortic valve (AS)                                  |
| 15 | 16056 | Q23.1  | Congenital insufficiency of aortic valve                                  |
| 16 | 16057 | Q23.2  | Congenital mitral stenosis (MS)                                           |
| 17 | 16058 | Q23.3  | Mitral atresia                                                            |
| 18 | 16059 | Q23.4  | Hypoplastic left heart syndrome (HLH)                                     |
| 19 | 16060 | Q23.8  | Other congenital malformations of aortic and mitral valves                |
| 20 | 16061 | Q23.9  | Congenital malformation of aortic and mitral valves unspec                |
| 21 | 16062 | Q23.X  | Congenital malformations of aortic and mitral valves                      |
| 22 | 16079 | Q25.1  | Coarctation of aorta                                                      |
| 23 | 10227 | Q25.19 | Coarctation of the aorta                                                  |
| 24 | 16080 | Q25.2  | Hypoplasia of aortic arch                                                 |
| 25 | 16081 | Q25.3  | Stenosis of aorta (AS)                                                    |
| 26 | 16082 | Q25.4  | Malformation of aorta                                                     |
| 27 | 16083 | Q25.5  | Atresia of pulmonary artery                                               |
| 28 | 16084 | Q25.6  | Stenosis of pulmonary artery (PS)                                         |
| 29 | 16086 | Q25.8  | Other congenital malformations of great arteries                          |
| 30 | 16087 | Q25.8  | Transposition of the great vessels (TGA)                                  |
| 31 | 11057 | Q26.2  | Total anomalous pulmonary venous drainage (TAPVD)                         |
| 32 | 16092 | Q26.2  | Total anomalous pulmonary venous connection (TAPVD)                       |
| 33 | 16154 | Q33.6  | Hypoplasia and dysplasia of lung                                          |
| 34 | 16241 | Q44.2  | Atresia of bile ducts                                                     |
| 35 | 10123 | Q60.1  | Bilateral renal agenesis                                                  |
| 36 | 16318 | Q60.1B | Renal agenesis, bilateral                                                 |
| 37 | 16324 | Q60.6  | Potter's syndrome                                                         |
| 38 | 16327 | Q61.1  | Polycystic kidney, infantile type                                         |
| 39 | 10100 | Q61.1a | Autosomal recessive polycystic kidney - infantile                         |
| 40 | 10367 | Q64.1  | Ectopia vesicae                                                           |
| 41 | 16356 | Q64.1  | Exstrophy of urinary bladder                                              |
| 42 | 10854 | Q64.2  | Posterior urethral valves (PUV)                                           |
| 43 | 16357 | Q64.2  | Congenital posterior urethral valves (PUV)                                |
| 44 | 16360 | Q64.5  | Congenital absence of bladder and urethra                                 |
| 45 | 10008 | Q64.5a | Absence of bladder                                                        |
| 46 | 10236 | Q64.5b | Congenital absence of urethra                                             |
| 47 | 16475 | Q77.1  | Thanatophoric short stature                                               |
| 48 |       |        |                                                                           |
| 49 |       |        |                                                                           |
| 50 |       |        |                                                                           |
| 51 |       |        |                                                                           |
| 52 |       |        |                                                                           |
| 53 |       |        |                                                                           |
| 54 |       |        |                                                                           |
| 55 |       |        |                                                                           |
| 56 |       |        |                                                                           |
| 57 |       |        |                                                                           |
| 58 |       |        |                                                                           |
| 59 |       |        |                                                                           |
| 60 |       |        |                                                                           |

|       |        |                                                  |
|-------|--------|--------------------------------------------------|
| 10246 | Q79.0  | Congenital diaphragmatic hernia                  |
| 10490 | Q79.0  | Hernia into the cord                             |
| 16495 | Q79.0  | Congenital diaphragmatic hernia                  |
| 16496 | Q79.1A | Aplasia of diaphragm                             |
| 16497 | Q79.1E | Eventration of diaphragm                         |
| 16498 | Q79.2  | Exomphalos                                       |
| 10395 | Q79.2  | Exomphalos                                       |
| 16499 | Q79.3  | Gastroschisis                                    |
| 16589 | Q90.0  | Trisomy 21, meiotic nondisjunction               |
| 16590 | Q90.1  | Trisomy 21, mosaicism (mitotic nondisjunction)   |
| 16591 | Q90.2  | Trisomy 21, translocation                        |
| 16592 | Q90.9  | Down's syndrome (unknown or unspecified cause)   |
| 16593 | Q90.X  | Down's syndrome                                  |
| 16594 | Q91.0  | Trisomy 18, meiotic nondisjunction               |
| 16595 | Q91.1  | Trisomy 18, mosaicism (mitotic nondisjunction)   |
| 16596 | Q91.2  | Trisomy 18, translocation                        |
| 16597 | Q91.3  | Edwards' syndrome (unknown or unspecified cause) |
| 16598 | Q91.4  | Trisomy 13, meiotic nondisjunction               |
| 16599 | Q91.5  | Trisomy 13, mosaicism (mitotic nondisjunction)   |
| 16600 | Q91.6  | Trisomy 13, translocation                        |
| 16601 | Q91.7  | Patau's syndrome (unknown or unspecified cause)  |
| 16602 | Q91.X  | Edwards' syndrome and Patau's syndrome           |

Supplementary Table 2 Congenital anomalies

**Early antibiotic use and incidence of necrotising enterocolitis in very preterm infants: a UK based observational study using routinely recorded data****Inclusion criteria: Birth weight < 1500g or GA < 32 wk****Born between: 1/1/2012 and 31/12/2020**

Request data as one table with individual-level data with each row representing a unique baby. Each item/variable as separate column.

**Exposure parameters:**

| Requested item  | Item name in extract | How is it derived                                                                                                                                                                                                                                                                                                                                                                                                                                                                                                                                                                                                                                                                  | Coding in extract                | Notes                                                    |
|-----------------|----------------------|------------------------------------------------------------------------------------------------------------------------------------------------------------------------------------------------------------------------------------------------------------------------------------------------------------------------------------------------------------------------------------------------------------------------------------------------------------------------------------------------------------------------------------------------------------------------------------------------------------------------------------------------------------------------------------|----------------------------------|----------------------------------------------------------|
| Antibiotics any | Antibiotics_Day1     | Postnatal Day 1 with any DailyDrugs in<br>1010155 Benzyl Penicillin<br>1010158 Augmentin<br>1010179 Flucloxacillin<br>500012 Flucloxacillin<br>500016 Gentamicin<br>500072 Co-amoxiclav<br>500086 Co-amoxiclav<br>500084 Ciprofloxacin<br>500029 Netilmicin<br>500002 Amikacin<br>500211 Tazocin<br>500023 Metronidazole<br>500040 Vancomycin<br>500007 Cefotaxime<br>500004 Ampicillin<br>500009 Cefuroxime<br>500008 Ceftazidime<br>500175 Ceftriaxone<br>500032 Piperacillin<br>500206 Ofloxacin<br>500005 Azlocillin<br>1010171 Linezolid<br>1010271 Cefalexin<br>1010139 Amoxicillin<br>500070 Amoxicillin<br>500128 Meropenem<br>500118 Imipenem<br>500145 Imipenem THEN (1) | 0 = No<br>1 = Yes<br>9 = Unknown | Indicates whether baby has received antibiotics on day 1 |
|                 | Antibiotics_Day6     | As above for each postnatal day between Day2-Day6                                                                                                                                                                                                                                                                                                                                                                                                                                                                                                                                                                                                                                  | 0 = No<br>1 = Yes                |                                                          |

|                              |                          |                                                                |                                                                                                                 |  |
|------------------------------|--------------------------|----------------------------------------------------------------|-----------------------------------------------------------------------------------------------------------------|--|
|                              |                          |                                                                | 9 = Unknown                                                                                                     |  |
| Antibiotics standard empiric |                          | As above, but only ampicillin or penicillin + gentamicin       |                                                                                                                 |  |
|                              | Day of first antibiotics | Postnatal day of first (of any) antibiotic treatment           | Numeric (age in days since birth if received antibiotics)<br>999 = No antibiotics received throughout admission |  |
|                              | Total antibiotics        | Total number of days on (any) antibiotics throughout admission | Numeric<br>999 = No antibiotics received throughout admission                                                   |  |

**Outcome parameters**

| Requested item                                             | Item name in extract         | How is it derived                                                                                                                                                    | Coding in extract                                                | Notes                                                          |
|------------------------------------------------------------|------------------------------|----------------------------------------------------------------------------------------------------------------------------------------------------------------------|------------------------------------------------------------------|----------------------------------------------------------------|
| Length of stay                                             |                              | Defined as the total number of days a baby received neonatal care (any level of care) from Daily Care General Information - LOCATIONS OF HIGHEST LEVEL OF CARE       | Numeric (age in days at discharge)                               |                                                                |
| Survival                                                   | PostnatalDayofDeath          | Where the following is true:<br>DayDateAnon where<br>DischargeDestination = 3                                                                                        | Numeric (age in days since birth if baby died)<br>999 = Survived |                                                                |
|                                                            | Death before day of interest | According to above<br>- Before day 3 (exclusion)<br>- Before day 7 (for competing risk analysis)<br>- Before day 14 (for competing risk analysis)<br>- Before day 28 | 0 = Yes<br>1 = No<br>9 = Unknown                                 |                                                                |
|                                                            | SurvivaltoDischarge          | Where the following is true:<br>DischargeDestination = 3 THEN (0)                                                                                                    | 0 = Died<br>1 = Survived to discharge<br>9 = Unknown             | Survival to discharge from neonatal care for the final episode |
|                                                            | FinalDischDestination        | N/A                                                                                                                                                                  | Text                                                             | Discharge destination for the final episode                    |
| Cause of death                                             | Causeofdeath                 | ICD-10                                                                                                                                                               |                                                                  |                                                                |
| Necrotising enterocolitis (possible more than one episode) | NEC_NNAP                     | Where the following is true:<br>NECTreatment > 0 AND<br>XRayAppearances in                                                                                           | 0 = No NEC<br>1 = NEC present<br>9 = Unknown                     | NNAP definition                                                |

|                             |  |                                                                                                                                                                                                                                                                                                                                                                                                                                                                                                                                                                                                                                                                                                                                                                                                                                                                                                                                                                                                                                                                                                                                                                                                                                                                  |                                                                     |                                            |
|-----------------------------|--|------------------------------------------------------------------------------------------------------------------------------------------------------------------------------------------------------------------------------------------------------------------------------------------------------------------------------------------------------------------------------------------------------------------------------------------------------------------------------------------------------------------------------------------------------------------------------------------------------------------------------------------------------------------------------------------------------------------------------------------------------------------------------------------------------------------------------------------------------------------------------------------------------------------------------------------------------------------------------------------------------------------------------------------------------------------------------------------------------------------------------------------------------------------------------------------------------------------------------------------------------------------|---------------------------------------------------------------------|--------------------------------------------|
|                             |  | <p>Pneumatosis<br/>Pneumoperitoneum AND</p> <p>ClinicalFindings in<br/>Increased/bilious aspirate<br/>Abdominal distension<br/>Bloody stools THEN (1)</p>                                                                                                                                                                                                                                                                                                                                                                                                                                                                                                                                                                                                                                                                                                                                                                                                                                                                                                                                                                                                                                                                                                        |                                                                     |                                            |
| <p>Severe_NEC_Battersby</p> |  | <p>Where the following is true:<br/>CauseOfDeath = 17<br/>OR<br/>PortMortemConfirmation = 1<br/>OR<br/>GastrointestinalDiagnoses OR PrincipleProceduresDuringStay<br/>OR PrincipalDiagnosisAtDischarge in<br/>Laparotomy<br/>Laparotomy approach NEC<br/>Colectomy and ileostomy NEC<br/>AND<br/>GastrointestinalDiagnosis or PrincipalDiagnosisAtDischarge in<br/>Necrotising enterocolitis<br/>Necrotising enterocolitis – confirmed<br/>Necrotising enterocolitis – perforated<br/>Necrotising enterocolitis – proven (on xray or surgery)<br/><br/>OR<br/>GastrointestinalDiagnoses OR PrincipalDiagnosisAtDischarge in<br/>Necrotising enterocolitis<br/>Necrotising enterocolitis – confirmed<br/>Necrotising enterocolitis – perforated<br/>Necrotising enterocolitis – proven (on xray or surgery)<br/><br/>AND<br/>DischargeDestination = 3<br/>OR<br/>GastrointestinalDiagnoses or PrincipalDiagnosisAtDischarge =<br/>Necrotising enterocolitis – perforated<br/>OR<br/>NECTreatment &gt;= 1 AND<br/>GastrointestinalDiagnoses OR PrincipalDiagnosisAtDischarge in<br/>Necrotising enterocolitis<br/>Necrotising enterocolitis – confirmed<br/>Necrotising enterocolitis – perforated<br/>Necrotising enterocolitis – proven (on xray or surgery)</p> | <p>0 = No severe NEC<br/>1 = Severe NEC present<br/>9 = Unknown</p> | <p>Battersby Severe<br/>NEC definition</p> |

|  |                            |                                                                                                                                                                                                                                                                                                                                                                                                                                                                                                                                                                                                                                                                                                                                                                                                                                                                                                                                                                                                        |                                                               |                                                   |
|--|----------------------------|--------------------------------------------------------------------------------------------------------------------------------------------------------------------------------------------------------------------------------------------------------------------------------------------------------------------------------------------------------------------------------------------------------------------------------------------------------------------------------------------------------------------------------------------------------------------------------------------------------------------------------------------------------------------------------------------------------------------------------------------------------------------------------------------------------------------------------------------------------------------------------------------------------------------------------------------------------------------------------------------------------|---------------------------------------------------------------|---------------------------------------------------|
|  |                            | <p>OR<br/>LaparotomyPerformed = Yes AND HistologyConfirmationNEC = Yes<br/>OR<br/>VisualInspectionConfirmationNEC = Yes<br/>THEN (1)</p>                                                                                                                                                                                                                                                                                                                                                                                                                                                                                                                                                                                                                                                                                                                                                                                                                                                               |                                                               |                                                   |
|  | <p>NEC_Any (pragmatic)</p> | <p>Where the following is true:<br/>(TreatmentNEC &gt;= 1<br/>OR<br/>Code in<br/>1010683 Necrotising enterocolitis – suspected<br/>10708 Necrotising enterocolitis – Perforated<br/>15809 Necrotizing enterocolitis<br/>15809 Necrotising enterocolitis - Confirmed)<br/>AND<br/>(5 or more days of nil by mouth where<br/>DayEnteralFeeds = 0 OR<br/>DayFormulaType = No entry OR<br/>VolumeMilk = 0/No entry<br/>AND<br/>5 consecutive days of antibiotics over the same five days of receiving nil by mouth where<br/>DailyDrugs in<br/>1010155 Benzyl Penicillin<br/>1010158 Augmentin<br/>1010179 Flucloxacillin<br/>500012 Flucloxacillin<br/>500016 Gentamicin<br/>500072 Co-amoxiclav<br/>500086 Co-amoxiclav<br/>500084 Ciprofloxacin<br/>500029 Netilmicin<br/>500002 Amikacin<br/>500211 Tazocin<br/>500023 Metronidazole<br/>500040 Vancomycin<br/>500007 Cefotaxime<br/>500004 Ampicillin<br/>500009 Cefuroxime<br/>500008 Ceftazidime<br/>500175 Ceftriaxone<br/>500032 Piperacillin</p> | <p>0 = No NEC present<br/>1 = NEC present<br/>9 = Unknown</p> | <p>Webbe NEC definition for any NEC treatment</p> |

|                                  |                        |                                                                                                                                                                                                                                                                                 |                            |  |
|----------------------------------|------------------------|---------------------------------------------------------------------------------------------------------------------------------------------------------------------------------------------------------------------------------------------------------------------------------|----------------------------|--|
|                                  |                        | 500206 Ofloxacillin<br>500005 Azlocillin<br>1010171 Linezolid<br>1010271 Cefalexin<br>1010139 Amoxicillin<br>500070 Amoxicillin<br>500128 Meropenem<br>500118 Imepemem<br>500145 Imipenem<br>OR<br>Died within 5 days of ' TreatmentNEC >= 1')                                  |                            |  |
|                                  | NEC onset day          | Postnatal age for NEC onset<br>TreatmentNEC >= 1<br>OR<br>First day where diagnosis 1010683 Necrotising enterocolitis – suspected<br>10708 Necrotising enterocolitis – Perforated<br>15809 Necrotizing enterocolitis<br>15809 Necrotising enterocolitis – Confirmed is recorded |                            |  |
|                                  | NEC onset PMA          | Postmenstrual age for NEC onset                                                                                                                                                                                                                                                 |                            |  |
| NEC related variables (raw data) | PostmortemConfirmation | If a necrotising enterocolitis diagnosis was made at any point at admission, specify if the post mortem confirmed it.                                                                                                                                                           | N No<br>Y Yes<br>9 Unknown |  |
|                                  | SurgicalProcedure      | Surgical procedure on the date and time specified<br>OPCS coded and/or SNOMED CT                                                                                                                                                                                                |                            |  |
|                                  | StomaInSitu            | N No<br>Y Yes                                                                                                                                                                                                                                                                   |                            |  |
|                                  | InvestigateAbdsigns    | N No<br>Y Yes                                                                                                                                                                                                                                                                   |                            |  |
|                                  | XrayAppearance         | ??<br>1 Pneumatosis<br>2 Air in the liver<br>3 Pneumoperitoneum<br>4 Fixed loop<br>5 Gasless<br>9 None of the above                                                                                                                                                             |                            |  |
|                                  | abdominalxrayfindings  | 01 Abdominal distension<br>02 Abdominal tenderness<br>03 Increased/ bilious aspirates<br>04 Abdominal discolouration<br>05 Abdominal mass<br>06 Bloody stools                                                                                                                   |                            |  |



1  
2  
3  
4  
5  
6  
7  
8  
9  
10  
11  
12  
13  
14  
15  
16  
17  
18  
19  
20  
21  
22  
23  
24  
25  
26  
27  
28  
29  
30  
31  
32  
33  
34  
35  
36  
37  
38  
39  
40  
41  
42  
43  
44  
45  
46

|                                                   |                             |                                                                                                                                                                                                                                                                                                                                                                                                      |                                                                             |  |
|---------------------------------------------------|-----------------------------|------------------------------------------------------------------------------------------------------------------------------------------------------------------------------------------------------------------------------------------------------------------------------------------------------------------------------------------------------------------------------------------------------|-----------------------------------------------------------------------------|--|
|                                                   |                             | 07 Mucousy stools<br>09 None of the above                                                                                                                                                                                                                                                                                                                                                            |                                                                             |  |
|                                                   | TransferredOutManagementNEC | N No<br>Y Yes                                                                                                                                                                                                                                                                                                                                                                                        |                                                                             |  |
|                                                   | necLaparotomy               | 0 Laparotomy not required<br>1 Laparotomy required but PATIENT too ill to carry it out<br>2 Laparotomy required and carried out                                                                                                                                                                                                                                                                      |                                                                             |  |
|                                                   | laparotomyConfirm           | N No<br>Y Yes                                                                                                                                                                                                                                                                                                                                                                                        |                                                                             |  |
|                                                   | necHistologyConfirmed       | 0 Not confirmed<br>1 Yes confirmed<br>9 No histological inspection/Not applicable                                                                                                                                                                                                                                                                                                                    |                                                                             |  |
| Infant: Sepsis suspected on first day             | SuspectedSepsisFirstDays    | Where the following is true:<br>DayDateAnon in first day of life AND first full day in unit<br>AND<br>SuspectedSepsis >= 1 (Y)                                                                                                                                                                                                                                                                       | 0 = No<br>1 = Yes<br>9 = Unknown                                            |  |
| Early onset blood stream infection                |                             | Defined from Infection Cultures (Episodic) recorded in the first 3 days/before day 3<br>• Pure growth of pathogen from blood<br>OR<br>• Pure growth of pathogen from CSF<br>OR<br>• Either a pure growth of a skin commensal or a mixed growth with ≥3 clinical signs at the time of blood sampling                                                                                                  |                                                                             |  |
| Late onset blood stream infection NNAP definition |                             | Defined from Infection Cultures (Episodic) recorded after day 3<br>• Pure growth of pathogen from blood<br>OR<br>• Pure growth of pathogen from CSF<br>OR<br>• Either a pure growth of a skin commensal or a mixed growth with ≥3 clinical signs at the time of blood sampling                                                                                                                       | Dichotomous (No infection=0, Infection=1)<br>Dichotomous<br><br>Unknown = 9 |  |
| Late onset infection, non-NNAP                    |                             | 5 consecutive days of antibiotic treatment defined as 5 consecutive days of any of the following (including in combination and changing during the 5 days) after day 3 Daily care medication<br>•1010155 Benzyl Penicillin<br>•1010158 Augmentin<br>•1010179 Flucloxacillin<br>•500012 Flucloxacillin<br>•500016 Gentamicin<br>•500072 Co-amoxiclav<br>•500086 Co-amoxiclav<br>•500084 Ciprofloxacin | Dichotomous (No infection=0, Infection=1)<br>Dichotomous                    |  |

|                                   |  |                                                                                                                                                                                                                                                                                                                                                                                                                                                                                                                                                                                                                                                                                                                                                     |  |  |
|-----------------------------------|--|-----------------------------------------------------------------------------------------------------------------------------------------------------------------------------------------------------------------------------------------------------------------------------------------------------------------------------------------------------------------------------------------------------------------------------------------------------------------------------------------------------------------------------------------------------------------------------------------------------------------------------------------------------------------------------------------------------------------------------------------------------|--|--|
|                                   |  | <ul style="list-style-type: none"> <li>•500029 Netilmicin</li> <li>•500002 Amikacin</li> <li>•500211 Tazocin</li> <li>•500023 Metronidazole</li> <li>•500040 Vancomycin</li> <li>•500007 Cefotaxime</li> <li>•500004 Ampicillin</li> <li>•500009 Cefuroxime</li> <li>•500008 Ceftazidime</li> <li>•500175 Ceftriaxone</li> <li>•500032 Piperacillin</li> <li>•500206 Ofloxacillin</li> <li>•500005 Azlocillin</li> <li>•1010171 Linezolid</li> <li>•1010271 Cefalexin</li> <li>•1010139 Amoxicillin</li> <li>•500070 Amoxicillin</li> <li>•500128 Meropenem</li> <li>•500118 Imepenem</li> <li>•500145 Imipenem</li> <li>•500069 Ambisome (Liposomal Amphotericin)</li> <li>•500003 Amphotericin</li> <li>•1010195 Amphotericin Liposoma</li> </ul> |  |  |
| Early onset infection (pragmatic) |  | >5 consecutive days of antibiotic treatment defined as 6 consecutive days of any of the following (including in combination and changing during the 6 days) before day 3 Daily care medication                                                                                                                                                                                                                                                                                                                                                                                                                                                                                                                                                      |  |  |
| Time to reach full feeding        |  | First day of 3 consecutive days where parenteral nutrition or intravenous fluid are not recorded                                                                                                                                                                                                                                                                                                                                                                                                                                                                                                                                                                                                                                                    |  |  |

**Covariates/confounders**

|                          |                |                  |                              |                                           |
|--------------------------|----------------|------------------|------------------------------|-------------------------------------------|
| BadgerID                 | AnonPatientID  |                  | N/A                          | Episode-specific identifier for each baby |
| Gestational age at birth | GestationWeeks |                  | Numeric (10 - 49)            |                                           |
|                          | GestationDays  |                  | Numeric (0-6)<br>9 = Unknown |                                           |
|                          | GA total days  | Weeks x 7 + days |                              |                                           |

|    |                            |                        |                                                                                                                                                                                                                                                                                                                                                                                                                                                                                                                                                                                                                                                                                                            |                                                                                                          |                                |
|----|----------------------------|------------------------|------------------------------------------------------------------------------------------------------------------------------------------------------------------------------------------------------------------------------------------------------------------------------------------------------------------------------------------------------------------------------------------------------------------------------------------------------------------------------------------------------------------------------------------------------------------------------------------------------------------------------------------------------------------------------------------------------------|----------------------------------------------------------------------------------------------------------|--------------------------------|
| 1  | Birth weight               | Birthweight            |                                                                                                                                                                                                                                                                                                                                                                                                                                                                                                                                                                                                                                                                                                            | Numeric (g)<br>99999 = Unknown                                                                           | Accepted range:<br>001 – 9998g |
| 2  | Birth head circumference   | BirthHeadCircumference | Can perhaps be useful to differentiate between symmetrical and asymmetrical IUGR                                                                                                                                                                                                                                                                                                                                                                                                                                                                                                                                                                                                                           |                                                                                                          |                                |
| 3  | Sex                        | Gender                 |                                                                                                                                                                                                                                                                                                                                                                                                                                                                                                                                                                                                                                                                                                            | 0 = Unknown<br>1 = Male<br>2 = Female<br>9 = Not specified                                               |                                |
| 4  | Birth weight z-score       |                        | Specify Marsal or Fenton or WHO                                                                                                                                                                                                                                                                                                                                                                                                                                                                                                                                                                                                                                                                            | Numeric<br>99999 = Unknown                                                                               |                                |
| 5  | Ethnicity                  | Race                   | Combine parental ethnicities (see row 36,39)<br>Parents Demographics ETHNIC CATEGORY (MOTHER) (categorical) Coded as: WHITE (A - British, B - Irish, C - Any other white background); MIXED (D - White and Black Caribbean, E - White and Black African, F - White and Asian, G - Any other mixed background); ASIAN OR ASIAN BRITISH (H - Indian, J - Pakistani, K - Bangladeshi, L - Any other Asian Background); BLACK OR BLACK BRITISH (M - Caribbean, N - African, P - Any other Black background); OTHER ETHNIC GROUPS (R - Chinese, S - Any other ethnic group); UNKNOWN (Z, DTA - Not stated, 99 - Not known)<br>This data item is based on self-reported ethnicity as recorded in maternity notes | ?e.g.<br>Categorised into four groups (White=1; Asian & Mixed=2; Black & Mixed=3; Other and not given=4) |                                |
| 6  | Smoking during pregnancy   | Smoking                | Pregnancy Details MOTHER CURRENT SMOKER AT BOOKING INDICATOR (categorical, codes 1-6)                                                                                                                                                                                                                                                                                                                                                                                                                                                                                                                                                                                                                      | 0 = No<br>1 = Yes<br>9 = Unknown                                                                         |                                |
| 7  | Multiplicity               | FetusNumber            | N/A                                                                                                                                                                                                                                                                                                                                                                                                                                                                                                                                                                                                                                                                                                        | Numeric<br>99 = Unknown                                                                                  |                                |
| 8  | Birth year                 | BirthYear              | N/A                                                                                                                                                                                                                                                                                                                                                                                                                                                                                                                                                                                                                                                                                                        | Numeric<br>9999 = Unknown                                                                                |                                |
| 9  | Birth year (mother)        | BirthYearMother        | N/A                                                                                                                                                                                                                                                                                                                                                                                                                                                                                                                                                                                                                                                                                                        | Numeric<br>9999 = Unknown                                                                                |                                |
| 10 | Parity of mother           | Primiparity            | Pregnancy Details PREGNANCY TOTAL PREVIOUS PREGNANCIES Dichotomous: code 00=Y; code 01- 29=N                                                                                                                                                                                                                                                                                                                                                                                                                                                                                                                                                                                                               | Primiparous: Dichotomous (Not first pregnancy=0; First pregnancy=1)                                      |                                |
| 11 | Maternal deprivation score | PostCodeMother         | LSOA centiles                                                                                                                                                                                                                                                                                                                                                                                                                                                                                                                                                                                                                                                                                              |                                                                                                          |                                |
| 12 |                            | MumEducation           |                                                                                                                                                                                                                                                                                                                                                                                                                                                                                                                                                                                                                                                                                                            |                                                                                                          |                                |
| 13 |                            | MumOccupation          |                                                                                                                                                                                                                                                                                                                                                                                                                                                                                                                                                                                                                                                                                                            |                                                                                                          |                                |
| 14 | Maternal Diabetes (Y/N)    | MaternalDiabetes       | Where the following is true:<br>ProblemsMedicalMother = 15 THEN (1)<br>ProblemsMedicalMother = 00 THEN (0)                                                                                                                                                                                                                                                                                                                                                                                                                                                                                                                                                                                                 | 0 = No maternal diabetes<br>1 = Maternal Diabetes Present<br>99 = Unknown                                | Blank entries coded in as 99   |

|                                                                                 |                             |                                                                                                                                                                                                                                                      |                                                                                         |                                       |
|---------------------------------------------------------------------------------|-----------------------------|------------------------------------------------------------------------------------------------------------------------------------------------------------------------------------------------------------------------------------------------------|-----------------------------------------------------------------------------------------|---------------------------------------|
| Maternal gestational diabetes (Y/N)                                             | MaternalGestDiabetes        | Where the following is true:<br>ProblemsDuringPregnancy = 33 THEN (1)<br>ProblemsDuringPregnancy = 00 THEN (0)                                                                                                                                       | 0 = No gestational diabetes<br>1 = Gestational diabetes present<br>99 = Unknown         | Blank entries coded in as 99          |
| Maternal pre-eclampsia requiring pre-term birth (Y/N)<br>Maternal pre-eclampsia | PreEclampsia                | Where the following is true:<br>ProblemsDuringPregnancy = 31 THEN (1)                                                                                                                                                                                | 0 = No pre-eclampsia<br>1 = Pre-eclampsia present<br>99 = Unknown                       | Blank entries coded in as 99          |
| Maternal gestational hypertension (Y/N)                                         | MaternalGestHypTension      | Where the following is true:<br>ProblemsDuringPregnancy = 30 THEN (1)                                                                                                                                                                                | 0 = No gestational hypertension<br>1 = Gestational hypertension present<br>99 = Unknown | Blank entries coded in as 99          |
| Maternal prolonged rupture of membranes                                         | ROMTimeAnon                 | Derived (Minutes)                                                                                                                                                                                                                                    | Numeric                                                                                 | Number of minutes from birth to event |
|                                                                                 | Prolonged_ROM               | Where the following is true:<br>ProblemsDuringPregnancy = 20 THEN (1)                                                                                                                                                                                | 0 = No prolonged rupture<br>1 = Prolonged rupture present                               |                                       |
| Maternal suspected chorioamnionitis (Y/N)                                       | Chorioamnionitis            | Where the following is true:<br>MaternalPyrexialInLabour38c = 1 OR<br>IntrapartumAntibioticsGiven = 1 THEN (1)                                                                                                                                       | 0 = No<br>1 = Yes<br>9 = Unknown                                                        | Blank entries coded in as 9           |
| Intrapartum Antibiotics                                                         | IntrapartumAntibioticsGiven | IntrapartumAntibioticsGiven = 1 THEN (1)                                                                                                                                                                                                             | 0 = No<br>1 = Yes<br>9 = Unknown                                                        |                                       |
| Maternal pyrexia                                                                | MaternalPyrexialInLabour    | MaternalPyrexialInLabour38c = 1 THEN (1)                                                                                                                                                                                                             | 0 = No<br>1 = Yes<br>9 = Unknown                                                        |                                       |
| Maternal GBS                                                                    | MaternalGBS                 | ProblemsInfctPregnancyMother = Group B streptococcus THEN (1)                                                                                                                                                                                        | 0 = No<br>1 = Yes<br>9 = Unknown                                                        |                                       |
| Maternal receipt of antenatal steroids (Y/N)                                    | MaternalAntenatalSteroids   | Where the following is true:<br>SteroidsAntenatalGiven = 1 AND SteroidsAntenatalCourses = 1 THEN (1)<br>SteroidsAntenatalGiven = 1 AND SteroidsAntenatalCourses = 2 THEN (2)<br>SteroidsAntenatalGiven = 0 AND SteroidsAntenatalCourses = 0 THEN (0) | 0 = None given<br>1 = Complete<br>2 = Incomplete<br>9 = Unknown                         |                                       |
| Maternal receipt of antenatal magnesium sulphate (Y/N)                          | MagnesiumSulphate           | N/A                                                                                                                                                                                                                                                  | 0 = No<br>1 = Yes<br>9 = Unknown                                                        |                                       |

|                                                          |                            |                                                                                                                                                                                                                                       |                                                                                                                                |  |
|----------------------------------------------------------|----------------------------|---------------------------------------------------------------------------------------------------------------------------------------------------------------------------------------------------------------------------------------|--------------------------------------------------------------------------------------------------------------------------------|--|
| Delivery mode                                            | ModeOfDelivery             | Emergency caesarean = 1<br>Elective caesarean = 2<br>Vaginal spontaneous = 3                                                                                                                                                          | 1 = emergency<br>2 = elective<br>3 = vaginal<br>9 = unknown                                                                    |  |
| Induced delivery                                         | Onsetoflabour              | Spontaneous = 1<br>Induced (medical and/or surgical) = 2<br>None (i.e. caesarean) = 3                                                                                                                                                 | 1 = spontaneous<br>2 = Induced<br>3 = None<br>9 = unknown                                                                      |  |
| Labour before caesarean                                  | ModeofDelivery Caesarean   | Yes<br>No                                                                                                                                                                                                                             | 0 = no labour<br>1 = labour                                                                                                    |  |
| Delivery categories                                      | Delivery categories        | Categorize above:<br>Vaginal AND Spontaneous = 1<br>Vaginal AND Induced = 2<br>Emergency caesarean AND labour = 3<br>Emergency caesarean AND nolabour = 4<br>Elective caesarean AND labour = 5<br>Elective caesarean AND nolabour = 6 | 1 = VagSpon<br>2 = VagInduc<br>3 = EmergCaesLab<br>4 = EmergCaesNolab<br>5 = ElectCaesLab<br>6 = ElectCaesNolab<br>9 = unknown |  |
| Infant Apgar score at 1 minutes                          | apgar_1min                 | N/A                                                                                                                                                                                                                                   | 0-10 Apgar score<br>99 = Unknown                                                                                               |  |
| Infant Apgar score at 5 minutes                          | apgar_5min                 | N/A                                                                                                                                                                                                                                   | 0-10 Apgar score<br>99 = Unknown                                                                                               |  |
| Infant Apgar score at 10 minutes                         | apgar_10min                | N/A                                                                                                                                                                                                                                   | 0-10 Apgar score<br>99 = Unknown                                                                                               |  |
| Spontaneous respiration time of onset                    | SpontaneousRespirationTime | 1 <1 mins<br>2 1-1.5 mins<br>3 1.6-2 mins<br>4 2.1-3 mins<br>5 3.1-4 mins<br>6 4.1-5 mins<br>7 > 5mins                                                                                                                                |                                                                                                                                |  |
| Infant: chest compressions administered (Y/N)            | CardiacMassage             | Where the following is true:<br>MethodsOfResuscitation = 16 THEN (1)                                                                                                                                                                  | 0 = No cardiac massage<br>1 = Cardiac massage<br>99 = Unknown                                                                  |  |
| Infant: Intubation at delivery (Y/N)                     | IntubationDelivery         | Where the following is true:<br>MethodsOfResuscitation = 15 THEN (1)                                                                                                                                                                  | 0 = No intubation<br>1 = Intubation<br>99 = Unknown                                                                            |  |
| Infant: Ventilation at delivery (Y/N)                    | VentilationDelivery        | Where the following is true:<br>MethodsOfResuscitation = 14 THEN (1)                                                                                                                                                                  | 0 = No IPPV<br>1 = IPPV<br>99 = Unknown                                                                                        |  |
| Infant: Emergency resuscitation drugs administered (Y/N) | ResusDrugsAdmin            | Where the following is true:<br>MethodsOfResuscitation = 17 OR<br>MethodsOfResuscitation = 88 THEN (1)                                                                                                                                | 0 = No resuscitation drugs administered                                                                                        |  |

|                                       |                              |                                                                                                                                                                                                                                                                                                                |                                                                                                                                        |  |
|---------------------------------------|------------------------------|----------------------------------------------------------------------------------------------------------------------------------------------------------------------------------------------------------------------------------------------------------------------------------------------------------------|----------------------------------------------------------------------------------------------------------------------------------------|--|
|                                       |                              |                                                                                                                                                                                                                                                                                                                | 1 = Resuscitation drugs administered<br>99 = Unknown                                                                                   |  |
| Infant: Surfactant administered (Y/N) | SurfactantGivenResuscitation | N/A                                                                                                                                                                                                                                                                                                            | 0 = No<br>1 = Yes<br>9 = Unknown                                                                                                       |  |
| Infant: Umbilical cord pH             | CordPhArterial               | N/A                                                                                                                                                                                                                                                                                                            | 6.00-8.00<br>9.99 = Unknown                                                                                                            |  |
|                                       | CordVenousPH                 | N/A                                                                                                                                                                                                                                                                                                            | 6.00-8.00<br>9.99 = Unknown                                                                                                            |  |
| Umbilical cord lactate                | CordILactate                 |                                                                                                                                                                                                                                                                                                                |                                                                                                                                        |  |
| Umbilical cord base excess            | CordBE                       | Labour and Delivery Details UMBILICAL CORD BLOOD BASE EXCESS CONCENTRATION (ARTERIAL) Continuous OR if not available use Labour and Delivery Details UMBILICAL CORD BLOOD BASE EXCESS CONCENTRATION (VENOUS)                                                                                                   | CordBaseExcess:<br>Continuous (to 1 decimal place)<br>CordBaseExcessMs:<br>Binary missing indicator created (Not missing=0; Missing=1) |  |
| Base excess 12h worst                 | WorstBaseWithin12            |                                                                                                                                                                                                                                                                                                                |                                                                                                                                        |  |
| Blood transfusion day 1-2             | BloodProductsTrans           | On day 1 and day 2<br>Daily care blood transfusion BLOOD TRANSFUSION PRODUCT TYPE                                                                                                                                                                                                                              | 1 = yes<br>0 = no                                                                                                                      |  |
| Umbilical catheters                   | LinesIn                      | Only on day 1-2 (admission)<br><br>1 Peripheral arterial line<br>2 Umbilical arterial line if THEN YES<br>3 Umbilical venous line if THEN YES<br>4 Percutaneous central venous line (long line)<br>5 Surgically inserted central venous line<br>6 Peripheral venous line<br>9 Not Applicable/ No Lines in Situ | 1 = yes<br>0 = no<br><br>9 = unknown                                                                                                   |  |
| Birth place                           | PlaceofBirthNHSCode          |                                                                                                                                                                                                                                                                                                                | Organization code                                                                                                                      |  |
| Time to admission                     |                              | Admission Details CRITICAL CARE START YEAR AND MONTH and NUMBER OF MINUTES (BIRTH TO EVENT)                                                                                                                                                                                                                    |                                                                                                                                        |  |
| Assisted Ventilation                  |                              | On day 1-2                                                                                                                                                                                                                                                                                                     |                                                                                                                                        |  |
| Surfactant therapy                    |                              | On day 1-2                                                                                                                                                                                                                                                                                                     |                                                                                                                                        |  |
| Feeding advancement (early feeding)   |                              | 198:9<br>E.g. any of the following items entered in the Daily Care Fluids and Feeding during the first 3 days<br>• Any entry (1-6) under ENTERAL FEED TYPE GIVEN                                                                                                                                               | Dichotomous (No enteral feeds=0; provided enteral feeds=1)                                                                             |  |

1  
2  
3  
4  
5  
6  
7  
8  
9  
10  
11  
12  
13  
14  
15  
16  
17  
18  
19  
20  
21  
22  
23  
24  
25  
26  
27  
28  
29  
30  
31  
32  
33  
34  
35  
36  
37  
38  
39  
40  
41  
42  
43  
44  
45  
46

|                                                                   |                                |                                                                                                                                                                                                                                                                                                                                        |                                                                                                                                                                  |                                |
|-------------------------------------------------------------------|--------------------------------|----------------------------------------------------------------------------------------------------------------------------------------------------------------------------------------------------------------------------------------------------------------------------------------------------------------------------------------|------------------------------------------------------------------------------------------------------------------------------------------------------------------|--------------------------------|
|                                                                   |                                | <ul style="list-style-type: none"> <li>• OR any entry (0-88) under FORMULA MILK OR MILK FORTIFIER TYPE</li> <li>• OR any value &gt;0 for TOTAL VOLUME OF MILK RECEIVED</li> <li>• OR any entry (1-8) under ENTERAL FEEDING METHOD</li> </ul> <p>NO ENTERAL FEEDING GROUP DEFINED AS All other babies not fulfilling above criteria</p> |                                                                                                                                                                  |                                |
| Feeding                                                           |                                | <p>On day 1-2</p> <ol style="list-style-type: none"> <li>1 Suckling at the breast</li> <li>2 Mother's fresh expressed breast milk</li> <li>3 Mother's frozen expressed breast milk</li> <li>4 Donor expressed breast milk</li> <li>5 Breast milk fortifier</li> <li>6 Formula</li> <li>9 Not applicable (Nil by mouth)</li> </ol>      | <p>1 = Formula<br/>2 = Human milk<br/>3 = Mix ?<br/>0 = nil</p> <p>9 = unknown</p>                                                                               |                                |
| Probiotics                                                        |                                | On day 1-2                                                                                                                                                                                                                                                                                                                             | <p>1 = yes<br/>0 = no</p>                                                                                                                                        |                                |
| Fluids and feeding: Parenteral nutrition today (partial or total) | ParenteralNutrition            | PN on day1-2                                                                                                                                                                                                                                                                                                                           | <p>1= yes<br/>0 = no</p>                                                                                                                                         |                                |
| Unit of first admission                                           | ProviderNHSCode                | N/A                                                                                                                                                                                                                                                                                                                                    | <p>xxxxx - NHS organisational code<br/>ZZ210 - non-NHS England and Wales organisation (private/N.Ireland/Scotland)<br/>ZZ203 – Not known<br/>ZZ999 - Missing</p> |                                |
| Infant: Admission temperature                                     | FirstAdmitTemperature          | N/A                                                                                                                                                                                                                                                                                                                                    | <p>24-45<br/>77.7 = Not Recordable</p>                                                                                                                           | Measurement at first admission |
| Infant: Admission mean blood pressure                             | FirstAdmissionBP               | N/A                                                                                                                                                                                                                                                                                                                                    | <p>10-150<br/>999 = Unknown</p>                                                                                                                                  | Measurement at first admission |
| Infant: Admission blood glucose                                   | FirstAdmissionBloodGlucose     | N/A                                                                                                                                                                                                                                                                                                                                    | <p>0.0-50.0<br/>99.9 = Unknown</p>                                                                                                                               | Measurement at first admission |
| Infant: Admission heart rate                                      | FirstAdmissionHR               | N/A                                                                                                                                                                                                                                                                                                                                    | <p>50-350<br/>999 = Unknown</p>                                                                                                                                  | Measurement at first admission |
| Infant: Admission oxygen saturation                               | FirstAdmissionOxygenSaturation | N/A                                                                                                                                                                                                                                                                                                                                    | <p>10-100<br/>999 = Unknown</p>                                                                                                                                  | Measurement at first admission |

|                                                                |                                                    |                                                              |                                                                                                                                                                                                                                                                                                |                                                                                                      |                             |
|----------------------------------------------------------------|----------------------------------------------------|--------------------------------------------------------------|------------------------------------------------------------------------------------------------------------------------------------------------------------------------------------------------------------------------------------------------------------------------------------------------|------------------------------------------------------------------------------------------------------|-----------------------------|
| 1<br>2<br>3<br>4<br>5<br>6                                     | Infant: Surfactant administered on first day (Y/N) | SurfactantGivenFirstDays                                     | Where the following is true:<br>DayDateAnon in first day of life AND first full day in unit<br>AND<br>SurfactantGiven = 1 THEN (Y)                                                                                                                                                             | 0 = No<br>1 = Yes<br>9 = Unknown                                                                     |                             |
| 7<br>8<br>9<br>10<br>11                                        | Infant: Mechanical ventilation on first day (Y/N)  | RespiratorySupportFirstDays                                  | Where the following is true:<br>DayDateAnon in first day of life AND first full day in unit<br>AND<br>RespiratorySupport = 1 OR<br>AddedO2 = 11 OR<br>VentilationMode >= 1 THEN (1)                                                                                                            | 0 = No mechanical ventilation on first day<br>1 = Mechanical ventilation on first day<br>9 = Unknown | Blank entries coded as 9    |
| 12<br>13<br>14<br>15<br>16<br>17<br>18<br>19<br>20<br>21<br>22 | Infant: Inotropes administered on first day (Y/N)  | InotropesFirstDays                                           | Where the following is true:<br>DayDateAnon in first day of life AND first full day in unit<br>AND<br>DailyDrugs in<br>500098 Dopamine<br>500096 Dobutamine<br>500056 Adrenaline<br>500210 Noradrenaline<br>500116 Hydrocortisone<br>1010173 Milrinone<br>OR<br>InotropesGiven = 1<br>THEN (Y) | 0 = No<br>1 = Yes, Inotropes given today<br>9 = Unknown                                              | Blank entries coded in as 9 |
| 23<br>24<br>25<br>26<br>27<br>28                               | Hemodynamically significant PDA                    | PDA                                                          | Treated on day 1-2<br>Yes/No                                                                                                                                                                                                                                                                   |                                                                                                      |                             |
| 29<br>30<br>31                                                 |                                                    | Cardiovascular: Treatment for patent ductus arteriosus (PDA) | 1 Indometacin/Indomethacin<br>2 Ibuprofen<br>3 Surgery<br>9 Not applicable                                                                                                                                                                                                                     |                                                                                                      |                             |
| 32<br>33<br>34                                                 | Neurology: Central tone                            | Centraltone                                                  | At admission (On day 1-2)<br>1 Normal<br>2 Increased<br>3 Decreased                                                                                                                                                                                                                            | 0 = normal<br>1 = abnormal incl floppy                                                               |                             |
| 35<br>36<br>37                                                 | Admission: Time of cord clamping                   | CordClamp                                                    | Cord clamped immediately after birth                                                                                                                                                                                                                                                           | 0 = No<br>1 = Yes<br>9 = Unknown                                                                     |                             |
| 38<br>39<br>40<br>41<br>42<br>43<br>44<br>45<br>46             | Infant: Transfer on first day (Y/N)                | TransferOnFirstDay                                           | Where the following is true:<br>AdmitTimeAnon <= 1440 AND<br>DischTimeAnon <= 1440 AND<br>DischargeDestination does not equal 3 AND<br>ProviderCode is different from POBCode AND<br>EpisodeNumberBaby = 2 THEN (1)                                                                            | 0 = No<br>1 = Yes<br>9 = Unknown                                                                     |                             |



1  
2  
3  
4  
5  
6  
7  
8  
9  
10  
11  
12  
13  
14  
15  
16  
17  
18  
19  
20  
21  
22  
23  
24  
25  
26  
27  
28  
29  
30  
31  
32  
33  
34  
35  
36  
37  
38  
39  
40  
41  
42  
43  
44  
45  
46

|                                |                     |                                                                                                                                                                                                                                                                                         |                                                                                                                                                        |  |
|--------------------------------|---------------------|-----------------------------------------------------------------------------------------------------------------------------------------------------------------------------------------------------------------------------------------------------------------------------------------|--------------------------------------------------------------------------------------------------------------------------------------------------------|--|
|                                |                     | Same as:<br>Admission Details SITE CODE (OF ADMITTING NEONATAL UNIT) or ORGANISATION CODE (OF ADMITTING NEONATAL UNIT) Different from Baby Demographics SITE CODE (OF ACTUAL PLACE OF DELIVERY) or ORGANISATION CODE (OF ACTUAL PLACE OF DELIVERY) And Baby Demographics EPISODE NUMBER |                                                                                                                                                        |  |
|                                | TransferDestination | Derived from ProviderNHSCode                                                                                                                                                                                                                                                            | xxxxx - NHS organisational code<br>ZZ210 - non-NHS England and Wales organisation (private/N.Ireland/Scotland)<br>ZZ203 – Not known<br>ZZ999 - Missing |  |
| Level of initial neonatal unit | POBLevel            | Derived from POBNHSCode                                                                                                                                                                                                                                                                 | 0 = Non-NNU<br>1 = SCU<br>2 = LNU<br>3 = NICU                                                                                                          |  |
| Neonatal network               | POBNetwork          | Derived from POBNHSCode                                                                                                                                                                                                                                                                 | Text                                                                                                                                                   |  |

**Additional outcomes**

|                         |                    |                                                                                                               |                                                                                                                                           |                                              |
|-------------------------|--------------------|---------------------------------------------------------------------------------------------------------------|-------------------------------------------------------------------------------------------------------------------------------------------|----------------------------------------------|
| Brain injury on imaging | BrainInjuryImaging | Where the following is true:<br>LeftIVH OR RightIVH >= 3<br>OR<br>PVL = Y THEN (1)                            | 0 = No brain injury on imaging<br>1 = Brain injury on imaging<br>9 = Unknown                                                              | Blank entries coded as 9                     |
| Treated ROP             | Treated_ROP        | Where the following is true:<br>ROPSurgery = 1 OR<br>RightEyeSurgery = 1,2,3,4 OR<br>LeftEyeSurgery = 1,2,3,4 | 0 = No treatment<br>1 = Treatment given                                                                                                   |                                              |
| Maximum stage of ROP    | Max_ROP            | N/A                                                                                                           | 0 – No ROP<br>1 – Stage 1 ROP<br>2 - Stage 2 ROP<br>3 – Stage 3 ROP<br>4 – Stage 4 ROP<br>5 – Stage 5 ROP<br>A – Aggressive posterior ROP | The maximum stage between right and left eye |

|                                                       |                         |                                                                                                                                                                                                                                                                                                                                                                                                      |                                                                                                    |                                |
|-------------------------------------------------------|-------------------------|------------------------------------------------------------------------------------------------------------------------------------------------------------------------------------------------------------------------------------------------------------------------------------------------------------------------------------------------------------------------------------------------------|----------------------------------------------------------------------------------------------------|--------------------------------|
| Bronchopulmonary dysplasia                            | BPD                     | Where the following is true:<br>CGA = 36 calculated from GestationWeeks and GestationDays<br>AND<br>RespiratorySupport = 1 OR<br>VentilationMode >= 1 OR<br>AddedO2 > 0 THEN (1)                                                                                                                                                                                                                     | 0 = No respiratory support given at 36 weeks<br>1 = Respiratory support at 36 weeks<br>9 = Unknown | Blank entries coded as 9       |
| Need for surgical procedures (possible more than one) | SurgicalProcedures      | Where the following is true:<br>PrincipleProceduresDuringStay =<br>100033 Surgery for meconium ileus (von)<br>100076 Skin or soft tissue surgery requiring general or spinal anaesthesia (Description Required)<br>11222 Closure of small intestine/ileal perforation<br>11501 Laparoscopy<br>11904 Colostomy<br>11905 Ileostomy<br>1010826 Major surgery<br>OR<br>MajorSurgeryToday = Y<br>THEN (1) | 0 = No<br>1 = Yes<br>9 = Unknown                                                                   | Blank entries coded as 9       |
| Seizures                                              | Seizures                | Where the following is true:<br>PrincipalDiagnosisAtDischarge = 10957 Seizures<br>15192 Seizure disorder<br>15194 Seizure disorder (cause unknown)<br>15195 Status epilepticus<br>15848 Seizures<br>OR<br>Convulsions = 1 THEN (1)                                                                                                                                                                   | 0 = None<br>1 = Seizures at discharge<br>9 = Unknown                                               | Blank entries coded as 9       |
| Weight at 36 weeks corrected gestational age (CGA)    | CGA_weight              | Where the following is true:<br>DayWorkingWeight at 36 weeks (+/- 3 days) CGA                                                                                                                                                                                                                                                                                                                        | Numeric (g)<br>99999 = Unknown                                                                     | Accepted range:<br>001 – 9998g |
| Exact CGA on day of measurement                       | CGA_exact               | Calculated from DayDateAnon and GestationWeeks and GestationDays                                                                                                                                                                                                                                                                                                                                     | Numeric                                                                                            |                                |
| Weight at discharge                                   | DischWeightFinalEps     | DayWorkingWeight on the last day of the last episode                                                                                                                                                                                                                                                                                                                                                 | Numeric (g)<br>99999 = Unknown                                                                     | Accepted range:<br>001 – 9998g |
| Weight SDS at discharge                               |                         | Defined as the following data item on the final day of neonatal care: • Daily Care General Information PERSON WEIGHT IN GRAMS<br>If final day is not entered, the penultimate day is used                                                                                                                                                                                                            | Continuous                                                                                         |                                |
| Head circumference at discharge                       | DischHeadCircumFinalEps | DayHeadCirc on the last day of the last episode                                                                                                                                                                                                                                                                                                                                                      | Numeric (cm)<br>99.9 = Unknown                                                                     |                                |
| CGA day of discharge                                  | CGA_DischFinalEps       | Calculated from DayDateAnon and GestationWeeks of the last episode                                                                                                                                                                                                                                                                                                                                   | Numeric                                                                                            |                                |

1  
2  
3  
4  
5  
6  
7  
8  
9  
10  
11  
12  
13  
14  
15  
16  
17  
18  
19  
20  
21  
22  
23  
24  
25  
26  
27  
28  
29  
30  
31  
32  
33  
34  
35  
36  
37  
38  
39  
40  
41  
42  
43  
44  
45  
46

|                                                                         |                                  |                                                                                                                                       |                                                             |  |
|-------------------------------------------------------------------------|----------------------------------|---------------------------------------------------------------------------------------------------------------------------------------|-------------------------------------------------------------|--|
| Blindness                                                               | Vision_impairment                | Where the following is true:<br>Vision_visual_problems = 1 OR<br>vision_defect_not_correctable<br>= 1 OR<br>Vision_blind = 1 THEN (1) | 0 = No<br>1 = Yes<br>9 = Unknown                            |  |
| Deafness                                                                | auditory_hearing_impairment      | N/A                                                                                                                                   | 0 = No<br>1 = Yes<br>9 = Unknown                            |  |
| Ability to walk                                                         | neuromotor_unable_walk_without_a | N/A                                                                                                                                   | 0 = No<br>1 = Yes<br>9 = Unknown                            |  |
| Exclusions for congenital gastrointestinal malformations                | Exclusions_Malformations         | Where the following is true:<br>Diagnosis table code in eTable1 THEN (1)                                                              | 0 = No, none of the listed malformations present<br>1 = Yes |  |
| Exclusions for life-limiting conditions or conditions requiring surgery | Exclusions_LifeLimitingOrSurgery | Where the following is true:<br>Diagnosis table code in eTable2 THEN (1)                                                              | 0 = No, none of the conditions present<br>1 = Yes           |  |
| Clinical diagnoses at discharge                                         | DiagnosesAtDischarge             | ICD-10 and/or SNOMED CT<br>Can be derived from daily records.<br>[Secondary/exploratory outcomes]                                     | For each selected outcome<br>0=No<br>1=Yes                  |  |
|                                                                         |                                  |                                                                                                                                       |                                                             |  |

For peer review only

## Appendix 2. DAG code for dagitty.net (for direct insertion on website browser platform)

```

1 dag {
2   bb="0,0,1,1"
3
4   "Abruptio/bleeding" [latent,pos="0.146,0.569"]
5   "Anemia/Transfusion" [pos="0.304,0.710"]
6   "Antenatal steroids" [pos="0.571,0.355"]
7   "Assisted ventilation" [pos="0.372,0.734"]
8   "Clinical signs" [adjusted,pos="0.395,0.643"]
9   "Delivery mode and C-section type" [adjusted,pos="0.488,0.294"]
10  "Feeding initiation" [pos="0.544,0.773"]
11  "Fetal flow" [latent,pos="0.276,0.465"]
12  "Formula feeding" [pos="0.469,0.788"]
13  "Maternal antibiotics " [pos="0.491,0.203"]
14  "Maternal infection" [adjusted,pos="0.148,0.457"]
15  "Probiotic initiation" [pos="0.625,0.754"]
16  "Site/outborn" [adjusted,pos="0.516,0.648"]
17  "Surfactant therapy" [pos="0.367,0.806"]
18  "Umbilical catheters" [pos="0.241,0.736"]
19  AB [exposure,pos="0.510,0.486"]
20  BW [adjusted,pos="0.434,0.486"]
21  Dyscolonization [latent,pos="0.556,0.261"]
22  Ethnicity [pos="0.252,0.204"]
23  GA [adjusted,pos="0.409,0.385"]
24  GDM [pos="0.386,0.068"]
25  IUGR [adjusted,pos="0.361,0.484"]
26  Ischemia [latent,pos="0.304,0.632"]
27  Multiplicity [pos="0.311,0.209"]
28  NEC [outcome,pos="0.609,0.483"]
29  PDA [pos="0.217,0.667"]
30  Parity [pos="0.290,0.143"]
31  Preeclampsia [pos="0.413,0.250"]
32  SES [pos="0.309,0.047"]
33  Sepsis [pos="0.227,0.567"]
34  Sex [pos="0.239,0.272"]
35  Smoking [pos="0.337,0.097"]
36  "Abruptio/bleeding" -> "Anemia/Transfusion" [pos="0.243,0.615"]
37  "Abruptio/bleeding" -> Ischemia
38  "Anemia/Transfusion" -> Ischemia
39  "Anemia/Transfusion" -> NEC
40  "Antenatal steroids" -> "Clinical signs" [pos="0.489,0.410"]
41  "Antenatal steroids" -> NEC
42  "Assisted ventilation" -> "Surfactant therapy"
43  "Assisted ventilation" -> NEC
44  "Clinical signs" -> "Assisted ventilation"
45  "Clinical signs" -> AB [pos="0.386,0.578"]
46  "Clinical signs" -> NEC [pos="0.423,0.577"]
47  "Delivery mode and C-section type" -> "Antenatal steroids"
48  "Delivery mode and C-section type" -> AB
49  "Delivery mode and C-section type" -> Dyscolonization
50  "Delivery mode and C-section type" -> GA
51  "Delivery mode and C-section type" -> NEC
52  "Feeding initiation" -> NEC [pos="0.601,0.675"]

```

## Appendix 2. DAG code for dagitty.net (for direct insertion on website browser platform)

```

1 "Fetal flow" -> "Delivery mode and C-section type"
2 [pos="0.261,0.334"]
3
4 "Fetal flow" -> IUGR
5
6 "Fetal flow" -> NEC [pos="0.385,0.603"]
7
8 "Formula feeding" -> NEC [pos="0.555,0.719"]
9
10 "Maternal antibiotics " -> Dyscolonization
11 "Maternal antibiotics " -> NEC [pos="0.642,0.236"]
12 "Maternal infection" -> "Clinical signs" [pos="0.362,0.575"]
13 "Maternal infection" -> "Delivery mode and C-section type"
14 [pos="0.238,0.289"]
15 "Maternal infection" -> "Maternal antibiotics " [pos="0.229,0.267"]
16 "Maternal infection" -> AB [pos="0.322,0.356"]
17 "Maternal infection" -> NEC [pos="0.575,0.705"]
18 "Maternal infection" -> Sepsis
19 "Probiotic initiation" -> NEC [pos="0.639,0.652"]
20
21 "Site/outborn" -> "Clinical signs"
22 "Site/outborn" -> "Feeding initiation"
23 "Site/outborn" -> "Formula feeding"
24 "Site/outborn" -> "Probiotic initiation"
25 "Site/outborn" -> AB
26 "Site/outborn" -> NEC
27
28 "Surfactant therapy" -> NEC
29
30 "Umbilical catheters" -> Ischemia
31
32 AB -> NEC
33 BW -> AB
34 BW -> NEC [pos="0.526,0.569"]
35 Dyscolonization -> NEC [pos="0.604,0.306"]
36 Ethnicity -> NEC [pos="0.720,0.028"]
37 GA -> "Antenatal steroids"
38 GA -> AB
39 GA -> BW
40 GA -> NEC
41 GDM -> NEC [pos="0.806,0.106"]
42 IUGR -> "Delivery mode and C-section type" [pos="0.319,0.358"]
43 IUGR -> BW
44 IUGR -> NEC [pos="0.512,0.614"]
45 Ischemia -> "Clinical signs"
46 Ischemia -> NEC
47 Multiplicity -> NEC [pos="0.697,0.057"]
48 PDA -> Ischemia
49 Parity -> NEC [pos="0.756,0.077"]
50 Preeclampsia -> "Delivery mode and C-section type"
51 SES -> GDM
52 SES -> NEC [pos="0.852,0.023"]
53 SES -> Smoking
54 Sepsis -> "Clinical signs" [pos="0.346,0.586"]
55 Sepsis -> Ischemia
56 Sepsis -> NEC [pos="0.478,0.596"]
57 Sex -> NEC [pos="0.690,0.026"]
58 Smoking -> NEC [pos="0.780,0.096"]
59 }
60

```

# BMJ Open

## Early antibiotic use and incidence of necrotising enterocolitis in very preterm infants: a protocol for a UK based observational study using routinely recorded data

|                                 |                                                                                                                                                                                                                                                                                                                                                                                                                                                                                                                                                                                                                                                                                                                                                                                                                                                    |
|---------------------------------|----------------------------------------------------------------------------------------------------------------------------------------------------------------------------------------------------------------------------------------------------------------------------------------------------------------------------------------------------------------------------------------------------------------------------------------------------------------------------------------------------------------------------------------------------------------------------------------------------------------------------------------------------------------------------------------------------------------------------------------------------------------------------------------------------------------------------------------------------|
| Journal:                        | <i>BMJ Open</i>                                                                                                                                                                                                                                                                                                                                                                                                                                                                                                                                                                                                                                                                                                                                                                                                                                    |
| Manuscript ID                   | bmjopen-2022-065934.R1                                                                                                                                                                                                                                                                                                                                                                                                                                                                                                                                                                                                                                                                                                                                                                                                                             |
| Article Type:                   | Protocol                                                                                                                                                                                                                                                                                                                                                                                                                                                                                                                                                                                                                                                                                                                                                                                                                                           |
| Date Submitted by the Author:   | 09-Sep-2022                                                                                                                                                                                                                                                                                                                                                                                                                                                                                                                                                                                                                                                                                                                                                                                                                                        |
| Complete List of Authors:       | Shen, Rene; University of Copenhagen, Comparative Pediatrics and Nutrition<br>Embleton, Nicholas ; Newcastle Upon Tyne Hospitals NHS Foundation Trust, Neonatology ; Newcastle University Faculty of Medical Sciences, Population Health Sciences<br>Lyng Forman, Julie ; University of Copenhagen, Biostatistics<br>Gale, Chris; Imperial College London, Neonatal Medicine, School of Public Health<br>Griesen, Gorm; Odense University Hospital, Neonatology<br>Sangild, Per; University of Copenhagen, Comparative Pediatrics and Nutrition; Rigshospitalet, Department of Neonatology<br>Uthaya, Sabita; Imperial College London, Faculty of Medicine<br>Berrington, Janet; Newcastle Upon Tyne Hospitals NHS Foundation Trust, Neonatology ; Newcastle University Faculty of Medical Sciences, Clinical and Translational Research Institute |
| <b>Primary Subject Heading</b>: | Paediatrics                                                                                                                                                                                                                                                                                                                                                                                                                                                                                                                                                                                                                                                                                                                                                                                                                                        |
| Secondary Subject Heading:      | Paediatrics, Reproductive medicine                                                                                                                                                                                                                                                                                                                                                                                                                                                                                                                                                                                                                                                                                                                                                                                                                 |
| Keywords:                       | Neonatal intensive & critical care < INTENSIVE & CRITICAL CARE, Paediatric gastroenterology < GASTROENTEROLOGY, BACTERIOLOGY                                                                                                                                                                                                                                                                                                                                                                                                                                                                                                                                                                                                                                                                                                                       |
|                                 |                                                                                                                                                                                                                                                                                                                                                                                                                                                                                                                                                                                                                                                                                                                                                                                                                                                    |

SCHOLARONE™  
Manuscripts

1  
2  
3 1 **Early antibiotic use and incidence of necrotising enterocolitis in very preterm infants: a protocol**  
4  
5 2 **for a UK based observational study using routinely recorded data**  
6

7  
8 3 René Shen<sup>1</sup>, Nicholas Embleton<sup>2,3</sup>, Julie Forman<sup>4</sup>, Chris Gale<sup>5</sup>, Gorm Greisen<sup>6</sup>, Per Torp

9  
10 4 Sangild<sup>1,6,7</sup>, Sabita Uthaya<sup>8</sup>, Janet Berrington<sup>2,9</sup>

11  
12 5 1 Comparative Pediatrics and Nutrition, Faculty of Health and Medical Sciences, University  
13  
14 of Copenhagen  
15

16  
17 7 2 Neonatal department, Newcastle upon Tyne Hospitals NHS Foundation Trust, Richardson  
18  
19 Road, Newcastle, NE7 7DN, UK  
20

21  
22 9 3 . Population Health Sciences Institute, Newcastle University, Newcastle upon Tyne, UK  
23

24  
25 10 4 Section of Biostatistics, Dept. of Public Health, University of Copenhagen  
26

27  
28 11 5 School of Public Health, Faculty of Medicine, Chelsea and Westminster Hospital campus,  
29  
30 Imperial College London

31  
32 13 6 Dept. of Neonatology, Copenhagen University Hospital  
33

34  
35 14 7 Dept. of Pediatrics, Odense University Hospital, Odense, Denmark  
36

37  
38 15 8 School of Public Health, Faculty of Medicine, Chelsea and Westminster Hospital campus,  
39  
40 Imperial College London

41  
42 17 9 Clinical and Translational Research Institute, University of Newcastle, UK  
43

44  
45 18

46  
47 19 Corresponding author Janet Berrington, Neonatal department, Newcastle upon Tyne

48  
49 20 Hospitals NHS Foundation Trust, Richardson Road, Newcastle, NE7 7DN, UK email:

50  
51 21 [janet.berrington1@nhs.net](mailto:janet.berrington1@nhs.net)  
52

53  
54 22

55  
56 23 **Word count:** 2631

57  
58 24 **Keywords:** neonatal intensive and critical care, paediatric gastroenterology, bacteriology  
59

60  
61 25 **Trial registration number:** ISRCTN Pending

1

## 2 **ABSTRACT**

### 3 **Introduction**

4 Necrotising enterocolitis (NEC) remains a major contributor to preterm mortality and  
5 morbidity. Prolonged duration of antibiotic therapy after delivery is associated with later  
6 NEC development but recent evidence suggests that absence of antibiotic treatment after  
7 delivery may also increase NEC risk. We will explore this controversy using a large pre-  
8 existing dataset of preterm infants in the United Kingdom (UK).

### 9 **Methods and analysis**

10 This is a retrospective cohort study using data from UK National Neonatal Research  
11 Database (NNRD) for infants born 01/01/2012 to 31/12/2020. Eligible infants will be <32  
12 weeks gestation, alive on day three. Primary outcome is development of severe NEC,  
13 compared in infants receiving early antibiotics (days 1-2 after birth) and those not. Subgroup  
14 analysis on duration of early antibiotic exposure will also occur. Secondary outcomes are:  
15 late onset sepsis (LOS), total antibiotic use, pre-discharge mortality, retinopathy of  
16 prematurity (ROP), intraventricular haemorrhage (IVH), bronchopulmonary dysplasia (BPD),  
17 focal intestinal perforation and any abdominal surgery. To address competing risks, incidence  
18 of death before day 7, 14 and 28 will be analysed. We will perform logistic regression and  
19 propensity score matched analyses. Statistical analyses will be guided by NEC risk factors,  
20 exposures and outcome presented in a causal diagram. These covariates include but are not  
21 limited to gestational age, birth weight, small for gestational age (SGA), sex, ethnicity,  
22 delivery mode, delivery without labour, Apgar score, early feeding and probiotic use.  
23 Sensitivity analyses of alternate NEC definitions, specific antibiotics and time of initiation  
24 will occur.

### 25 **Ethics and dissemination**



1 We will use de-identified data from NNRD, which holds permissions for the original data,  
2 from which parents can opt out and seek study- specific Research Ethics approval. The  
3 results will help to determine optimal use of early antibiotics for very preterm infants.

#### 4 **Implications**

5 This data will help optimise early antibiotic use in preterm infants.  
6

## 7 **ARTICLE SUMMARY**

### 8 **Strengths and limitations of the study**

9 Strengths:

- 10 • Use of the NNRD gives access to a very large dataset of preterm infants
- 11 • The primary outcome (NEC) and the many contributory covariates are routinely  
12 recorded in this dataset
- 13 • Analysis by both regression and using propensity matching optimises learning from  
14 this large dataset

15 Limitations:

- 16 • Data entry may not always be as accurate as that collected specifically within a trial
- 17 • The diagnosis of NEC has no gold standard to allow standardisation across units

## 1 INTRODUCTION

2  
3  
4  
5  
6  
7  
8  
9  
10  
11  
12  
13  
14  
15  
16  
17  
18  
19  
20  
21  
22  
23  
24  
25  
26  
27  
28  
29  
30  
31  
32  
33  
34  
35  
36  
37  
38  
39  
40  
41  
42  
43  
44  
45  
46  
47  
48  
49  
50  
51  
52  
53  
54  
55  
56  
57  
58  
59  
60

Around 3% of all babies are born very preterm (VPT, <32 weeks' gestation) and they require prolonged hospital stay, commonly including intensive care. Survival in these VPT infants (VPTI) has increased dramatically in recent years, but death is still common (~10% overall) as are life-long physical and cognitive impairment.[1] In the UK around 10,000 VPTI are born every year, representing an annual cost to the NHS of ~£3 billion.[2] The commonest cause of death or serious illness in preterm infants after the first few days are gut or infectious complications such as necrotising enterocolitis (NEC) or late onset sepsis (LOS).[3] Although knowledge around NEC, and preventive practices such as use of mothers own milk (MOM), donor human milk (DHM) and probiotics are increasing, there has been little reduction in NEC incidence over recent years[4,5], and mechanisms underlying the development of NEC are poorly understood. Antibiotic use as part of neonatal intensive care is common, particularly immediately after birth when infection is implicated in preterm delivery – studies show more than half of infants weighing <1000g routinely received more than 5 days antibiotics at birth[6]. Antibiotic use in VPTI has been implicated in NEC development in several ways. Studies show an increase in NEC incidence with increased duration of empirical early antibiotics[7,8] and alteration of the gut microbiota (dysbiosis) has been mechanistically linked to NEC development [9]. However recent observational data from 13 NICUs from 5 continents (n=2831) identified that NEC incidence was higher in infants who did not receive empirical antibiotics early after birth, despite higher gestational age, compared to those receiving them (OR: 1.8 (95% CI 1.1-2.9), with even higher odds ratio when adjusted for relevant confounders (OR: 4.0 (95% CI 2.1-7.3)) [10]. In contrast, results from a very recent study in preterm infants with low risk of infection shows opposite trends of lower odds in those not treated, but is underpowered for NEC as outcome (n=641, OR:0.7 (95%CI 0.3-1.5))[11]. There is increasing focus on antibiotic stewardship, and it can be

1 expected that the proportion of infants that are not given antibiotics after preterm birth will  
2 increase in the coming years. Therefore, it is important to know if lower early usage of  
3 antibiotics will increase the incidence of NEC. While there have been calls for a trial of  
4 routine early antibiotic treatment[12] in very preterm babies, and a single trial has so far  
5 attempted to do this, there are important logistical difficulties[13] with such an approach.  
6 The National Neonatal Research Database (NNRD) provides a large, population level dataset  
7 that can be used to further test the hypothesis that early empiric antibiotic treatment reduces  
8 the incidence of NEC in preterm infants, and allows adjustment for confounding through the  
9 large number of patient level covariates recorded in the NNRD.

## 10 **METHODS AND ANALYSIS**

### 11 **Design**

12 Retrospective cohort study using routinely recorded clinical data held in the NNRD.

### 13 **Data source**

14 NNRD holds data from all infants admitted to National Health Service (NHS) neonatal units  
15 in England and Wales from around 90,000 infants annually. Neonatal units in England and  
16 Wales have contributed data since 2012. Data are entered by contributing units to a point-of-  
17 care electronic dataset and a defined dataset is extracted by NNRD. Data is extracted  
18 quarterly and sent to the Neonatal Data Analysis Unit (NDAU), based at Imperial College,  
19 London [14]. The data includes variables pertinent to the present analysis, including  
20 demographics, exposure and outcome variables.

### 21 **Eligibility criteria**

22 Eligible infants must have been born at <32 weeks gestation, be cared for in a unit  
23 contributing data to NNRD, and be alive at day 3. Infants will be excluded if they have a  
24 known severe congenital or gastro-intestinal anomaly (excluding the presence of a patent  
25 ductus arteriosus, eTable 1 and 2) or have had abdominal surgery before day 3.

1  
2  
3 **1 Time period**  
4

5 2 Infants born between 01/01/2012 and 31/12/2020 will be included.  
6

7  
8 **3 Setting**  
9

10 4 UK neonatal units in England and Wales contributing to NNRD.  
11  
12 5

13  
14  
15 **6 Definitions**  
16

17 7 Exposure (primary)

18 8 Receipt of any intravenous antibiotic drug (Appendix 1) for any of the first 2 days after birth.  
19

20 9 Comparator: Did not receive any antibiotics for any of the first 2 days after birth.  
21  
22

23  
24 10 Primary outcomes

25 11 Severe NEC resulting in death or surgery as defined by Battersby[4].  
26  
27

28 12 Secondary outcomes

29 13 Secondary outcomes for analysis are the effects of early antibiotic exposure on  
30

31 14 1. Late onset sepsis (blood stream or cerebrospinal fluid (CSF) confirmed pure growth in  
32  
33 culture (National Neonatal Audit Programme (NNAP) definition) after first 3 days and/or  
34  
35 treatment with 5 days of antibiotics and a concurrent diagnosis of infection after the first 3  
36  
37 days)  
38  
39

40 17  
41 18 2. Total antibiotic use (number of days with any treatment of antibiotics during  
42  
43 admission)  
44  
45

46 19  
47 20 3. Length of stay (postnatal age at discharge or death)  
48

49 21 4. Time to reach full feeding (first day of 3 consecutive days where parenteral nutrition  
50  
51 or intravenous fluid are not recorded  
52

53 22  
54 23 5. Growth (change in standard deviation score between birth and 36 weeks and  
55  
56 discharge)  
57

58 24  
59 25 Further, we will analyse effects on some relevant adverse outcomes:  
60

- 1  
2  
3 1 6. Total pre-discharge mortality  
4  
5 2 7. Death prior to day 7, day 14, day 28  
6  
7 3 8. Bronchopulmonary dysplasia (respiratory support given at 36 weeks)  
8  
9 4 9. Retinopathy of prematurity (ROP) (received treatment for ROP, according to NNRD  
10  
11 definition)  
12  
13 5 10. Brain injury (Intraventricular haemorrhage grade 3 or above or cystic leucomalacia  
14  
15 6 10. Brain injury (Intraventricular haemorrhage grade 3 or above or cystic leucomalacia  
16  
17 7 diagnoses recorded)  
18  
19 8 11. Need for surgical procedures (Appendix 1)  
20  
21 9 Comparison of different durations of early antibiotic exposure will be performed based on the  
22  
23 10 following categories:  
24  
25 11 • Antibiotic duration no longer than 3 days  
26  
27 12 • Antibiotic duration 3-5 days  
28  
29 13 • Antibiotic duration longer than 5 days without positive culture (blood stream or CSF  
30  
31 confirmed pure growth in culture (NNAP definition) in the first 3 days.  
32  
33 14 For the above analyses, infants with a positive blood or CSF culture in the first 3 days will be  
34  
35 15 excluded.  
36  
37 16 A specific subgroup of interest are the infants that are considered to have low risk of early  
38  
39 17 onset sepsis (EOS), specified as fulfilling all of the following prenatal characteristics: no  
40  
41 18 premature rupture of membranes (PROM), no labour and no (suspected) chorioamnionitis.  
42  
43 19 Additional subgroup analyses will be performed for infants with gestation age <28 weeks and  
44  
45 20 birth weight <1000g.  
46  
47 21  
48  
49 22 **Sample size**  
50  
51 23 Observed NEC incidence noted in a previous study on a total 2831 infants from five different  
52  
53 24 continents, using criteria for NEC diagnosis in keeping with pragmatically defined NEC, was  
54  
55 25 9% when early antibiotic treatment was absent and 4% when antibiotic was provided in the  
56  
57  
58  
59  
60

1 first three days[10]. We hypothesise to find a similar antibiotic related proportional reduction  
 2 in incidence of severe NEC in this study, based on data collected over nine years (2012-2020)  
 3 from around 45,000 infants. In an earlier report based on a NNRD subgroup, the incidence of  
 4 severe NEC was 3.2% for infants born <32 weeks[4]. The cohort event estimate is 1440  
 5 cases.

## 7 Data required

8 Appendix 1 carries the full list of variables considered relevant for extraction from NNRD  
 9 including definitions of constructed items/variables.

## 11 Potential confounders

12 Several covariates are relevant to include in the analysis as potential confounders. We will  
 13 take a hypothesis driven approach to the selection of covariates. A causal diagram (Directed  
 14 Acyclic Graphs, DAG, Figure 1) is drawn and analysed with relevant variables and potential  
 15 confounders related to antibiotic exposure and NEC outcome. Nodes and edges are  
 16 determined based on literature and subject matter knowledge. The selected covariates are  
 17 considered to reflect conditions prior to the defined exposure (i.e. within day 1-2 after birth).  
 18 For several variables, only proxies will be available (Table 1).

19 Table 1 Overview of variables

| Variable                    | Class/type            | Expected availability in NNRD | Importance for effect estimation                                                                              |
|-----------------------------|-----------------------|-------------------------------|---------------------------------------------------------------------------------------------------------------|
| AB                          | Exposure              | Available (definable)         |                                                                                                               |
| NEC                         | Outcome               | Available (definable)         |                                                                                                               |
| Site                        | Confounder            | Available                     | Minimal sufficient adjustment set to model the direct and total effect of AB on NEC according to proposed DAG |
| BW                          | Confounder            | Available                     |                                                                                                               |
| Delivery mode <sup>1</sup>  | Confounder            | Available (categories)        |                                                                                                               |
| Clinical signs <sup>2</sup> | Confounder            | Available (proxies)           |                                                                                                               |
| Maternal infection          | Confounder            | Available (clinical)          |                                                                                                               |
| GA                          | Confounder            | Available                     |                                                                                                               |
| IUGR                        | Confounder            | Available (definable)         |                                                                                                               |
| Fetal flow                  | Ancestor of Exp & Out | Unobserved                    | Blocked by IUGR and delivery mode                                                                             |

|                      |                                  |                                          |                           |
|----------------------|----------------------------------|------------------------------------------|---------------------------|
|                      | (indirect)                       |                                          |                           |
| Ischemia             | Ancestor of Exp & Out (indirect) | Unobserved                               | Blocked by Clinical Signs |
| Preeclampsia         | Ancestor of Exp & Out (indirect) | Available                                | Blocked by delivery mode  |
| Antenatal steroids   | Ancestor of Outcome              | Available                                | Blocked by clinical signs |
| Sepsis               | Ancestor of Exp & Out (indirect) | Available (definable/proxy)              | Blocked by clinical signs |
| PDA                  | Ancestor of Exp & Out (indirect) | Available (definable)                    | Blocked by clinical signs |
| Umbilical catheters  | Ancestor of Exp & Out (indirect) | Available                                | Blocked by clinical signs |
| Anaemia/transfusion  | Ancestor of Exp & Out (indirect) | Available (proxy, i.e. transfusions)     | Blocked by clinical signs |
| Sex                  | Ancestor of Outcome              | Available                                | Precision variable        |
| Ethnicity            | Ancestor of Outcome              | Available                                | Precision variable        |
| Multiparity          | Ancestor of Outcome              | Available                                | Precision variable        |
| Smoking              | Ancestor of Outcome              | Available                                | Precision variable        |
| GDM                  | Ancestor of Outcome              | Available                                | Precision variable        |
| Socioeconomic status | Ancestor of Outcome              | Available (proxy i.e. deprivation score) | Precision variable        |
| Maternal antibiotics | Ancestor of Outcome              | Available (intrapartum)                  | Precision variable        |
| Dyscolonisation      | Ancestor of Outcome              | Unobserved                               | Precision variable        |
| Assisted ventilation | Ancestor of Outcome              | Available                                | Precision variable        |
| Surfactant therapy   | Ancestor of Outcome              | Available                                | Precision variable        |
| Formula feeding      | Ancestor of Outcome              | Available                                | Precision variable        |
| Feeding initiation   | Ancestor of Outcome              | Available                                | Precision variable        |
| Probiotic initiation | Ancestor of Outcome              | Available                                | Precision variable        |

<sup>1</sup>Specification of different clinical conditions with important impact on decision to treat with AB, categorized as: Vaginal AND Spontaneous, Vaginal AND Induced, Emergency caesarean AND labour, Emergency caesarean AND no labour, Elective caesarean AND labour, Elective caesarean AND no labour.

<sup>2</sup>Respiratory/circulatory/unspecific signs/symptoms/parameters used clinical assessment and decision making related to decision to treat with antibiotics

## STATISTICAL ANALYSES

### Primary analyses

1  
2  
3 1 Previous work using logistic regression included the following covariates in the model for the  
4  
5 2 hypothesis: NICU (random effect) + GA + birthweight+ sex+ delivery mode + APGAR  
6  
7 3 scores + antenatal steroids + feeding type. We aim to test the hypothesis with data from  
8  
9 4 NNRD using the same regression model as used in the previous work (variables 1-8 in Table  
10  
11 2) and also an expanded regression model with inclusion of all potentially relevant variables  
12  
13 5 (Table 2). Results will be presented as adjusted odds ratios with 97.5% confidence intervals  
14  
15 6 (Table 2). Results will be presented as adjusted odds ratios with 97.5% confidence intervals  
16  
17 7 and Bonferroni-adjusted p-values (unadjusted p-values multiplied by 2). To better quantify  
18  
19 8 the causal effect of antibiotics, standardised risk differences with 97.5% bootstrap confidence  
20  
21 9 intervals will also be presented.  
22  
23  
24  
25

### 26 11 **Priority of covariates**

27  
28 12 Covariates to include in the model are listed and prioritised in Table 2. Confounders are  
29  
30 13 ranked higher based on importance, i.e. variables which arguably have effect on both  
31  
32 14 outcome (NEC) as well as exposure (decision to start antibiotic treatment, which relates to  
33  
34 15 infection risk/concern). Assessment of covariate importance is based on subject matter  
35  
36 16 knowledge and scientific literature (references in Table 2). For several variables, it is unclear  
37  
38 17 whether there is a relevant effect on NEC and a conservative approach is employed to include  
39  
40 18 potential confounders in the model[15]. Similar considerations apply for assessment of  
41  
42 19 variables with relevant effect on decision to treat with early antibiotics. These variables will  
43  
44 20 be included in the regression for propensity score calculation and subsequent matching. For  
45  
46 21 highly similar variables, the lower priority or quality variables may be omitted if necessary  
47  
48 22 (e.g multi-collinearity issues). Variables with very low quality (e.g. too many missing values)  
49  
50 23 will be omitted. For categorical variables, groups with very few observations will be removed  
51  
52 24 (e.g. separation issues). Estimated effects of each variable included in the model included will  
53  
54 25 be reported. Based on the recommendation to have at least ten events per variable[16], with  
55  
56  
57  
58  
59  
60



1 the event estimate approximately 1500 cases, this will provide 150 degrees of freedom in the  
 2 model. Based on the proposed covariates listed in Table 2, the required degrees of freedom  
 3 for analysis is 108. If the actual number of cases in the obtained dataset is much lower than  
 4 expected, thus providing insufficient degrees of freedom, covariates may be excluded in  
 5 reverse order of priority. See detailed specifications of listed covariates/items in Appendix 1.

6 Table 2. Priority of covariates to include in model based on DAG and availability from  
 7 NNRD.

|    |                                               | Influence on NEC[17-19] | Influence on AB-start (decision to treat based on sepsis risk)[20,21] | Potential repetition/redundancy    | Relation to node in DAG     | Structure (continuous or number of categories)                                                                                                                          |
|----|-----------------------------------------------|-------------------------|-----------------------------------------------------------------------|------------------------------------|-----------------------------|-------------------------------------------------------------------------------------------------------------------------------------------------------------------------|
| 1  | NICU/site                                     | YES                     | YES                                                                   |                                    | Site                        | Random                                                                                                                                                                  |
| 2  | GA                                            | YES                     | YES                                                                   |                                    | GA                          | Continuous                                                                                                                                                              |
| 3  | BW                                            | YES                     | YES                                                                   |                                    | BW                          | Continuous                                                                                                                                                              |
| 4  | SEX                                           | YES                     | No?                                                                   |                                    | Sex                         | Dichotomous                                                                                                                                                             |
| 5  | APGAR5                                        | Yes                     | Yes                                                                   |                                    | Clinical signs              | 11 categories (0-10)                                                                                                                                                    |
| 6  | Delivery mode + expanded (6 categories)       | Yes                     | YES                                                                   |                                    | Delivery mode and type      | 6 (see table 1)                                                                                                                                                         |
| 7  | Maternal antenatal steroids                   | Yes                     | Yes? (indicator of fetal status/delivery conditions)                  |                                    | Antenatal steroids          | None / Incomplete / complete                                                                                                                                            |
| 8  | Feeding first day                             | Yes                     | No                                                                    |                                    | Feeding                     | 1: Enteral feeding on day 1-2, human milk only<br>2: Enteral feeding on day 1-2, formula only<br>3: Enteral feeding on day 1-2, mix<br>3: No enteral feeding on day 1-2 |
| 9  | IUGR                                          | Yes                     | Yes                                                                   |                                    | IUGR                        | Dichotomous (less than -2SDS)                                                                                                                                           |
| 10 | APGAR1                                        | Yes                     | Yes?                                                                  |                                    |                             | 11 categories (0-10)                                                                                                                                                    |
| 11 | APGAR10                                       | Yes                     | Yes                                                                   |                                    | Clinical signs              | 11 categories (0-10)                                                                                                                                                    |
| 12 | EOS                                           | Yes?                    | No                                                                    |                                    | Sepsis                      | Dichotomous                                                                                                                                                             |
| 13 | Birth year (epoch)                            | Yes                     | Yes                                                                   |                                    | (similar to site/standards) | 4-5                                                                                                                                                                     |
| 14 | Transfer on first day                         | Yes                     | Yes                                                                   |                                    | Site/outborn                | Dichotomous                                                                                                                                                             |
| 15 | Level of initial unit                         | Yes                     | Yes                                                                   |                                    | Site                        | Dichotomous                                                                                                                                                             |
| 16 | Maternal Preeclampsia requiring preterm birth | Yes?                    | Yes                                                                   |                                    | Preeclampsia                | Dichotomous                                                                                                                                                             |
| 17 | Prolonged ROM                                 | Yes?                    | YES                                                                   |                                    | Maternal infection          | Dichotomous                                                                                                                                                             |
| 18 | Maternal suspected chorioamnionitis           | Yes?                    | YES                                                                   | Defined by antibiotics and pyrexia | Maternal infection          | Dichotomous                                                                                                                                                             |
| 19 | Intrapartum antibiotics                       | Yes?                    | YES (in relation to chorioamnionitis)                                 |                                    | Maternal antibiotics        | Dichotomous                                                                                                                                                             |
| 20 | Maternal pyrexia                              | Yes?                    | YES (untreated chorioamnionitis)                                      |                                    | Maternal infection          | Dichotomous                                                                                                                                                             |
| 21 | Maternal GBS                                  | Yes?                    | YES                                                                   |                                    | Maternal infection          | Dichotomous                                                                                                                                                             |
| 22 | Umbilical cord pH                             | Yes                     | Yes                                                                   |                                    | Clinical signs              | Dichotomous: <7.00 yes or no                                                                                                                                            |
| 23 | Umbilical cord lactate                        | Yes                     | Yes                                                                   | Resembles pH                       | Clinical signs              | Cont/ Di/tri?                                                                                                                                                           |
| 24 | Base excess 12h worst                         | Yes                     | Yes                                                                   |                                    | Clinical signs              | Dichotomous: < -5 yes/no                                                                                                                                                |
| 25 | Umbilical cord base excess                    | Yes                     | Yes                                                                   | Resembles BE 12h worst             | Clinical signs              | Dichotomous: < -5 yes/no                                                                                                                                                |
| 26 | Blood transfusion day 1-2                     | Yes                     | Yes?                                                                  |                                    | Anemia                      | Dichotomous                                                                                                                                                             |
| 27 | Chest compressions                            | Yes                     | Yes?                                                                  |                                    | Clinical signs              | Dichotomous                                                                                                                                                             |
| 28 | Resuscitation drugs at delivery               | Yes                     | Yes?                                                                  |                                    | Clinical signs              | Dichotomous                                                                                                                                                             |
| 29 | Ventilation at delivery                       | Yes?                    | Yes? (clinical status at birth)                                       |                                    | Assisted ventilation        | Dichotomous                                                                                                                                                             |
| 30 | Spontaneous respiration time                  | Yes?                    | Yes?                                                                  |                                    | Clinical signs              | 3 categories: <1 min, 1-5 min, >5 min                                                                                                                                   |
| 31 | Admission temp                                | Yes                     | Yes?                                                                  |                                    | Clinical signs              | 3 categories:                                                                                                                                                           |

|    |                                       |          |                                 |                         |                      |                                       |
|----|---------------------------------------|----------|---------------------------------|-------------------------|----------------------|---------------------------------------|
|    |                                       |          |                                 |                         |                      | <36.5, 36.5-37.5, >37.5               |
| 32 | Admission oxygen SAT                  | Yes      | Yes                             |                         | Clinical signs       | 3 categories: >94, 90-94, <90         |
| 33 | Inotropes on first day                | Yes      | Yes?                            |                         | Clinical signs       | Dichotomous                           |
| 34 | Admission mean BP                     | Yes?     | Yes/no?                         | Resembles inotropes     | Clinical signs       | Dichotomous: below GA yes/no          |
| 35 | Ethnicity                             | Yes      | Yes? (risk of inf)              |                         | Ethnicity            | 4 categories as suggested in appendix |
| 36 | Maternal deprivation score            | Yes?     | Yes? (risk of inf)              |                         | SES                  | Deprivation centiles?                 |
| 37 | Intubation first day                  | ?        | Yes?                            |                         | Assisted ventilation | Dichotomous                           |
| 38 | Intubation at delivery                | ?        | Yes?                            | Resembles intubation d1 | Assisted ventilation | Dichotomous                           |
| 39 | Surfactant first day                  | Yes?     | Yes?                            |                         | Surfactant therapy   | Dichotomous                           |
| 40 | Surfactant at delivery                | ?        | Yes?                            | Resembles intubation d1 | Surfactant therapy   | Dichotomous                           |
| 41 | Time of cord clamp                    | Yes/No?? | Yes? (clinical status at birth) |                         | Clinical signs       | Dichotomous: >60 seconds yes/no       |
| 42 | Probiotics                            | Yes      | No                              |                         | Probiotic initiation | Dichotomous                           |
| 43 | PDA identified day 1-2                | Yes      | No                              |                         | PDA                  | Dichotomous                           |
| 44 | PDA treatment day 1-2                 | Yes      | No                              |                         | PDA                  | Dichotomous                           |
| 45 | Multiplicity                          | ?        | No?                             |                         | Multiplicity         | Dichotomous                           |
| 46 | Smoking                               | Yes?     | No?                             |                         | Smoking              | Dichotomous                           |
| 47 | Parity                                | ?        | No?                             |                         | Parity               | Dichotomous                           |
| 48 | Umbilical catheters                   | Yes?     | No                              |                         | Umbilical catheters  | Dichotomous                           |
| 49 | Parenteral nutrition d1-2             | ?        | ?                               |                         |                      | Dichotomous                           |
| 50 | Admission heart rate                  | ?        | ?                               |                         | Clinical signs       | 3 categories: >200, 100-200, <100     |
| 51 | Maternal antenatal magnesium sulphate | No?      | Yes/no ?                        | Resembles preeclampsia  | Preeclampsia         | Dichotomous                           |
| 52 | Maternal gestational hypertension     | No?      | No                              |                         |                      | Dichotomous                           |
| 53 | Maternal diabetes                     | No?      | No                              |                         | GDM                  | Dichotomous                           |

## Sensitivity analyses

The following sensitivity analyses will be performed:

Early antibiotic exposure only with ampicillin or penicillin plus gentamicin, early antibiotic exposure defined by other timings after birth (later initiation and lasting until 4-6 days after birth) and alternative methods for diagnosing NEC (as standards for NEC diagnosis are unclear). For the latter analyses, we will define and re-analyse NEC diagnosis as ‘pragmatic NEC’ (5 days of nil by mouth and antibiotics and a diagnostic code of NEC) and NEC including focal intestinal perforation diagnosis (FIP). This condition is sometimes difficult to separate from NEC. We will also record infants with laparotomy- confirmed FIP (intestinal perforation, classified as non-NEC) in addition to the primary NEC (Battersby et al) definition. The statistical analyses will be repeated using propensity score matching (with

1 propensity scores based on exposure regression), as an alternative approach to logistic  
2 regression.  
3

### 4 **Secondary analyses**

5 We intend to use the same logistic regression models for secondary outcomes, as those  
6 specified for the primary outcome. The most important confounders (or proxies) for the  
7 secondary outcomes are included in this model. Detailed model specification for each  
8 specific secondary outcome as done for the primary outcome is beyond the aim and scope of  
9 this study (focusing on NEC). With propensity score matching, direct comparison between  
10 antibiotic exposure versus controls can in principle be performed for any outcome, assuming  
11 correct model specification for the propensity score.

### 12 **Exploratory analyses**

13 Additional non-defined exploratory analyses based on findings from the dataset may be  
14 performed.

### 15 **Missing data**

16 We assume that missing data occur randomly between groups and will be imputed ten-fold  
17 using multiple imputation by chained equations. Results will be pooled according to Rubin's  
18 rule.

### 19 **Multiple testing**

20 Adjusted P values will be reported with Bonferroni correction of the two primary analyses  
21 (along with corresponding 97.5% confidence intervals) and Benjamini-Hochberg adjusted P  
22 values from the secondary analyses. Post hoc exploratory analyses will be reported without  
23 adjustment of P values and should be interpreted with corresponding caution.

## 24 **ETHICS AND DISSEMINATION**

1  
2  
3 1 The study will be registered with International Standard Randomised Controlled Trials  
4  
5 2 Number (ISRCTN) before opening and is sponsored by Newcastle Hospitals NHS  
6  
7 3 Foundation Trust and the protocol with statistical analysis plan will be uploaded to the Open  
8  
9 4 Science Framework website osf.io prior to data analysis initiation. We will apply for  
10  
11 5 HRA/REC approvals. The study is observational and uses de-identified data that is already  
12  
13 6 collected. Dissemination will be by presentation and publication in peer reviewed journals.  
14  
15  
16

### 17 **PATIENT PUBLIC INVOLVEMENT AND IMPORTANCE TO THE NHS**

18  
19 8 We have worked closely with parents on all our studies. The NEC UK parent group and other  
20  
21 9 parent groups and representatives continue to assert that better understanding of NEC is a key  
22  
23 10 priority. The NHS, parents and babies experience significant burden from NEC in terms of  
24  
25 11 adverse outcome, prolonged hospitalisation, developmental impact and NHS costs. There is  
26  
27 12 significant concern related to use of antibiotics in the neonatal population and it is important  
28  
29 13 that studies help optimal use of early antibiotics.  
30  
31  
32

### 33 **DISCUSSION**

34  
35 15 This study aims to add relevant scientific information to an important clinical decision made  
36  
37 16 for every preterm infant admitted to a neonatal unit: the use and duration of antibiotics in the  
38  
39 17 absence of clear signs of bacteraemia or early onset sepsis. Cases of culture-proven early  
40  
41 18 onset sepsis (EOS) are relatively few, with rates being one to seven per 1000 live births in  
42  
43 19 high income countries[22]. There are potentially large numbers of infants where a clinical  
44  
45 20 choice is available to withhold early antibiotic treatment. Data are currently conflicting as to  
46  
47 21 the overall impact on NEC of receiving (or withholding) antibiotics in the first days of life.  
48  
49 22 Early bacterial nature and load in the preterm gut has been linked to NEC development[23,  
50  
51 23 24]. Use of intravenous antibiotics shortly after birth may slow colonisation, allowing the gut  
52  
53 24 immune system a short period of adaption that reduces the risk of TLR4 mediated NEC[25].  
54  
55 25 The integrity of the mucosal barrier has been shown to improve significantly in the first days  
56  
57  
58  
59  
60

1 after preterm birth in humans[26]. Thus, potentially only short duration of very early  
2 antibiotic treatment may be relevant for such effect, in contrast to prolonged treatment which  
3 have been shown to cause persistent gut dysbiosis[27] that may instead increase NEC  
4 risk[7,8]. Data from a piglet model of NEC suggests that antibiotic use is mechanistically  
5 linked to preterm NEC development[28] and preterm immune development[29]. However no  
6 difference was seen in total bacterial load of stool in preterm infants who did and did not go  
7 on to develop NEC[30]. Given the conflicting data Clinicians need better information to help  
8 guide early antibiotic treatment in relation to NEC, especially important as NEC rates in  
9 premature infants may actually be increasing[31]. The proposed study using NNRD benefits  
10 from access to large numbers of infants with recorded relevant risk factors and outcomes.  
11 Large datasets offer the advantage of including many NEC cases, and we anticipate around  
12 1500 informative cases of NEC. These data are increasingly well validated by individual  
13 units at the point of data entry, but are potentially less well validated than infants with trial  
14 data collected within specific trials.

15 We have in this study given careful thought to handling confounding factors. Analysis of the  
16 current understanding of NEC and the use of directed acyclic graph to guide analysis have  
17 been undertaken to attempt to control for what are highly complex clinical factors[17-19]. As  
18 demonstrated in the DAG many factors, including those on a causal pathway to NEC, impact  
19 the decision to administer early antibiotics[20-21]. The aim to analyse this data using both  
20 propensity scoring and logistic regression is a major strength for this study and for future  
21 analyses using large databases to address complex questions. Propensity scoring has recently  
22 been used to address feeding during hypothermia[32] and the impact of early parenteral  
23 nutrition on preterm outcomes[33] using the NNRD, but without alternate statistical  
24 approach. Whilst both propensity scoring and regression analysis have strengths and  
25 weaknesses to the best of our knowledge direct comparison of these methodologies has not

1 been undertaken within large neonatal datasets, and is important methodologically for future  
2 neonatal studies. The data generated by this study will thus inform important aspects of  
3 wider neonatal care and in relation to early neonatal use of antibiotics and later occurrence of  
4 NEC.

## 6 **AUTHOR CONTRIBUTIONS**

7 NE had the original idea for the study. RS undertook the DAG. RS,JF,JB, PTS planned  
8 statistical analysis. RS,NE,JF,JB,PTS,CG, GG and SU all contributed to overall study design,  
9 protocol development and the writing and review of this paper. JB submitted for registration  
10 and approvals.

## 11 **FUNDING**

12 We will use institutional co-funding to cover the cost of data extraction from the NNRD.  
13 Work to plan and carry out the analytical work of this study was supported by a grant from  
14 the Novo Nordic Foundation (postdoctoral fellowship to René Shen, BRIDGE Translational  
15 Excellence Programme, grant no. NNF18SA0034956).

## 16 **COMPETING INTERESTS**

17 No author has relevant competing interests to declare.

## 18 **DATA STATEMENT**

19 Data may be available on request to the corresponding author.

## 20 **LEGENDS**

21 Figure 1. Directed Acyclic Graph (DAG) diagram of causal assumptions related to the  
22 hypothesis based on subject-matter knowledge, used for confounder selection. Model code  
23 text for figure and interactive diagram analysis on dagitty.net is available in Appendix 2.  
24 Node with arrowhead: exposure; Node with I: outcome; Black nodes: ancestor of outcome;  
25 Dark grey nodes: ancestor of exposure and outcome; White nodes: adjusted variables

1  
2  
3  
4  
5  
6  
7  
8  
9  
10  
11  
12  
13  
14  
15  
16  
17  
18  
19  
20  
21  
22  
23  
24  
25  
26  
27  
28  
29  
30  
31  
32  
33  
34  
35  
36  
37  
38  
39  
40  
41  
42  
43  
44  
45  
46  
47  
48  
49  
50  
51  
52  
53  
54  
55  
56  
57  
58  
59  
60

1 (primary analysis); Thick arrow: causal path; Thin arrows: non-biasing paths. AB: early  
2 antibiotics; BW: birth weight; GA: gestational age; GDM: gestational diabetes mellitus;  
3 IUGR: intrauterine growth restriction; NEC: necrotising enterocolitis; PDA: patent ductus  
4 arteriosus; SES: socioeconomic status  
5

For peer review only

1  
2  
3  
4  
5  
6  
7  
8  
9  
10  
11  
12  
13  
14  
15  
16  
17  
18  
19  
20  
21  
22  
23  
24  
25  
26  
27  
28  
29  
30  
31  
32  
33  
34  
35  
36  
37  
38  
39  
40  
41  
42  
43  
44  
45  
46  
47  
48  
49  
50  
51  
52  
53  
54  
55  
56  
57  
58  
59  
60  
1 REFERENCES

- 1 March of Dimes, PMNCH, Save the Children W. Born too soon. *Born Too Soon, Glob Action Rep Preterm Birth* Eds CP Howson, MV Kinney, JE Lawn *World Heal Organ Geneva* 2012;**13**:1–126.
- 2 Khan KA, Petrou S, Dritsaki M, *et al*. Economic costs associated with moderate and late preterm birth: A prospective population-based study. *BJOG An Int J Obstet Gynaecol* 2015;**122**:1495–505.
- 3 Berrington JE, Hearn RI, Bythell M, *et al*. Deaths in preterm infants: Changing pathology over 2 decades. *J Pediatr* 2011;**160**:49-53.
- 4 Battersby C, Santhalingam T, Costeloe K, *et al*. Incidence of neonatal necrotising enterocolitis in high-income countries: A systematic review. *Arch. Dis. Child. Fetal Neonatal Ed.* 2018;**103**:F182–9.
- 5 Jones IH, Hall NJ. Contemporary Outcomes for Infants with Necrotizing Enterocolitis—A Systematic Review. *J Pediatr* Published Online First: January 2020. doi:10.1016/j.jpeds.2019.11.011
- 6 Greenberg RG, Chowdhury D, Hansen NI, *et al*. Prolonged duration of early antibiotic therapy in extremely premature infants. *Pediatr Res* 2019;**85**:994–1000.
- 7 Kuppala VS, Meinzen-Derr J, Morrow AL, *et al*. Prolonged initial empirical antibiotic treatment is associated with adverse outcomes in premature infants. *J Pediatr* Published Online First: 2011. doi:10.1016/j.jpeds.2011.05.033
- 8 Michael Cotten JC. Prolonged Duration of Initial Empirical Antibiotic Treatment is associated with increased rates of necrotizing enterocolitis and death for extremely low birth weight infants. *Pediatrics* 2009;**123**:58–66.
- 9 Pammi M, Cope J, Tarr PI, *et al*. Intestinal dysbiosis in preterm infants preceding necrotizing enterocolitis: a systematic review and meta-analysis. *Microbiome* Published Online First: 2017. doi:10.1186/s40168-017-0248-8
- 10 Li Y, Shen RL, Ayede AI, *et al*. Early Use of Antibiotics Is Associated with a Lower Incidence of Necrotizing Enterocolitis in Preterm, Very Low Birth Weight Infants: The NEOMUNE-NeoNutriNet Cohort Study. *J Pediatr* 2020;**227**:128-134.e2.
- 11 Letouzey M, Lorthe E, Marchand-Martin L, *et al*. Early antibiotic exposure and adverse outcomes in very preterm infants at low risk of early-onset sepsis: the EPIPAGE-2 cohort study. *J Pediatr* Published Online First: 20 December 2021. doi:10.1016/j.jpeds.2021.11.075
- 12 Cantey J. Early antibiotic therapy and adverse outcomes in preterm infants: Time for a trial! *J Pediatr* Published Online First: 2020. doi:10.1016/j.jpeds.2020.07.046
- 13 Ruoss J, Bazacliu C, Russell J, *et al*. Routine Early Antibiotic use in Symptomatic preterm Neonates (REASON): a prospective randomized controlled trial. Published Online First MedRxiv: 2020. doi:10.1101/2020.04.17.20069617
- 14 Spencer A and Modi N. National neonatal data to support specialist care and improve infant outcomes. *Arch Dis Child Fetal Neonatal Ed* 2013;**98**.
- 15 VanderWeele TJ. Principles of confounder selection. *Eur J Epidemiol* 2019;**34**:211–9.



- 1  
2  
3 1 16 Vittinghoff E and McCulloch CE. Relaxing the rule of ten events per variable in  
4 2 logistic and cox regression. *Am J Epidemiol* 2007;**165**:710–8.  
5  
6 3 17 Samuels N, van de Graaf RA, de Jonge RCJ, et al. Risk factors for necrotizing  
7 4 enterocolitis in neonates: a systematic review of prognostic studies. *BMC Pediatr*  
8 5 2017;**17**:105.  
9  
10 6 18 Rose AT and Patel RM. A critical analysis of risk factors for necrotizing enterocolitis.  
11 7 *Semin Fetal Neonatal Med* 2018;**23**:374–9.  
12  
13 8 19 Gephart SM, McGrath JM, Effken JA, et al. Necrotizing enterocolitis risk state of the  
14 9 science. *Adv Neonatal Care* 2012;**12**:77–87.  
15  
16 10 20 Puopolo KM, Benitz WE, Zaoutis TE, et al Committee on fetus and newborn;  
17 11 committee on infectious diseases. Management of Neonates Born at  $\leq 34\ 6/7$  Weeks'  
18 12 Gestation With Suspected or Proven Early-Onset Bacterial Sepsis. *Pediatrics*. 2018  
19 13 Dec;**142**(6):e20182896. doi: 10.1542/peds.2018-2896.  
20  
21 14 21 Martius JA, Roos T, Gora B, et al. Risk factors associated with early-onset sepsis in  
22 15 premature infants. *Eur J Obstet Gynecol Reprod Biol* 1999;**85**:151–8.  
23  
24 16 22 Lukacs SL and Schrag SJ. Clinical sepsis in neonates and young infants, United States,  
25 17 1988-2006. *J Pediatr*. 2012;**160**(6):960-5.  
26  
27 18 23 Choi YS and Song IG. Fetal and preterm infant microbiomes: A new perspective of 18  
28 19 necrotizing enterocolitis. *Korean J Pediatr* 2017;**60**:307–11.  
29  
30 20 24 Brower-Sinning R, Zhong D, Good M, et al. Mucosa Associated Bacterial Diversity in  
31 21 Necrotizing Enterocolitis. *PLoS ONE* 2014;**9**(9): e105046  
32 22  
33 23 25 Mihi B and Good M. Impact of Toll-Like Receptor 4 Signalling in Necrotizing  
34 24 Enterocolitis: The State of the Science. *Clin Perinatol* 2018;  
35 25 doi:10.1016/j.clp.2018.09.007  
36 26  
37 27 26 van Elburg RM, Fetter WPF, Bunkers CM, et al. Intestinal permeability in relation  
38 28 to birth weight and gestational and postnatal age. *Arch Dis Child Fetal Neonatal Ed*  
39 29 2003;**88**:F52-5.  
40  
41 30 27 Zwittink R, Renes I, van Lingen R, et al. Association between duration of  
42 31 intravenous antibiotic administration and early-life microbiota development in late-  
43 32 preterm infants. *Eur J Clin Microbiol Infect Dis* 2018; **37**:475–483.  
44 33  
45 34 28 Jensen ML, Thymann T, Cilieborg MS, et al. Antibiotics modulate intestinal  
46 35 immunity and prevent necrotizing enterocolitis in preterm neonatal piglets. *Am J*  
47 36 *Physiol Gastrointest Liver Physiol* 2014;**306**:G59-71.  
48 37  
49 38 29 Nguyen DN, Fuglsang E, Jiang P, et al. Oral antibiotics increase blood neutrophil  
50 39 maturation and reduce bacteremia and necrotizing enterocolitis in the immediate  
51 40 postnatal period of preterm pigs. *Innate Immun* 2016;**22**:51–62.  
52  
53 41 30 Abdulkadir B, Nelson A, Skeath T, et al. Stool bacterial load in preterm infants with  
54 42 necrotising enterocolitis. *Earl Hum Dev* 2016;**95**:1-1.  
55  
56  
57  
58  
59  
60

- 1  
2  
3 1 31 Juhl SM, Gregersen R, Lange T, et al. Incidence and risk of necrotizing enterocolitis in  
4 2 Denmark from 1994-2014. *PLoS ONE* 2019;14(7)  
5  
6 3 32 Gale C, Jeyakumaran D, Longford N, et al Administration of parenteral nutrition  
7 4 during therapeutic hypothermia: a population level observational study using routinely  
8 5 collected data held in the National Neonatal Research Database *Arch Dis Child - Fetal*  
9 6 *Neonatal Ed on* 2021;106:608-613.  
10 7  
11 8 33 Webbe JWH, Longford N, Battersby C, et al Outcomes in relation to early parenteral  
12 9 nutrition use in preterm neonates born between 30 and 33 weeks' gestation: a  
13 10 propensity score matched observational study. *Arch Dis Child - Fetal Neonatal*  
14 11 *Ed* 2022;107:131-136.  
15 12  
16 13  
17  
18  
19  
20  
21  
22  
23  
24  
25  
26  
27  
28  
29  
30  
31  
32  
33  
34  
35  
36  
37  
38  
39  
40  
41  
42  
43  
44  
45  
46  
47  
48  
49  
50  
51  
52  
53  
54  
55  
56  
57  
58  
59  
60

1  
2  
3  
4  
5  
6  
7  
8  
9  
10  
11  
12  
13  
14  
15  
16  
17  
18  
19  
20  
21  
22  
23  
24  
25  
26  
27  
28  
29  
30  
31  
32  
33  
34  
35  
36  
37  
38  
39  
40  
41  
42  
43  
44  
45  
46  
47  
48  
49  
50  
51  
52  
53  
54  
55  
56  
57  
58  
59  
60



| Clevermed code | ICD-10 code | Diagnosis                                                                             |
|----------------|-------------|---------------------------------------------------------------------------------------|
| 10741          | Q39.0       | Oesophageal atresia without distal fistula                                            |
| 16195          | Q39.0       | Atresia of oesophagus without fistula                                                 |
| 10740          | Q39.1       | Oesophageal atresia with distal tracheo-oesophageal fistula                           |
| 16196          | Q39.1       | Atresia of oesophagus with tracheo-oesophageal fistula (TOF)                          |
| 16197          | Q39.2       | Congenital tracheo-oesophageal fistula without atresia (TOF)                          |
| 10273          | Q39.3       | Congenital stenosis of the oesophagus                                                 |
| 16198          | Q39.3       | Congenital stenosis and stricture of oesophagus                                       |
| 16199          | Q39.4       | Oesophageal web                                                                       |
| 10358          | Q41.0       | Duodenal atresia / stenosis / web (specify)                                           |
| 16212          | Q41.0       | Congenital absence, atresia and stenosis of duodenum                                  |
| 16213          | Q41.0       | DA Duodenal atresia / stenosis                                                        |
| 10605          | Q41.1       | Jejunal atresia / stenosis (specify)                                                  |
| 16214          | Q41.1       | JA Jejunal atresia / stenosis                                                         |
| 10541          | Q41.2       | Ileal atresia / stenosis (specify)                                                    |
| 16215          | Q41.2       | Congenital absence, atresia and stenosis of ileum                                     |
| 16216          | Q41.2       | IA Ileal atresia / stenosis                                                           |
| 16217          | Q41.X       | Congenital absence, atresia and stenosis of small intestine                           |
| 16218          | Q42.0       | Congenital absence, atresia and stenosis of rectum with fistula                       |
| 10496          | Q42.00      | High anorectal anomaly with rectourethral fistula                                     |
| 10497          | Q42.01      | High anorectal anomaly with rectovesical fistula                                      |
| 10498          | Q42.02      | High anorectal anomaly with rectovulval fistula                                       |
| 10495          | Q42.03      | High anorectal anomaly with rectocutaneous fistula                                    |
| 10494          | Q42.04      | High anorectal anomaly with rectocloacal fistula                                      |
| 10493          | Q42.08      | High anorectal anomaly with fistula (specify)                                         |
| 10499          | Q42.1       | High anorectal anomaly without fistula                                                |
| 16219          | Q42.1       | Congenital absence, atresia and stenosis of rectum without fistula                    |
| 16220          | Q42.2       | Congenital absence, atresia and stenosis of anus with fistula                         |
| 10636          | Q42.20      | Low anorectal anomaly with anocutaneous fistula                                       |
| 10637          | Q42.21      | Low anorectal anomaly with anovestibular fistula                                      |
| 10638          | Q42.28      | Low anorectal anomaly with fistula (other specify)                                    |
| 10639          | Q42.3       | Low anorectal anomaly without fistula                                                 |
| 16221          | Q42.3       | Congenital absence, atresia and stenosis of anus without fistula                      |
| 10240          | Q42.31      | Congenital anal stenosis                                                              |
| 16222          | Q42.8       | Congenital absence, atresia and stenosis of anus of other parts of large intestine    |
| 16223          | Q429        | Congenital absence, atresia and stenosis of anus of large intestine, part unspecified |
| 16224          | Q42X        | Congenital absence, atresia and stenosis of large intestine                           |
| 16235          | Q43.7       | Persistent cloaca                                                                     |

Supplementary Table 1 Gastrointestinal anomalies

| Clevermed code | ICD-10 code | Diagnosis                                                                |
|----------------|-------------|--------------------------------------------------------------------------|
| 15890          | Q00.0       | Anencephaly                                                              |
| 15891          | Q00.1       | Craniorachischisis                                                       |
| 15892          | Q00.2       | Iniencephaly                                                             |
| 15893          | Q00.X       | Anencephaly and similar malformations                                    |
| 15894          | Q01.0       | Frontal encephalocele                                                    |
| 15895          | Q01.1       | Nasofrontal encephalocele                                                |
| 15896          | Q01.2       | Occipital encephalocele                                                  |
| 15897          | Q01.8       | Encephalocele of other sites                                             |
| 15898          | Q01.9       | Encephalocele (unknown or unspecified cause)                             |
| 15899          | Q01.X       | Encephalocele                                                            |
| 15918          | Q04.2       | Holoprosencephaly                                                        |
| 15926          | Q05.0       | Cervical spina bifida with hydrocephalus                                 |
| 15927          | Q05.1       | Thoracic spina bifida with hydrocephalus                                 |
| 15928          | Q05.2       | Lumbar spina bifida with hydrocephalus                                   |
| 15929          | Q05.3       | Sacral spina bifida with hydrocephalus                                   |
| 15930          | Q05.4       | (unknown or unspecified cause) spina bifida with hydrocephalus           |
| 15931          | Q05.5       | Cervical spina bifida without hydrocephalus                              |
| 15932          | Q05.6       | Thoracic spina bifida without hydrocephalus                              |
| 15933          | Q05.7       | Lumbar spina bifida without hydrocephalus                                |
| 15934          | Q05.8       | Sacral spina bifida without hydrocephalus                                |
| 15935          | Q05.9       | Spina bifida (unknown or unspecified cause)                              |
| 10986          | Q05.9a      | Spina bifida                                                             |
| 10704          | Q05.9b      | Myelomeningocele (specify site)                                          |
| 15936          | Q05.X       | Spina bifida                                                             |
| 16024          | Q20.0       | Common arterial trunk (Truncus malformation)                             |
| 10356          | Q20.1       | Double outlet right ventricle (DORV)                                     |
| 16025          | Q20.1       | Double outlet right ventricle (DORV)                                     |
| 16026          | Q20.2       | Double outlet left ventricle (DOLV)                                      |
| 11070          | Q20.3       | Transposition of the great vessels (TGA)                                 |
| 16027          | Q20.3       | Transposition great arteries (TGA)                                       |
| 16028          | Q20.4       | Double inlet ventricle (DILV)                                            |
| 16029          | Q20.5       | Discordant atrioventricular connection                                   |
| 16030          | Q20.6       | Isomerism of atrial appendages                                           |
| 16031          | Q20.8       | Other congenital malformations of cardiac chambers and connections       |
| 16032          | Q20.9       | Congenital malformations of cardiac chambers and connections unspecified |
| 16033          | Q20.X       | Congenital malformations of cardiac chambers and connections             |
| 16035          | Q20.91      | Atrium single                                                            |
| 16036          | Q20.92      | Ventricle single                                                         |
| 10097          | Q21.2       | Atrio-ventricular septal defect (AVSD)                                   |
| 16039          | Q21.2       | Atrioventricular septal defect (AVSD)                                    |
| 11043          | Q21.3       | Tetralogy of Fallot                                                      |
| 16040          | Q21.3       | Tetralogy of Fallot                                                      |

|    |       |        |                                                                           |
|----|-------|--------|---------------------------------------------------------------------------|
| 1  |       |        |                                                                           |
| 2  |       |        |                                                                           |
| 3  |       |        |                                                                           |
| 4  | 16045 | Q22.0  | Pulmonary valve atresia                                                   |
| 5  | 16046 | Q22.1  | Congenital pulmonary valve stenosis                                       |
| 6  | 16047 | Q22.2  | Congenital pulmonary valve insufficiency                                  |
| 7  | 16048 | Q22.3  | Other congenital malformations of pulmonary valve                         |
| 8  | 16049 | Q22.4  | Congenital tricuspid atresia / stenosis                                   |
| 9  | 16050 | Q22.5  | Ebstein's anomaly                                                         |
| 10 | 16051 | Q22.6  | Hypoplastic right heart syndrome                                          |
| 11 | 16052 | Q22.8  | Other congenital malformations of tricuspid valve                         |
| 12 | 16053 | Q22.9  | Congenital malformation of tricuspid valve (unknown or unspecified cause) |
| 13 | 16054 | Q22.X  | Congenital malformations of pulmonary and tricuspid valves                |
| 14 | 16055 | Q23.0  | Congenital stenosis of aortic valve (AS)                                  |
| 15 | 16056 | Q23.1  | Congenital insufficiency of aortic valve                                  |
| 16 | 16057 | Q23.2  | Congenital mitral stenosis (MS)                                           |
| 17 | 16058 | Q23.3  | Mitral atresia                                                            |
| 18 | 16059 | Q23.4  | Hypoplastic left heart syndrome (HLH)                                     |
| 19 | 16060 | Q23.8  | Other congenital malformations of aortic and mitral valves                |
| 20 | 16061 | Q23.9  | Congenital malformation of aortic and mitral valves unspec                |
| 21 | 16062 | Q23.X  | Congenital malformations of aortic and mitral valves                      |
| 22 | 16079 | Q25.1  | Coarctation of aorta                                                      |
| 23 | 10227 | Q25.19 | Coarctation of the aorta                                                  |
| 24 | 16080 | Q25.2  | Hypoplasia of aortic arch                                                 |
| 25 | 16081 | Q25.3  | Stenosis of aorta (AS)                                                    |
| 26 | 16082 | Q25.4  | Malformation of aorta                                                     |
| 27 | 16083 | Q25.5  | Atresia of pulmonary artery                                               |
| 28 | 16084 | Q25.6  | Stenosis of pulmonary artery (PS)                                         |
| 29 | 16086 | Q25.8  | Other congenital malformations of great arteries                          |
| 30 | 16087 | Q25.8  | Transposition of the great vessels (TGA)                                  |
| 31 | 11057 | Q26.2  | Total anomalous pulmonary venous drainage (TAPVD)                         |
| 32 | 16092 | Q26.2  | Total anomalous pulmonary venous connection (TAPVD)                       |
| 33 | 16154 | Q33.6  | Hypoplasia and dysplasia of lung                                          |
| 34 | 16241 | Q44.2  | Atresia of bile ducts                                                     |
| 35 | 10123 | Q60.1  | Bilateral renal agenesis                                                  |
| 36 | 16318 | Q60.1B | Renal agenesis, bilateral                                                 |
| 37 | 16324 | Q60.6  | Potter's syndrome                                                         |
| 38 | 16327 | Q61.1  | Polycystic kidney, infantile type                                         |
| 39 | 10100 | Q61.1a | Autosomal recessive polycystic kidney - infantile                         |
| 40 | 10367 | Q64.1  | Ectopia vesicae                                                           |
| 41 | 16356 | Q64.1  | Exstrophy of urinary bladder                                              |
| 42 | 10854 | Q64.2  | Posterior urethral valves (PUV)                                           |
| 43 | 16357 | Q64.2  | Congenital posterior urethral valves (PUV)                                |
| 44 | 16360 | Q64.5  | Congenital absence of bladder and urethra                                 |
| 45 | 10008 | Q64.5a | Absence of bladder                                                        |
| 46 | 10236 | Q64.5b | Congenital absence of urethra                                             |
| 47 | 16475 | Q77.1  | Thanatophoric short stature                                               |
| 48 |       |        |                                                                           |
| 49 |       |        |                                                                           |
| 50 |       |        |                                                                           |
| 51 |       |        |                                                                           |
| 52 |       |        |                                                                           |
| 53 |       |        |                                                                           |
| 54 |       |        |                                                                           |
| 55 |       |        |                                                                           |
| 56 |       |        |                                                                           |
| 57 |       |        |                                                                           |
| 58 |       |        |                                                                           |
| 59 |       |        |                                                                           |
| 60 |       |        |                                                                           |

|       |        |                                                  |
|-------|--------|--------------------------------------------------|
| 10246 | Q79.0  | Congenital diaphragmatic hernia                  |
| 10490 | Q79.0  | Hernia into the cord                             |
| 16495 | Q79.0  | Congenital diaphragmatic hernia                  |
| 16496 | Q79.1A | Aplasia of diaphragm                             |
| 16497 | Q79.1E | Eventration of diaphragm                         |
| 16498 | Q79.2  | Exomphalos                                       |
| 10395 | Q79.2  | Exomphalos                                       |
| 16499 | Q79.3  | Gastroschisis                                    |
| 16589 | Q90.0  | Trisomy 21, meiotic nondisjunction               |
| 16590 | Q90.1  | Trisomy 21, mosaicism (mitotic nondisjunction)   |
| 16591 | Q90.2  | Trisomy 21, translocation                        |
| 16592 | Q90.9  | Down's syndrome (unknown or unspecified cause)   |
| 16593 | Q90.X  | Down's syndrome                                  |
| 16594 | Q91.0  | Trisomy 18, meiotic nondisjunction               |
| 16595 | Q91.1  | Trisomy 18, mosaicism (mitotic nondisjunction)   |
| 16596 | Q91.2  | Trisomy 18, translocation                        |
| 16597 | Q91.3  | Edwards' syndrome (unknown or unspecified cause) |
| 16598 | Q91.4  | Trisomy 13, meiotic nondisjunction               |
| 16599 | Q91.5  | Trisomy 13, mosaicism (mitotic nondisjunction)   |
| 16600 | Q91.6  | Trisomy 13, translocation                        |
| 16601 | Q91.7  | Patau's syndrome (unknown or unspecified cause)  |
| 16602 | Q91.X  | Edwards' syndrome and Patau's syndrome           |

Supplementary Table 2 Congenital anomalies

**Early antibiotic use and incidence of necrotising enterocolitis in very preterm infants: a UK based observational study using routinely recorded data****Inclusion criteria: Birth weight < 1500g or GA < 32 wk****Born between: 1/1/2012 and 31/12/2020**

Request data as one table with individual-level data with each row representing a unique baby. Each item/variable as separate column.

**Exposure parameters:**

| Requested item  | Item name in extract | How is it derived                                                                                                                                                                                                                                                                                                                                                                                                                                                                                                                                                                                                                                                                  | Coding in extract                | Notes                                                    |
|-----------------|----------------------|------------------------------------------------------------------------------------------------------------------------------------------------------------------------------------------------------------------------------------------------------------------------------------------------------------------------------------------------------------------------------------------------------------------------------------------------------------------------------------------------------------------------------------------------------------------------------------------------------------------------------------------------------------------------------------|----------------------------------|----------------------------------------------------------|
| Antibiotics any | Antibiotics_Day1     | Postnatal Day 1 with any DailyDrugs in<br>1010155 Benzyl Penicillin<br>1010158 Augmentin<br>1010179 Flucloxacillin<br>500012 Flucloxacillin<br>500016 Gentamicin<br>500072 Co-amoxiclav<br>500086 Co-amoxiclav<br>500084 Ciprofloxacin<br>500029 Netilmicin<br>500002 Amikacin<br>500211 Tazocin<br>500023 Metronidazole<br>500040 Vancomycin<br>500007 Cefotaxime<br>500004 Ampicillin<br>500009 Cefuroxime<br>500008 Ceftazidime<br>500175 Ceftriaxone<br>500032 Piperacillin<br>500206 Ofloxacin<br>500005 Azlocillin<br>1010171 Linezolid<br>1010271 Cefalexin<br>1010139 Amoxicillin<br>500070 Amoxicillin<br>500128 Meropenem<br>500118 Imepenem<br>500145 Imipenem THEN (1) | 0 = No<br>1 = Yes<br>9 = Unknown | Indicates whether baby has received antibiotics on day 1 |
|                 | Antibiotics_Day6     | As above for each postnatal day between Day2-Day6                                                                                                                                                                                                                                                                                                                                                                                                                                                                                                                                                                                                                                  | 0 = No<br>1 = Yes                |                                                          |



1  
2  
3  
4  
5  
6  
7  
8  
9  
10  
11  
12  
13  
14  
15  
16  
17  
18  
19  
20  
21  
22  
23  
24  
25  
26  
27  
28  
29  
30  
31  
32  
33  
34  
35  
36  
37  
38  
39  
40  
41  
42  
43  
44  
45  
46

|                              |                          |                                                                |                                                                                                                 |  |
|------------------------------|--------------------------|----------------------------------------------------------------|-----------------------------------------------------------------------------------------------------------------|--|
|                              |                          |                                                                | 9 = Unknown                                                                                                     |  |
| Antibiotics standard empiric |                          | As above, but only ampicillin or penicillin + gentamicin       |                                                                                                                 |  |
|                              | Day of first antibiotics | Postnatal day of first (of any) antibiotic treatment           | Numeric (age in days since birth if received antibiotics)<br>999 = No antibiotics received throughout admission |  |
|                              | Total antibiotics        | Total number of days on (any) antibiotics throughout admission | Numeric<br>999 = No antibiotics received throughout admission                                                   |  |

**Outcome parameters**

| Requested item                                             | Item name in extract         | How is it derived                                                                                                                                                    | Coding in extract                                                | Notes                                                          |
|------------------------------------------------------------|------------------------------|----------------------------------------------------------------------------------------------------------------------------------------------------------------------|------------------------------------------------------------------|----------------------------------------------------------------|
| Length of stay                                             |                              | Defined as the total number of days a baby received neonatal care (any level of care) from Daily Care General Information - LOCATIONS OF HIGHEST LEVEL OF CARE       | Numeric (age in days at discharge)                               |                                                                |
| Survival                                                   | PostnatalDayofDeath          | Where the following is true:<br>DayDateAnon where<br>DischargeDestination = 3                                                                                        | Numeric (age in days since birth if baby died)<br>999 = Survived |                                                                |
|                                                            | Death before day of interest | According to above<br>- Before day 3 (exclusion)<br>- Before day 7 (for competing risk analysis)<br>- Before day 14 (for competing risk analysis)<br>- Before day 28 | 0 = Yes<br>1 = No<br>9 = Unknown                                 |                                                                |
|                                                            | SurvivaltoDischarge          | Where the following is true:<br>DischargeDestination = 3 THEN (0)                                                                                                    | 0 = Died<br>1 = Survived to discharge<br>9 = Unknown             | Survival to discharge from neonatal care for the final episode |
|                                                            | FinalDischDestination        | N/A                                                                                                                                                                  | Text                                                             | Discharge destination for the final episode                    |
| Cause of death                                             | Causeofdeath                 | ICD-10                                                                                                                                                               |                                                                  |                                                                |
| Necrotising enterocolitis (possible more than one episode) | NEC_NNAP                     | Where the following is true:<br>NECTreatment > 0 AND<br>XRayAppearances in                                                                                           | 0 = No NEC<br>1 = NEC present<br>9 = Unknown                     | NNAP definition                                                |

|                             |  |                                                                                                                                                                                                                                                                                                                                                                                                                                                                                                                                                                                                                                                                                                                                                                                                                                                                                                                                                                                                                                                                                                                                                                                                                                                                  |                                                                     |                                            |
|-----------------------------|--|------------------------------------------------------------------------------------------------------------------------------------------------------------------------------------------------------------------------------------------------------------------------------------------------------------------------------------------------------------------------------------------------------------------------------------------------------------------------------------------------------------------------------------------------------------------------------------------------------------------------------------------------------------------------------------------------------------------------------------------------------------------------------------------------------------------------------------------------------------------------------------------------------------------------------------------------------------------------------------------------------------------------------------------------------------------------------------------------------------------------------------------------------------------------------------------------------------------------------------------------------------------|---------------------------------------------------------------------|--------------------------------------------|
|                             |  | <p>Pneumatosis<br/>Pneumoperitoneum AND</p> <p>ClinicalFindings in<br/>Increased/bilious aspirate<br/>Abdominal distension<br/>Bloody stools THEN (1)</p>                                                                                                                                                                                                                                                                                                                                                                                                                                                                                                                                                                                                                                                                                                                                                                                                                                                                                                                                                                                                                                                                                                        |                                                                     |                                            |
| <p>Severe_NEC_Battersby</p> |  | <p>Where the following is true:<br/>CauseOfDeath = 17<br/>OR<br/>PortMortemConfirmation = 1<br/>OR<br/>GastrointestinalDiagnoses OR PrincipleProceduresDuringStay<br/>OR PrincipalDiagnosisAtDischarge in<br/>Laparotomy<br/>Laparotomy approach NEC<br/>Colectomy and ileostomy NEC<br/>AND<br/>GastrointestinalDiagnosis or PrincipalDiagnosisAtDischarge in<br/>Necrotising enterocolitis<br/>Necrotising enterocolitis – confirmed<br/>Necrotising enterocolitis – perforated<br/>Necrotising enterocolitis – proven (on xray or surgery)<br/><br/>OR<br/>GastrointestinalDiagnoses OR PrincipalDiagnosisAtDischarge in<br/>Necrotising enterocolitis<br/>Necrotising enterocolitis – confirmed<br/>Necrotising enterocolitis – perforated<br/>Necrotising enterocolitis – proven (on xray or surgery)<br/><br/>AND<br/>DischargeDestination = 3<br/>OR<br/>GastrointestinalDiagnoses or PrincipalDiagnosisAtDischarge =<br/>Necrotising enterocolitis – perforated<br/>OR<br/>NECTreatment &gt;= 1 AND<br/>GastrointestinalDiagnoses OR PrincipalDiagnosisAtDischarge in<br/>Necrotising enterocolitis<br/>Necrotising enterocolitis – confirmed<br/>Necrotising enterocolitis – perforated<br/>Necrotising enterocolitis – proven (on xray or surgery)</p> | <p>0 = No severe NEC<br/>1 = Severe NEC present<br/>9 = Unknown</p> | <p>Battersby Severe<br/>NEC definition</p> |

|  |                            |                                                                                                                                                                                                                                                                                                                                                                                                                                                                                                                                                                                                                                                                                                                                                                                                                                                                                                                                                                                                        |                                                               |                                                   |
|--|----------------------------|--------------------------------------------------------------------------------------------------------------------------------------------------------------------------------------------------------------------------------------------------------------------------------------------------------------------------------------------------------------------------------------------------------------------------------------------------------------------------------------------------------------------------------------------------------------------------------------------------------------------------------------------------------------------------------------------------------------------------------------------------------------------------------------------------------------------------------------------------------------------------------------------------------------------------------------------------------------------------------------------------------|---------------------------------------------------------------|---------------------------------------------------|
|  |                            | <p>OR<br/>LaparotomyPerformed = Yes AND HistologyConfirmationNEC = Yes<br/>OR<br/>VisualInspectionConfirmationNEC = Yes<br/>THEN (1)</p>                                                                                                                                                                                                                                                                                                                                                                                                                                                                                                                                                                                                                                                                                                                                                                                                                                                               |                                                               |                                                   |
|  | <p>NEC_Any (pragmatic)</p> | <p>Where the following is true:<br/>(TreatmentNEC &gt;= 1<br/>OR<br/>Code in<br/>1010683 Necrotising enterocolitis – suspected<br/>10708 Necrotising enterocolitis – Perforated<br/>15809 Necrotizing enterocolitis<br/>15809 Necrotising enterocolitis - Confirmed)<br/>AND<br/>(5 or more days of nil by mouth where<br/>DayEnteralFeeds = 0 OR<br/>DayFormulaType = No entry OR<br/>VolumeMilk = 0/No entry<br/>AND<br/>5 consecutive days of antibiotics over the same five days of receiving nil by mouth where<br/>DailyDrugs in<br/>1010155 Benzyl Penicillin<br/>1010158 Augmentin<br/>1010179 Flucloxacillin<br/>500012 Flucloxacillin<br/>500016 Gentamicin<br/>500072 Co-amoxiclav<br/>500086 Co-amoxiclav<br/>500084 Ciprofloxacin<br/>500029 Netilmicin<br/>500002 Amikacin<br/>500211 Tazocin<br/>500023 Metronidazole<br/>500040 Vancomycin<br/>500007 Cefotaxime<br/>500004 Ampicillin<br/>500009 Cefuroxime<br/>500008 Ceftazidime<br/>500175 Ceftriaxone<br/>500032 Piperacillin</p> | <p>0 = No NEC present<br/>1 = NEC present<br/>9 = Unknown</p> | <p>Webbe NEC definition for any NEC treatment</p> |

|                                  |                        |                                                                                                                                                                                                                                                                                 |                            |  |
|----------------------------------|------------------------|---------------------------------------------------------------------------------------------------------------------------------------------------------------------------------------------------------------------------------------------------------------------------------|----------------------------|--|
|                                  |                        | 500206 Ofloxacillin<br>500005 Azlocillin<br>1010171 Linezolid<br>1010271 Cefalexin<br>1010139 Amoxicillin<br>500070 Amoxicillin<br>500128 Meropenem<br>500118 Imepemem<br>500145 Imipenem<br>OR<br>Died within 5 days of ' TreatmentNEC >= 1')                                  |                            |  |
|                                  | NEC onset day          | Postnatal age for NEC onset<br>TreatmentNEC >= 1<br>OR<br>First day where diagnosis 1010683 Necrotising enterocolitis – suspected<br>10708 Necrotising enterocolitis – Perforated<br>15809 Necrotizing enterocolitis<br>15809 Necrotising enterocolitis – Confirmed is recorded |                            |  |
|                                  | NEC onset PMA          | Postmenstrual age for NEC onset                                                                                                                                                                                                                                                 |                            |  |
| NEC related variables (raw data) | PostmortemConfirmation | If a necrotising enterocolitis diagnosis was made at any point at admission, specify if the post mortem confirmed it.                                                                                                                                                           | N No<br>Y Yes<br>9 Unknown |  |
|                                  | SurgicalProcedure      | Surgical procedure on the date and time specified<br>OPCS coded and/or SNOMED CT                                                                                                                                                                                                |                            |  |
|                                  | StomaInSitu            | N No<br>Y Yes                                                                                                                                                                                                                                                                   |                            |  |
|                                  | InvestigateAbdsigns    | N No<br>Y Yes                                                                                                                                                                                                                                                                   |                            |  |
|                                  | XrayAppearance         | ??<br>1 Pneumatosis<br>2 Air in the liver<br>3 Pneumoperitoneum<br>4 Fixed loop<br>5 Gasless<br>9 None of the above                                                                                                                                                             |                            |  |
|                                  | abdominalxrayfindings  | 01 Abdominal distension<br>02 Abdominal tenderness<br>03 Increased/ bilious aspirates<br>04 Abdominal discolouration<br>05 Abdominal mass<br>06 Bloody stools                                                                                                                   |                            |  |

1  
2  
3  
4  
5  
6  
7  
8  
9  
10  
11  
12  
13  
14  
15  
16  
17  
18  
19  
20  
21  
22  
23  
24  
25  
26  
27  
28  
29  
30  
31  
32  
33  
34  
35  
36  
37  
38  
39  
40  
41  
42  
43  
44  
45  
46

|                                                   |                             |                                                                                                                                                                                                                                                                                                                                                                                                      |                                                                             |  |
|---------------------------------------------------|-----------------------------|------------------------------------------------------------------------------------------------------------------------------------------------------------------------------------------------------------------------------------------------------------------------------------------------------------------------------------------------------------------------------------------------------|-----------------------------------------------------------------------------|--|
|                                                   |                             | 07 Mucousy stools<br>09 None of the above                                                                                                                                                                                                                                                                                                                                                            |                                                                             |  |
|                                                   | TransferredOutManagementNEC | N No<br>Y Yes                                                                                                                                                                                                                                                                                                                                                                                        |                                                                             |  |
|                                                   | necLaparotomy               | 0 Laparotomy not required<br>1 Laparotomy required but PATIENT too ill to carry it out<br>2 Laparotomy required and carried out                                                                                                                                                                                                                                                                      |                                                                             |  |
|                                                   | laparotomyConfirm           | N No<br>Y Yes                                                                                                                                                                                                                                                                                                                                                                                        |                                                                             |  |
|                                                   | necHistologyConfirmed       | 0 Not confirmed<br>1 Yes confirmed<br>9 No histological inspection/Not applicable                                                                                                                                                                                                                                                                                                                    |                                                                             |  |
| Infant: Sepsis suspected on first day             | SuspectedSepsisFirstDays    | Where the following is true:<br>DayDateAnon in first day of life AND first full day in unit<br>AND<br>SuspectedSepsis >= 1 (Y)                                                                                                                                                                                                                                                                       | 0 = No<br>1 = Yes<br>9 = Unknown                                            |  |
| Early onset blood stream infection                |                             | Defined from Infection Cultures (Episodic) recorded in the first 3 days/before day 3<br>• Pure growth of pathogen from blood<br>OR<br>• Pure growth of pathogen from CSF<br>OR<br>• Either a pure growth of a skin commensal or a mixed growth with ≥3 clinical signs at the time of blood sampling                                                                                                  |                                                                             |  |
| Late onset blood stream infection NNAP definition |                             | Defined from Infection Cultures (Episodic) recorded after day 3<br>• Pure growth of pathogen from blood<br>OR<br>• Pure growth of pathogen from CSF<br>OR<br>• Either a pure growth of a skin commensal or a mixed growth with ≥3 clinical signs at the time of blood sampling                                                                                                                       | Dichotomous (No infection=0, Infection=1)<br>Dichotomous<br><br>Unknown = 9 |  |
| Late onset infection, non-NNAP                    |                             | 5 consecutive days of antibiotic treatment defined as 5 consecutive days of any of the following (including in combination and changing during the 5 days) after day 3 Daily care medication<br>•1010155 Benzyl Penicillin<br>•1010158 Augmentin<br>•1010179 Flucloxacillin<br>•500012 Flucloxacillin<br>•500016 Gentamicin<br>•500072 Co-amoxiclav<br>•500086 Co-amoxiclav<br>•500084 Ciprofloxacin | Dichotomous (No infection=0, Infection=1)<br>Dichotomous                    |  |

1  
2  
3  
4  
5  
6  
7  
8  
9  
10  
11  
12  
13  
14  
15  
16  
17  
18  
19  
20  
21  
22  
23  
24  
25  
26  
27  
28  
29  
30  
31  
32  
33  
34  
35  
36  
37  
38  
39  
40  
41  
42  
43  
44  
45  
46

|                                   |  |                                                                                                                                                                                                                                                                                                                                                                                                                                                                                                                                                                                                                                                                                                                                                  |  |  |
|-----------------------------------|--|--------------------------------------------------------------------------------------------------------------------------------------------------------------------------------------------------------------------------------------------------------------------------------------------------------------------------------------------------------------------------------------------------------------------------------------------------------------------------------------------------------------------------------------------------------------------------------------------------------------------------------------------------------------------------------------------------------------------------------------------------|--|--|
|                                   |  | <ul style="list-style-type: none"> <li>•500029 Netilmicin</li> <li>•500002 Amikacin</li> <li>•500211 Tazocin</li> <li>•500023 Metronidazole</li> <li>•500040 Vancomycin</li> <li>•500007 Cefotaxime</li> <li>•500004 Ampicillin</li> <li>•500009 Cefuroxime</li> <li>•500008 Ceftazidime</li> <li>•500175 Ceftriaxone</li> <li>•500032 Piperacillin</li> <li>•500206 Ofloxacin</li> <li>•500005 Azlocillin</li> <li>•1010171 Linezolid</li> <li>•1010271 Cefalexin</li> <li>•1010139 Amoxicillin</li> <li>•500070 Amoxicillin</li> <li>•500128 Meropenem</li> <li>•500118 Imipenem</li> <li>•500145 Imipenem</li> <li>•500069 Ambisome (Liposomal Amphotericin)</li> <li>•500003 Amphotericin</li> <li>•1010195 Amphotericin Liposoma</li> </ul> |  |  |
| Early onset infection (pragmatic) |  | >5 consecutive days of antibiotic treatment defined as 6 consecutive days of any of the following (including in combination and changing during the 6 days) before day 3 Daily care medication                                                                                                                                                                                                                                                                                                                                                                                                                                                                                                                                                   |  |  |
| Time to reach full feeding        |  | First day of 3 consecutive days where parenteral nutrition or intravenous fluid are not recorded                                                                                                                                                                                                                                                                                                                                                                                                                                                                                                                                                                                                                                                 |  |  |

**Covariates/confounders**

|                          |                |                  |                              |                                           |
|--------------------------|----------------|------------------|------------------------------|-------------------------------------------|
| BadgerID                 | AnonPatientID  |                  | N/A                          | Episode-specific identifier for each baby |
| Gestational age at birth | GestationWeeks |                  | Numeric (10 - 49)            |                                           |
|                          | GestationDays  |                  | Numeric (0-6)<br>9 = Unknown |                                           |
|                          | GA total days  | Weeks x 7 + days |                              |                                           |

1  
2  
3  
4  
5  
6  
7  
8  
9  
10  
11  
12  
13  
14  
15  
16  
17  
18  
19  
20  
21  
22  
23  
24  
25  
26  
27  
28  
29  
30  
31  
32  
33  
34  
35  
36  
37  
38  
39  
40  
41  
42  
43  
44  
45  
46

|                            |                        |                                                                                                                                                                                                                                                                                                                                                                                                                                                                                                                                                                                                                                                                                                            |                                                                                                          |                                |
|----------------------------|------------------------|------------------------------------------------------------------------------------------------------------------------------------------------------------------------------------------------------------------------------------------------------------------------------------------------------------------------------------------------------------------------------------------------------------------------------------------------------------------------------------------------------------------------------------------------------------------------------------------------------------------------------------------------------------------------------------------------------------|----------------------------------------------------------------------------------------------------------|--------------------------------|
| Birth weight               | Birthweight            |                                                                                                                                                                                                                                                                                                                                                                                                                                                                                                                                                                                                                                                                                                            | Numeric (g)<br>99999 = Unknown                                                                           | Accepted range:<br>001 – 9998g |
| Birth head circumference   | BirthHeadCircumference | Can perhaps be useful to differentiate between symmetrical and asymmetrical IUGR                                                                                                                                                                                                                                                                                                                                                                                                                                                                                                                                                                                                                           |                                                                                                          |                                |
| Sex                        | Gender                 |                                                                                                                                                                                                                                                                                                                                                                                                                                                                                                                                                                                                                                                                                                            | 0 = Unknown<br>1 = Male<br>2 = Female<br>9 = Not specified                                               |                                |
| Birth weight z-score       |                        | Specify Marsal or Fenton or WHO                                                                                                                                                                                                                                                                                                                                                                                                                                                                                                                                                                                                                                                                            | Numeric<br>99999 = Unknown                                                                               |                                |
| Ethnicity                  | Race                   | Combine parental ethnicities (see row 36,39)<br>Parents Demographics ETHNIC CATEGORY (MOTHER) (categorical) Coded as: WHITE (A - British, B - Irish, C - Any other white background); MIXED (D - White and Black Caribbean, E - White and Black African, F - White and Asian, G - Any other mixed background); ASIAN OR ASIAN BRITISH (H - Indian, J - Pakistani, K - Bangladeshi, L - Any other Asian Background); BLACK OR BLACK BRITISH (M - Caribbean, N - African, P - Any other Black background); OTHER ETHNIC GROUPS (R - Chinese, S - Any other ethnic group); UNKNOWN (Z, DTA - Not stated, 99 - Not known)<br>This data item is based on self-reported ethnicity as recorded in maternity notes | ?e.g.<br>Categorised into four groups (White=1; Asian & Mixed=2; Black & Mixed=3; Other and not given=4) |                                |
| Smoking during pregnancy   | Smoking                | Pregnancy Details MOTHER CURRENT SMOKER AT BOOKING INDICATOR (categorical, codes 1-6)                                                                                                                                                                                                                                                                                                                                                                                                                                                                                                                                                                                                                      | 0 = No<br>1 = Yes<br>9 = Unknown                                                                         |                                |
| Multiplicity               | FetusNumber            | N/A                                                                                                                                                                                                                                                                                                                                                                                                                                                                                                                                                                                                                                                                                                        | Numeric<br>99 = Unknown                                                                                  |                                |
| Birth year                 | BirthYear              | N/A                                                                                                                                                                                                                                                                                                                                                                                                                                                                                                                                                                                                                                                                                                        | Numeric<br>9999 = Unknown                                                                                |                                |
| Birth year (mother)        | BirthYearMother        | N/A                                                                                                                                                                                                                                                                                                                                                                                                                                                                                                                                                                                                                                                                                                        | Numeric<br>9999 = Unknown                                                                                |                                |
| Parity of mother           | Primiparity            | Pregnancy Details PREGNANCY TOTAL PREVIOUS PREGNANCIES Dichotomous: code 00=Y; code 01- 29=N                                                                                                                                                                                                                                                                                                                                                                                                                                                                                                                                                                                                               | Primiparous: Dichotomous (Not first pregnancy=0; First pregnancy=1)                                      |                                |
| Maternal deprivation score | PostCodeMother         | LSOA centiles                                                                                                                                                                                                                                                                                                                                                                                                                                                                                                                                                                                                                                                                                              |                                                                                                          |                                |
|                            | MumEducation           |                                                                                                                                                                                                                                                                                                                                                                                                                                                                                                                                                                                                                                                                                                            |                                                                                                          |                                |
|                            | MumOccupation          |                                                                                                                                                                                                                                                                                                                                                                                                                                                                                                                                                                                                                                                                                                            |                                                                                                          |                                |
| Maternal Diabetes (Y/N)    | MaternalDiabetes       | Where the following is true:<br>ProblemsMedicalMother = 15 THEN (1)<br>ProblemsMedicalMother = 00 THEN (0)                                                                                                                                                                                                                                                                                                                                                                                                                                                                                                                                                                                                 | 0 = No maternal diabetes<br>1 = Maternal Diabetes Present<br>99 = Unknown                                | Blank entries coded in as 99   |

|                                                                                 |                             |                                                                                                                                                                                                                                                      |                                                                                         |                                       |
|---------------------------------------------------------------------------------|-----------------------------|------------------------------------------------------------------------------------------------------------------------------------------------------------------------------------------------------------------------------------------------------|-----------------------------------------------------------------------------------------|---------------------------------------|
| Maternal gestational diabetes (Y/N)                                             | MaternalGestDiabetes        | Where the following is true:<br>ProblemsDuringPregnancy = 33 THEN (1)<br>ProblemsDuringPregnancy = 00 THEN (0)                                                                                                                                       | 0 = No gestational diabetes<br>1 = Gestational diabetes present<br>99 = Unknown         | Blank entries coded in as 99          |
| Maternal pre-eclampsia requiring pre-term birth (Y/N)<br>Maternal pre-eclampsia | PreEclampsia                | Where the following is true:<br>ProblemsDuringPregnancy = 31 THEN (1)                                                                                                                                                                                | 0 = No pre-eclampsia<br>1 = Pre-eclampsia present<br>99 = Unknown                       | Blank entries coded in as 99          |
| Maternal gestational hypertension (Y/N)                                         | MaternalGestHypTension      | Where the following is true:<br>ProblemsDuringPregnancy = 30 THEN (1)                                                                                                                                                                                | 0 = No gestational hypertension<br>1 = Gestational hypertension present<br>99 = Unknown | Blank entries coded in as 99          |
| Maternal prolonged rupture of membranes                                         | ROMTimeAnon                 | Derived (Minutes)                                                                                                                                                                                                                                    | Numeric                                                                                 | Number of minutes from birth to event |
|                                                                                 | Prolonged_ROM               | Where the following is true:<br>ProblemsDuringPregnancy = 20 THEN (1)                                                                                                                                                                                | 0 = No prolonged rupture<br>1 = Prolonged rupture present                               |                                       |
| Maternal suspected chorioamnionitis (Y/N)                                       | Chorioamnionitis            | Where the following is true:<br>MaternalPyrexialInLabour38c = 1 OR<br>IntrapartumAntibioticsGiven = 1 THEN (1)                                                                                                                                       | 0 = No<br>1 = Yes<br>9 = Unknown                                                        | Blank entries coded in as 9           |
| Intrapartum Antibiotics                                                         | IntrapartumAntibioticsGiven | IntrapartumAntibioticsGiven = 1 THEN (1)                                                                                                                                                                                                             | 0 = No<br>1 = Yes<br>9 = Unknown                                                        |                                       |
| Maternal pyrexia                                                                | MaternalPyrexialInLabour    | MaternalPyrexialInLabour38c = 1 THEN (1)                                                                                                                                                                                                             | 0 = No<br>1 = Yes<br>9 = Unknown                                                        |                                       |
| Maternal GBS                                                                    | MaternalGBS                 | ProblemsInfctPregnancyMother = Group B streptococcus THEN (1)                                                                                                                                                                                        | 0 = No<br>1 = Yes<br>9 = Unknown                                                        |                                       |
| Maternal receipt of antenatal steroids (Y/N)                                    | MaternalAntenatalSteroids   | Where the following is true:<br>SteroidsAntenatalGiven = 1 AND SteroidsAntenatalCourses = 1 THEN (1)<br>SteroidsAntenatalGiven = 1 AND SteroidsAntenatalCourses = 2 THEN (2)<br>SteroidsAntenatalGiven = 0 AND SteroidsAntenatalCourses = 0 THEN (0) | 0 = None given<br>1 = Complete<br>2 = Incomplete<br>9 = Unknown                         |                                       |
| Maternal receipt of antenatal magnesium sulphate (Y/N)                          | MagnesiumSulphate           | N/A                                                                                                                                                                                                                                                  | 0 = No<br>1 = Yes<br>9 = Unknown                                                        |                                       |



|                                                          |                            |                                                                                                                                                                                                                                       |                                                                                                                                |  |
|----------------------------------------------------------|----------------------------|---------------------------------------------------------------------------------------------------------------------------------------------------------------------------------------------------------------------------------------|--------------------------------------------------------------------------------------------------------------------------------|--|
| Delivery mode                                            | ModeOfDelivery             | Emergency caesarean = 1<br>Elective caesarean = 2<br>Vaginal spontaneous = 3                                                                                                                                                          | 1 = emergency<br>2 = elective<br>3 = vaginal<br>9 = unknown                                                                    |  |
| Induced delivery                                         | Onsetoflabour              | Spontaneous = 1<br>Induced (medical and/or surgical) = 2<br>None (i.e. caesarean) = 3                                                                                                                                                 | 1 = spontaneous<br>2 = Induced<br>3 = None<br>9 = unknown                                                                      |  |
| Labour before caesarean                                  | ModeofDelivery Caesarean   | Yes<br>No                                                                                                                                                                                                                             | 0 = no labour<br>1 = labour                                                                                                    |  |
| Delivery categories                                      | Delivery categories        | Categorize above:<br>Vaginal AND Spontaneous = 1<br>Vaginal AND Induced = 2<br>Emergency caesarean AND labour = 3<br>Emergency caesarean AND nolabour = 4<br>Elective caesarean AND labour = 5<br>Elective caesarean AND nolabour = 6 | 1 = VagSpon<br>2 = VagInduc<br>3 = EmergCaesLab<br>4 = EmergCaesNolab<br>5 = ElectCaesLab<br>6 = ElectCaesNolab<br>9 = unknown |  |
| Infant Apgar score at 1 minutes                          | apgar_1min                 | N/A                                                                                                                                                                                                                                   | 0-10 Apgar score<br>99 = Unknown                                                                                               |  |
| Infant Apgar score at 5 minutes                          | apgar_5min                 | N/A                                                                                                                                                                                                                                   | 0-10 Apgar score<br>99 = Unknown                                                                                               |  |
| Infant Apgar score at 10 minutes                         | apgar_10min                | N/A                                                                                                                                                                                                                                   | 0-10 Apgar score<br>99 = Unknown                                                                                               |  |
| Spontaneous respiration time of onset                    | SpontaneousRespirationTime | 1 <1 mins<br>2 1-1.5 mins<br>3 1.6-2 mins<br>4 2.1-3 mins<br>5 3.1-4 mins<br>6 4.1-5 mins<br>7 > 5mins                                                                                                                                |                                                                                                                                |  |
| Infant: chest compressions administered (Y/N)            | CardiacMassage             | Where the following is true:<br>MethodsOfResuscitation = 16 THEN (1)                                                                                                                                                                  | 0 = No cardiac massage<br>1 = Cardiac massage<br>99 = Unknown                                                                  |  |
| Infant: Intubation at delivery (Y/N)                     | IntubationDelivery         | Where the following is true:<br>MethodsOfResuscitation = 15 THEN (1)                                                                                                                                                                  | 0 = No intubation<br>1 = Intubation<br>99 = Unknown                                                                            |  |
| Infant: Ventilation at delivery (Y/N)                    | VentilationDelivery        | Where the following is true:<br>MethodsOfResuscitation = 14 THEN (1)                                                                                                                                                                  | 0 = No IPPV<br>1 = IPPV<br>99 = Unknown                                                                                        |  |
| Infant: Emergency resuscitation drugs administered (Y/N) | ResusDrugsAdmin            | Where the following is true:<br>MethodsOfResuscitation = 17 OR<br>MethodsOfResuscitation = 88 THEN (1)                                                                                                                                | 0 = No resuscitation drugs administered                                                                                        |  |

|                                       |                              |                                                                                                                                                                                                                                                                                                                |                                                                                                                                        |  |
|---------------------------------------|------------------------------|----------------------------------------------------------------------------------------------------------------------------------------------------------------------------------------------------------------------------------------------------------------------------------------------------------------|----------------------------------------------------------------------------------------------------------------------------------------|--|
|                                       |                              |                                                                                                                                                                                                                                                                                                                | 1 = Resuscitation drugs administered<br>99 = Unknown                                                                                   |  |
| Infant: Surfactant administered (Y/N) | SurfactantGivenResuscitation | N/A                                                                                                                                                                                                                                                                                                            | 0 = No<br>1 = Yes<br>9 = Unknown                                                                                                       |  |
| Infant: Umbilical cord pH             | CordPhArterial               | N/A                                                                                                                                                                                                                                                                                                            | 6.00-8.00<br>9.99 = Unknown                                                                                                            |  |
|                                       | CordVenousPH                 | N/A                                                                                                                                                                                                                                                                                                            | 6.00-8.00<br>9.99 = Unknown                                                                                                            |  |
| Umbilical cord lactate                | CordILactate                 |                                                                                                                                                                                                                                                                                                                |                                                                                                                                        |  |
| Umbilical cord base excess            | CordBE                       | Labour and Delivery Details UMBILICAL CORD BLOOD BASE EXCESS CONCENTRATION (ARTERIAL) Continuous OR if not available use Labour and Delivery Details UMBILICAL CORD BLOOD BASE EXCESS CONCENTRATION (VENOUS)                                                                                                   | CordBaseExcess:<br>Continuous (to 1 decimal place)<br>CordBaseExcessMs:<br>Binary missing indicator created (Not missing=0; Missing=1) |  |
| Base excess 12h worst                 | WorstBaseWithin12            |                                                                                                                                                                                                                                                                                                                |                                                                                                                                        |  |
| Blood transfusion day 1-2             | BloodProductsTrans           | On day 1 and day 2<br>Daily care blood transfusion BLOOD TRANSFUSION PRODUCT TYPE                                                                                                                                                                                                                              | 1 = yes<br>0 = no                                                                                                                      |  |
| Umbilical catheters                   | LinesIn                      | Only on day 1-2 (admission)<br><br>1 Peripheral arterial line<br>2 Umbilical arterial line if THEN YES<br>3 Umbilical venous line if THEN YES<br>4 Percutaneous central venous line (long line)<br>5 Surgically inserted central venous line<br>6 Peripheral venous line<br>9 Not Applicable/ No Lines in Situ | 1 = yes<br>0 = no<br><br>9 = unknown                                                                                                   |  |
| Birth place                           | PlaceofBirthNHSCode          |                                                                                                                                                                                                                                                                                                                | Organization code                                                                                                                      |  |
| Time to admission                     |                              | Admission Details CRITICAL CARE START YEAR AND MONTH and NUMBER OF MINUTES (BIRTH TO EVENT)                                                                                                                                                                                                                    |                                                                                                                                        |  |
| Assisted Ventilation                  |                              | On day 1-2                                                                                                                                                                                                                                                                                                     |                                                                                                                                        |  |
| Surfactant therapy                    |                              | On day 1-2                                                                                                                                                                                                                                                                                                     |                                                                                                                                        |  |
| Feeding advancement (early feeding)   |                              | 198:9<br>E.g. any of the following items entered in the Daily Care Fluids and Feeding during the first 3 days<br>• Any entry (1-6) under ENTERAL FEED TYPE GIVEN                                                                                                                                               | Dichotomous (No enteral feeds=0; provided enteral feeds=1)                                                                             |  |

|                                                                   |                                |                                                                                                                                                                                                                                                                                                                                        |                                                                                                                                                                  |                                |
|-------------------------------------------------------------------|--------------------------------|----------------------------------------------------------------------------------------------------------------------------------------------------------------------------------------------------------------------------------------------------------------------------------------------------------------------------------------|------------------------------------------------------------------------------------------------------------------------------------------------------------------|--------------------------------|
|                                                                   |                                | <ul style="list-style-type: none"> <li>• OR any entry (0-88) under FORMULA MILK OR MILK FORTIFIER TYPE</li> <li>• OR any value &gt;0 for TOTAL VOLUME OF MILK RECEIVED</li> <li>• OR any entry (1-8) under ENTERAL FEEDING METHOD</li> </ul> <p>NO ENTERAL FEEDING GROUP DEFINED AS All other babies not fulfilling above criteria</p> |                                                                                                                                                                  |                                |
| Feeding                                                           |                                | <p>On day 1-2</p> <ol style="list-style-type: none"> <li>1 Suckling at the breast</li> <li>2 Mother's fresh expressed breast milk</li> <li>3 Mother's frozen expressed breast milk</li> <li>4 Donor expressed breast milk</li> <li>5 Breast milk fortifier</li> <li>6 Formula</li> <li>9 Not applicable (Nil by mouth)</li> </ol>      | <p>1 = Formula<br/>2 = Human milk<br/>3 = Mix ?<br/>0 = nil</p> <p>9 = unknown</p>                                                                               |                                |
| Probiotics                                                        |                                | On day 1-2                                                                                                                                                                                                                                                                                                                             | <p>1 = yes<br/>0 = no</p>                                                                                                                                        |                                |
| Fluids and feeding: Parenteral nutrition today (partial or total) | ParenteralNutrition            | PN on day1-2                                                                                                                                                                                                                                                                                                                           | <p>1= yes<br/>0 = no</p>                                                                                                                                         |                                |
| Unit of first admission                                           | ProviderNHSCode                | N/A                                                                                                                                                                                                                                                                                                                                    | <p>xxxxx - NHS organisational code<br/>ZZ210 - non-NHS England and Wales organisation (private/N.Ireland/Scotland)<br/>ZZ203 – Not known<br/>ZZ999 - Missing</p> |                                |
| Infant: Admission temperature                                     | FirstAdmitTemperature          | N/A                                                                                                                                                                                                                                                                                                                                    | <p>24-45<br/>77.7 = Not Recordable</p>                                                                                                                           | Measurement at first admission |
| Infant: Admission mean blood pressure                             | FirstAdmissionBP               | N/A                                                                                                                                                                                                                                                                                                                                    | <p>10-150<br/>999 = Unknown</p>                                                                                                                                  | Measurement at first admission |
| Infant: Admission blood glucose                                   | FirstAdmissionBloodGlucose     | N/A                                                                                                                                                                                                                                                                                                                                    | <p>0.0-50.0<br/>99.9 = Unknown</p>                                                                                                                               | Measurement at first admission |
| Infant: Admission heart rate                                      | FirstAdmissionHR               | N/A                                                                                                                                                                                                                                                                                                                                    | <p>50-350<br/>999 = Unknown</p>                                                                                                                                  | Measurement at first admission |
| Infant: Admission oxygen saturation                               | FirstAdmissionOxygenSaturation | N/A                                                                                                                                                                                                                                                                                                                                    | <p>10-100<br/>999 = Unknown</p>                                                                                                                                  | Measurement at first admission |

|                                                                |                                                    |                                                              |                                                                                                                                                                                                                                                                                                |                                                                                                      |                             |
|----------------------------------------------------------------|----------------------------------------------------|--------------------------------------------------------------|------------------------------------------------------------------------------------------------------------------------------------------------------------------------------------------------------------------------------------------------------------------------------------------------|------------------------------------------------------------------------------------------------------|-----------------------------|
| 1<br>2<br>3<br>4<br>5<br>6                                     | Infant: Surfactant administered on first day (Y/N) | SurfactantGivenFirstDays                                     | Where the following is true:<br>DayDateAnon in first day of life AND first full day in unit<br>AND<br>SurfactantGiven = 1 THEN (Y)                                                                                                                                                             | 0 = No<br>1 = Yes<br>9 = Unknown                                                                     |                             |
| 7<br>8<br>9<br>10<br>11                                        | Infant: Mechanical ventilation on first day (Y/N)  | RespiratorySupportFirstDays                                  | Where the following is true:<br>DayDateAnon in first day of life AND first full day in unit<br>AND<br>RespiratorySupport = 1 OR<br>AddedO2 = 11 OR<br>VentilationMode >= 1 THEN (1)                                                                                                            | 0 = No mechanical ventilation on first day<br>1 = Mechanical ventilation on first day<br>9 = Unknown | Blank entries coded as 9    |
| 12<br>13<br>14<br>15<br>16<br>17<br>18<br>19<br>20<br>21<br>22 | Infant: Inotropes administered on first day (Y/N)  | InotropesFirstDays                                           | Where the following is true:<br>DayDateAnon in first day of life AND first full day in unit<br>AND<br>DailyDrugs in<br>500098 Dopamine<br>500096 Dobutamine<br>500056 Adrenaline<br>500210 Noradrenaline<br>500116 Hydrocortisone<br>1010173 Milrinone<br>OR<br>InotropesGiven = 1<br>THEN (Y) | 0 = No<br>1 = Yes, Inotropes given today<br>9 = Unknown                                              | Blank entries coded in as 9 |
| 23<br>24<br>25<br>26<br>27<br>28                               | Hemodynamically significant PDA                    | PDA                                                          | Treated on day 1-2<br>Yes/No                                                                                                                                                                                                                                                                   |                                                                                                      |                             |
| 29<br>30<br>31                                                 |                                                    | Cardiovascular: Treatment for patent ductus arteriosus (PDA) | 1 Indometacin/Indomethacin<br>2 Ibuprofen<br>3 Surgery<br>9 Not applicable                                                                                                                                                                                                                     |                                                                                                      |                             |
| 32<br>33<br>34                                                 | Neurology: Central tone                            | Centraltone                                                  | At admission (On day 1-2)<br>1 Normal<br>2 Increased<br>3 Decreased                                                                                                                                                                                                                            | 0 = normal<br>1 = abnormal incl floppy                                                               |                             |
| 35<br>36<br>37                                                 | Admission: Time of cord clamping                   | CordClamp                                                    | Cord clamped immediately after birth                                                                                                                                                                                                                                                           | 0 = No<br>1 = Yes<br>9 = Unknown                                                                     |                             |
| 38<br>39<br>40<br>41<br>42<br>43<br>44<br>45<br>46             | Infant: Transfer on first day (Y/N)                | TransferOnFirstDay                                           | Where the following is true:<br>AdmitTimeAnon <= 1440 AND<br>DischTimeAnon <= 1440 AND<br>DischargeDestination does not equal 3 AND<br>ProviderCode is different from POBCode AND<br>EpisodeNumberBaby = 2 THEN (1)                                                                            | 0 = No<br>1 = Yes<br>9 = Unknown                                                                     |                             |

1  
2  
3  
4  
5  
6  
7  
8  
9  
10  
11  
12  
13  
14  
15  
16  
17  
18  
19  
20  
21  
22  
23  
24  
25  
26  
27  
28  
29  
30  
31  
32  
33  
34  
35  
36  
37  
38  
39  
40  
41  
42  
43  
44  
45  
46

|                                |                     |                                                                                                                                                                                                                                                                                         |                                                                                                                                                        |  |
|--------------------------------|---------------------|-----------------------------------------------------------------------------------------------------------------------------------------------------------------------------------------------------------------------------------------------------------------------------------------|--------------------------------------------------------------------------------------------------------------------------------------------------------|--|
|                                |                     | Same as:<br>Admission Details SITE CODE (OF ADMITTING NEONATAL UNIT) or ORGANISATION CODE (OF ADMITTING NEONATAL UNIT) Different from Baby Demographics SITE CODE (OF ACTUAL PLACE OF DELIVERY) or ORGANISATION CODE (OF ACTUAL PLACE OF DELIVERY) And Baby Demographics EPISODE NUMBER |                                                                                                                                                        |  |
|                                | TransferDestination | Derived from ProviderNHSCode                                                                                                                                                                                                                                                            | xxxxx - NHS organisational code<br>ZZ210 - non-NHS England and Wales organisation (private/N.Ireland/Scotland)<br>ZZ203 – Not known<br>ZZ999 - Missing |  |
| Level of initial neonatal unit | POBLevel            | Derived from POBNHSCode                                                                                                                                                                                                                                                                 | 0 = Non-NNU<br>1 = SCU<br>2 = LNU<br>3 = NICU                                                                                                          |  |
| Neonatal network               | POBNetwork          | Derived from POBNHSCode                                                                                                                                                                                                                                                                 | Text                                                                                                                                                   |  |

**Additional outcomes**

|                         |                    |                                                                                                               |                                                                                                                                           |                                              |
|-------------------------|--------------------|---------------------------------------------------------------------------------------------------------------|-------------------------------------------------------------------------------------------------------------------------------------------|----------------------------------------------|
| Brain injury on imaging | BrainInjuryImaging | Where the following is true:<br>LeftIVH OR RightIVH >= 3<br>OR<br>PVL = Y THEN (1)                            | 0 = No brain injury on imaging<br>1 = Brain injury on imaging<br>9 = Unknown                                                              | Blank entries coded as 9                     |
| Treated ROP             | Treated_ROP        | Where the following is true:<br>ROPSurgery = 1 OR<br>RightEyeSurgery = 1,2,3,4 OR<br>LeftEyeSurgery = 1,2,3,4 | 0 = No treatment<br>1 = Treatment given                                                                                                   |                                              |
| Maximum stage of ROP    | Max_ROP            | N/A                                                                                                           | 0 – No ROP<br>1 – Stage 1 ROP<br>2 - Stage 2 ROP<br>3 – Stage 3 ROP<br>4 – Stage 4 ROP<br>5 – Stage 5 ROP<br>A – Aggressive posterior ROP | The maximum stage between right and left eye |

|                                                       |                         |                                                                                                                                                                                                                                                                                                                                                                                                      |                                                                                                    |                                |
|-------------------------------------------------------|-------------------------|------------------------------------------------------------------------------------------------------------------------------------------------------------------------------------------------------------------------------------------------------------------------------------------------------------------------------------------------------------------------------------------------------|----------------------------------------------------------------------------------------------------|--------------------------------|
| Bronchopulmonary dysplasia                            | BPD                     | Where the following is true:<br>CGA = 36 calculated from GestationWeeks and GestationDays<br>AND<br>RespiratorySupport = 1 OR<br>VentilationMode >= 1 OR<br>AddedO2 > 0 THEN (1)                                                                                                                                                                                                                     | 0 = No respiratory support given at 36 weeks<br>1 = Respiratory support at 36 weeks<br>9 = Unknown | Blank entries coded as 9       |
| Need for surgical procedures (possible more than one) | SurgicalProcedures      | Where the following is true:<br>PrincipleProceduresDuringStay =<br>100033 Surgery for meconium ileus (von)<br>100076 Skin or soft tissue surgery requiring general or spinal anaesthesia (Description Required)<br>11222 Closure of small intestine/ileal perforation<br>11501 Laparoscopy<br>11904 Colostomy<br>11905 Ileostomy<br>1010826 Major surgery<br>OR<br>MajorSurgeryToday = Y<br>THEN (1) | 0 = No<br>1 = Yes<br>9 = Unknown                                                                   | Blank entries coded as 9       |
| Seizures                                              | Seizures                | Where the following is true:<br>PrincipalDiagnosisAtDischarge = 10957 Seizures<br>15192 Seizure disorder<br>15194 Seizure disorder (cause unknown)<br>15195 Status epilepticus<br>15848 Seizures<br>OR<br>Convulsions = 1 THEN (1)                                                                                                                                                                   | 0 = None<br>1 = Seizures at discharge<br>9 = Unknown                                               | Blank entries coded as 9       |
| Weight at 36 weeks corrected gestational age (CGA)    | CGA_weight              | Where the following is true:<br>DayWorkingWeight at 36 weeks (+/- 3 days) CGA                                                                                                                                                                                                                                                                                                                        | Numeric (g)<br>99999 = Unknown                                                                     | Accepted range:<br>001 – 9998g |
| Exact CGA on day of measurement                       | CGA_exact               | Calculated from DayDateAnon and GestationWeeks and GestationDays                                                                                                                                                                                                                                                                                                                                     | Numeric                                                                                            |                                |
| Weight at discharge                                   | DischWeightFinalEps     | DayWorkingWeight on the last day of the last episode                                                                                                                                                                                                                                                                                                                                                 | Numeric (g)<br>99999 = Unknown                                                                     | Accepted range:<br>001 – 9998g |
| Weight SDS at discharge                               |                         | Defined as the following data item on the final day of neonatal care: • Daily Care General Information PERSON WEIGHT IN GRAMS<br>If final day is not entered, the penultimate day is used                                                                                                                                                                                                            | Continuous                                                                                         |                                |
| Head circumference at discharge                       | DischHeadCircumFinalEps | DayHeadCirc on the last day of the last episode                                                                                                                                                                                                                                                                                                                                                      | Numeric (cm)<br>99.9 = Unknown                                                                     |                                |
| CGA day of discharge                                  | CGA_DischFinalEps       | Calculated from DayDateAnon and GestationWeeks of the last episode                                                                                                                                                                                                                                                                                                                                   | Numeric                                                                                            |                                |

1  
2  
3  
4  
5  
6  
7  
8  
9  
10  
11  
12  
13  
14  
15  
16  
17  
18  
19  
20  
21  
22  
23  
24  
25  
26  
27  
28  
29  
30  
31  
32  
33  
34  
35  
36  
37  
38  
39  
40  
41  
42  
43  
44  
45  
46

|                                                                         |                                  |                                                                                                                                       |                                                             |  |
|-------------------------------------------------------------------------|----------------------------------|---------------------------------------------------------------------------------------------------------------------------------------|-------------------------------------------------------------|--|
| Blindness                                                               | Vision_impairment                | Where the following is true:<br>Vision_visual_problems = 1 OR<br>vision_defect_not_correctable<br>= 1 OR<br>Vision_blind = 1 THEN (1) | 0 = No<br>1 = Yes<br>9 = Unknown                            |  |
| Deafness                                                                | auditory_hearing_impairment      | N/A                                                                                                                                   | 0 = No<br>1 = Yes<br>9 = Unknown                            |  |
| Ability to walk                                                         | neuromotor_unable_walk_without_a | N/A                                                                                                                                   | 0 = No<br>1 = Yes<br>9 = Unknown                            |  |
| Exclusions for congenital gastrointestinal malformations                | Exclusions_Malformations         | Where the following is true:<br>Diagnosis table code in <u>eTable1</u> THEN (1)                                                       | 0 = No, none of the listed malformations present<br>1 = Yes |  |
| Exclusions for life-limiting conditions or conditions requiring surgery | Exclusions_LifeLimitingOrSurgery | Where the following is true:<br>Diagnosis table code in <u>eTable2</u> THEN (1)                                                       | 0 = No, none of the conditions present<br>1 = Yes           |  |
| Clinical diagnoses at discharge                                         | DiagnosesAtDischarge             | ICD-10 and/or SNOMED CT<br>Can be derived from daily records.<br>[Secondary/exploratory outcomes]                                     | For each selected outcome<br>0=No<br>1=Yes                  |  |
|                                                                         |                                  |                                                                                                                                       |                                                             |  |

For peer review only

## Appendix 2. DAG code for dagitty.net (for direct insertion on website browser platform)

```

dag {
bb="0,0,1,1"
"Abruptio/bleeding" [latent,pos="0.146,0.569"]
"Anemia/Transfusion" [pos="0.304,0.710"]
"Antenatal steroids" [pos="0.571,0.355"]
"Assisted ventilation" [pos="0.372,0.734"]
"Clinical signs" [adjusted,pos="0.395,0.643"]
"Delivery mode and C-section type" [adjusted,pos="0.488,0.294"]
"Feeding initiation" [pos="0.544,0.773"]
"Fetal flow" [latent,pos="0.276,0.465"]
"Formula feeding" [pos="0.469,0.788"]
"Maternal antibiotics " [pos="0.491,0.203"]
"Maternal infection" [adjusted,pos="0.148,0.457"]
"Probiotic initiation" [pos="0.625,0.754"]
"Site/outborn" [adjusted,pos="0.516,0.648"]
"Surfactant therapy" [pos="0.367,0.806"]
"Umbilical catheters" [pos="0.241,0.736"]
AB [exposure,pos="0.510,0.486"]
BW [adjusted,pos="0.434,0.486"]
Dyscolonization [latent,pos="0.556,0.261"]
Ethnicity [pos="0.252,0.204"]
GA [adjusted,pos="0.409,0.385"]
GDM [pos="0.386,0.068"]
IUGR [adjusted,pos="0.361,0.484"]
Ischemia [latent,pos="0.304,0.632"]
Multiplicity [pos="0.311,0.209"]
NEC [outcome,pos="0.609,0.483"]
PDA [pos="0.217,0.667"]
Parity [pos="0.290,0.143"]
Preeclampsia [pos="0.413,0.250"]
SES [pos="0.309,0.047"]
Sepsis [pos="0.227,0.567"]
Sex [pos="0.239,0.272"]
Smoking [pos="0.337,0.097"]
"Abruptio/bleeding" -> "Anemia/Transfusion" [pos="0.243,0.615"]
"Abruptio/bleeding" -> Ischemia
"Anemia/Transfusion" -> Ischemia
"Anemia/Transfusion" -> NEC
"Antenatal steroids" -> "Clinical signs" [pos="0.489,0.410"]
"Antenatal steroids" -> NEC
"Assisted ventilation" -> "Surfactant therapy"
"Assisted ventilation" -> NEC
"Clinical signs" -> "Assisted ventilation"
"Clinical signs" -> AB [pos="0.386,0.578"]
"Clinical signs" -> NEC [pos="0.423,0.577"]
"Delivery mode and C-section type" -> "Antenatal steroids"
"Delivery mode and C-section type" -> AB
"Delivery mode and C-section type" -> Dyscolonization
"Delivery mode and C-section type" -> GA
"Delivery mode and C-section type" -> NEC
"Feeding initiation" -> NEC [pos="0.601,0.675"]

```



## Appendix 2. DAG code for dagitty.net (for direct insertion on website browser platform)

```

1 "Fetal flow" -> "Delivery mode and C-section type"
2 [pos="0.261,0.334"]
3
4 "Fetal flow" -> IUGR
5
6 "Fetal flow" -> NEC [pos="0.385,0.603"]
7
8 "Formula feeding" -> NEC [pos="0.555,0.719"]
9
10 "Maternal antibiotics " -> Dyscolonization
11 "Maternal antibiotics " -> NEC [pos="0.642,0.236"]
12 "Maternal infection" -> "Clinical signs" [pos="0.362,0.575"]
13 "Maternal infection" -> "Delivery mode and C-section type"
14 [pos="0.238,0.289"]
15 "Maternal infection" -> "Maternal antibiotics " [pos="0.229,0.267"]
16 "Maternal infection" -> AB [pos="0.322,0.356"]
17 "Maternal infection" -> NEC [pos="0.575,0.705"]
18 "Maternal infection" -> Sepsis
19 "Probiotic initiation" -> NEC [pos="0.639,0.652"]
20
21 "Site/outborn" -> "Clinical signs"
22 "Site/outborn" -> "Feeding initiation"
23 "Site/outborn" -> "Formula feeding"
24 "Site/outborn" -> "Probiotic initiation"
25 "Site/outborn" -> AB
26 "Site/outborn" -> NEC
27
28 "Surfactant therapy" -> NEC
29
30 "Umbilical catheters" -> Ischemia
31
32 AB -> NEC
33 BW -> AB
34 BW -> NEC [pos="0.526,0.569"]
35 Dyscolonization -> NEC [pos="0.604,0.306"]
36 Ethnicity -> NEC [pos="0.720,0.028"]
37 GA -> "Antenatal steroids"
38 GA -> AB
39 GA -> BW
40 GA -> NEC
41 GDM -> NEC [pos="0.806,0.106"]
42 IUGR -> "Delivery mode and C-section type" [pos="0.319,0.358"]
43 IUGR -> BW
44 IUGR -> NEC [pos="0.512,0.614"]
45 Ischemia -> "Clinical signs"
46 Ischemia -> NEC
47 Multiplicity -> NEC [pos="0.697,0.057"]
48 PDA -> Ischemia
49 Parity -> NEC [pos="0.756,0.077"]
50 Preeclampsia -> "Delivery mode and C-section type"
51 SES -> GDM
52 SES -> NEC [pos="0.852,0.023"]
53 SES -> Smoking
54 Sepsis -> "Clinical signs" [pos="0.346,0.586"]
55 Sepsis -> Ischemia
56 Sepsis -> NEC [pos="0.478,0.596"]
57 Sex -> NEC [pos="0.690,0.026"]
58 Smoking -> NEC [pos="0.780,0.096"]
59 }
60

```

STROBE Statement—Checklist of items that should be included in reports of *cohort studies*

|                              | Item No | Recommendation                                                                                                                                                                                                                                                                                                                                                                                            |
|------------------------------|---------|-----------------------------------------------------------------------------------------------------------------------------------------------------------------------------------------------------------------------------------------------------------------------------------------------------------------------------------------------------------------------------------------------------------|
| <b>Title and abstract</b>    | 1       | (a) Indicate the study's design with a commonly used term in the title or the abstract<br><b>p2 L10</b><br>(b) Provide in the abstract an informative and balanced summary of what was done and what was found <b>NA</b>                                                                                                                                                                                  |
| <b>Introduction</b>          |         |                                                                                                                                                                                                                                                                                                                                                                                                           |
| Background/rationale         | 2       | Explain the scientific background and rationale for the investigation being reported<br><b>P4</b>                                                                                                                                                                                                                                                                                                         |
| Objectives                   | 3       | State specific objectives, including any prespecified hypotheses <b>P5 line 6-10</b>                                                                                                                                                                                                                                                                                                                      |
| <b>Methods</b>               |         |                                                                                                                                                                                                                                                                                                                                                                                                           |
| Study design                 | 4       | Present key elements of study design early in the paper <b>P5 Line 11 onwards</b>                                                                                                                                                                                                                                                                                                                         |
| Setting                      | 5       | Describe the setting, locations, and relevant dates, including periods of recruitment, exposure, follow-up, and data collection <b>P5 L15-21</b>                                                                                                                                                                                                                                                          |
| Participants                 | 6       | (a) Give the eligibility criteria, and the sources and methods of selection of participants. Describe methods of follow-up <b>P5 L22-26</b><br>(b) For matched studies, give matching criteria and number of exposed and unexposed <b>P8 L1 - 5</b>                                                                                                                                                       |
| Variables                    | 7       | Clearly define all outcomes, exposures, predictors, potential confounders, and effect modifiers. Give diagnostic criteria, if applicable <b>P8 L7 on and table 1</b>                                                                                                                                                                                                                                      |
| Data sources/<br>measurement | 8*      | For each variable of interest, give sources of data and details of methods of assessment (measurement). Describe comparability of assessment methods if there is more than one group <b>Table 1</b>                                                                                                                                                                                                       |
| Bias                         | 9       | Describe any efforts to address potential sources of bias <b>P9 -13</b>                                                                                                                                                                                                                                                                                                                                   |
| Study size                   | 10      | Explain how the study size was arrived at <b>P7 L23 – P8 L5</b>                                                                                                                                                                                                                                                                                                                                           |
| Quantitative variables       | 11      | Explain how quantitative variables were handled in the analyses. If applicable, describe which groupings were chosen and why <b>P9</b>                                                                                                                                                                                                                                                                    |
| Statistical methods          | 12      | (a) Describe all statistical methods, including those used to control for confounding <b>P9 -13</b><br>(b) Describe any methods used to examine subgroups and interactions <b>P12 L2 -12</b><br>(c) Explain how missing data were addressed <b>P14 L14-17</b><br>(d) If applicable, explain how loss to follow-up was addressed <b>NA</b><br>(e) Describe any sensitivity analyses <b>P12 L2 – P13 L2</b> |
| <b>Results</b>               |         |                                                                                                                                                                                                                                                                                                                                                                                                           |
| Participants                 | 13*     | (a) Report numbers of individuals at each stage of study—eg numbers potentially eligible, examined for eligibility, confirmed eligible, included in the study, completing follow-up, and analysed <b>NA</b><br>(b) Give reasons for non-participation at each stage <b>NA</b><br>(c) Consider use of a flow diagram <b>NA</b>                                                                             |
| Descriptive data             | 14*     | (a) Give characteristics of study participants (eg demographic, clinical, social) and information on exposures and potential confounders <b>NA</b><br>(b) Indicate number of participants with missing data for each variable of interest<br>(c) Summarise follow-up time (eg, average and total amount) <b>NA</b>                                                                                        |
| Outcome data                 | 15*     | Report numbers of outcome events or summary measures over time <b>NA</b>                                                                                                                                                                                                                                                                                                                                  |
| Main results                 | 16      | (a) Give unadjusted estimates and, if applicable, confounder-adjusted estimates and their precision (eg, 95% confidence interval). Make clear which confounders were adjusted for and why they were included <b>NA</b>                                                                                                                                                                                    |

|    |                          |                                                                                               |
|----|--------------------------|-----------------------------------------------------------------------------------------------|
| 1  |                          | (b) Report category boundaries when continuous variables were categorized <b>NA</b>           |
| 2  |                          | (c) If relevant, consider translating estimates of relative risk into absolute risk for a     |
| 3  |                          | meaningful time period <b>NA</b>                                                              |
| 4  |                          |                                                                                               |
| 5  | Other analyses           | 17 Report other analyses done—eg analyses of subgroups and interactions, and                  |
| 6  |                          | sensitivity analyses <b>NA</b>                                                                |
| 7  |                          |                                                                                               |
| 8  | <b>Discussion</b>        |                                                                                               |
| 9  | Key results              | 18 Summarise key results with reference to study objectives <b>NA</b>                         |
| 10 | Limitations              | 19 Discuss limitations of the study, taking into account sources of potential bias or         |
| 11 |                          | imprecision. Discuss both direction and magnitude of any potential <b>bias P15 L20 -</b>      |
| 12 |                          | <b>25</b>                                                                                     |
| 13 |                          |                                                                                               |
| 14 | Interpretation           | 20 Give a cautious overall interpretation of results considering objectives, limitations,     |
| 15 |                          | multiplicity of analyses, results from similar studies, and other relevant evidence <b>NA</b> |
| 16 |                          |                                                                                               |
| 17 | Generalisability         | 21 Discuss the generalisability (external validity) of the study results <b>P15 L10 -15</b>   |
| 18 |                          |                                                                                               |
| 19 | <b>Other information</b> |                                                                                               |
| 20 | Funding                  | 22 Give the source of funding and the role of the funders for the present study and, if       |
| 21 |                          | applicable, for the original study on which the present article is based <b>P16 L11-14</b>    |
| 22 |                          |                                                                                               |

\*Give information separately for exposed and unexposed groups.

**Note:** An Explanation and Elaboration article discusses each checklist item and gives methodological background and published examples of transparent reporting. The STROBE checklist is best used in conjunction with this article (freely available on the Web sites of PLoS Medicine at <http://www.plosmedicine.org/>, Annals of Internal Medicine at <http://www.annals.org/>, and Epidemiology at <http://www.epidem.com/>). Information on the STROBE Initiative is available at <http://www.strobe-statement.org>.
