# Supplementary material for: Early antibiotic use and incidence of necrotising enterocolitis in very preterm infants: a protocol for a UK based observational study using routinely recorded data
Source: PubMed Central journal article supplement — BMJ Open. 2022 Nov 15;12(11):e065934. doi: 10.1136/bmjopen-2022-065934 (PMC9667987; doi:10.1136/bmjopen-2022-065934), 2022-11-15
Supplement: bmjopen-2022-065934supp002.pdf [file bmjopen-2022-065934supp002.pdf]

Early antibiotic use and incidence of necrotising enterocolitis in very preterm infants: A UK based observational study using routinely recorded data

## Appendix 2. DAG code for dagitty.net (for direct insertion on website browser platform)

```
dag {
bb="0,0,1,1"
"Abruptio/bleeding" [latent,pos="0.146,0.569"]
"Anemia/Transfusion" [pos="0.304,0.710"]
"Antenatal steroids" [pos="0.571,0.355"]
"Assisted ventilation" [pos="0.372,0.734"]
"Clinical signs" [adjusted,pos="0.395,0.643"]
"Delivery mode and C-section type" [adjusted,pos="0.488,0.294"]
"Feeding initiation" [pos="0.544,0.773"]
"Fetal flow" [latent,pos="0.276,0.465"]
"Formula feeding" [pos="0.469,0.788"]
"Maternal antibiotics " [pos="0.491,0.203"]
"Maternal infection" [adjusted,pos="0.148,0.457"]
"Probiotic initiation" [pos="0.625,0.754"]
"Site/outborn" [adjusted,pos="0.516,0.648"]
"Surfactant therapy" [pos="0.367,0.806"]
"Umbilical catheters" [pos="0.241,0.736"]
AB [exposure,pos="0.510,0.486"]
BW [adjusted,pos="0.434,0.486"]
Dyscolonization [latent,pos="0.556,0.261"]
Ethnicity [pos="0.252,0.204"]
GA [adjusted,pos="0.409,0.385"]
GDM [pos="0.386,0.068"]
IUGR [adjusted,pos="0.361,0.484"]
Ischemia [latent,pos="0.304,0.632"]
Multiplicity [pos="0.311,0.209"]
NEC [outcome,pos="0.609,0.483"]
PDA [pos="0.217,0.667"]
Parity [pos="0.290,0.143"]
Preeclampsia [pos="0.413,0.250"]
SES [pos="0.309,0.047"]
Sepsis [pos="0.227,0.567"]
Sex [pos="0.239,0.272"]
Smoking [pos="0.337,0.097"]
"Abruptio/bleeding" -> "Anemia/Transfusion" [pos="0.243,0.615"]
"Abruptio/bleeding" -> Ischemia
"Anemia/Transfusion" -> Ischemia
"Anemia/Transfusion" -> NEC
"Antenatal steroids" -> "Clinical signs" [pos="0.489,0.410"]
"Antenatal steroids" -> NEC
"Assisted ventilation" -> "Surfactant therapy"
"Assisted ventilation" -> NEC
"Clinical signs" -> "Assisted ventilation"
"Clinical signs" -> AB [pos="0.386,0.578"]
"Clinical signs" -> NEC [pos="0.423,0.577"]
"Delivery mode and C-section type" -> "Antenatal steroids"
"Delivery mode and C-section type" -> AB
"Delivery mode and C-section type" -> Dyscolonization
"Delivery mode and C-section type" -> GA
"Delivery mode and C-section type" -> NEC
"Feeding initiation" -> NEC [pos="0.601,0.675"]
```

Early antibiotic use and incidence of necrotising enterocolitis in very preterm infants: A UK based observational study using routinely recorded data

## Appendix 2. DAG code for dagitty.net (for direct insertion on website browser platform)

```
"Fetal flow" -> "Delivery mode and C-section type"
[pos="0.261,0.334"]
"Fetal flow" -> IUGR
"Fetal flow" -> NEC [pos="0.385,0.603"]
"Formula feeding" -> NEC [pos="0.555,0.719"]
"Maternal antibiotics " -> Dyscolonization
"Maternal antibiotics " -> NEC [pos="0.642,0.236"]
"Maternal infection" -> "Clinical signs" [pos="0.362,0.575"]
"Maternal infection" -> "Delivery mode and C-section type"
[pos="0.238,0.289"]
"Maternal infection" -> "Maternal antibiotics " [pos="0.229,0.267"]
"Maternal infection" -> AB [pos="0.322,0.356"]
"Maternal infection" -> NEC [pos="0.575,0.705"]
"Maternal infection" -> Sepsis
"Probiotic initiation" -> NEC [pos="0.639,0.652"]
"Site/outborn" -> "Clinical signs"
"Site/outborn" -> "Feeding initiation"
"Site/outborn" -> "Formula feeding"
"Site/outborn" -> "Probiotic initiation"
"Site/outborn" -> AB
"Site/outborn" -> NEC
"Surfactant therapy" -> NEC
"Umbilical catheters" -> Ischemia
AB -> NEC
BW -> AB
BW -> NEC [pos="0.526,0.569"]
Dyscolonization -> NEC [pos="0.604,0.306"]
Ethnicity -> NEC [pos="0.720,0.028"]
GA -> "Antenatal steroids"
GA -> AB
GA -> BW
GA -> NEC
GDM -> NEC [pos="0.806,0.106"]
IUGR -> "Delivery mode and C-section type" [pos="0.319,0.358"]
IUGR -> BW
IUGR -> NEC [pos="0.512,0.614"]
Ischemia -> "Clinical signs"
Ischemia -> NEC
Multiplicity -> NEC [pos="0.697,0.057"]
PDA -> Ischemia
Parity -> NEC [pos="0.756,0.077"]
Preeclampsia -> "Delivery mode and C-section type"
SES -> GDM
SES -> NEC [pos="0.852,0.023"]
SES -> Smoking
Sepsis -> "Clinical signs" [pos="0.346,0.586"]
Sepsis -> Ischemia
Sepsis -> NEC [pos="0.478,0.596"]
Sex -> NEC [pos="0.690,0.026"]
Smoking -> NEC [pos="0.780,0.096"]
}
```
