# Supplementary material for: Early antibiotic use and incidence of necrotising enterocolitis in very preterm infants: a protocol for a UK based observational study using routinely recorded data
Source: PubMed Central journal article supplement — BMJ Open. 2022 Nov 15;12(11):e065934. doi: 10.1136/bmjopen-2022-065934 (PMC9667987; doi:10.1136/bmjopen-2022-065934), 2022-11-15
Supplement: bmjopen-2022-065934supp003.pdf [file bmjopen-2022-065934supp003.pdf]

| Clevermed code | ICD-10 code | Diagnosis                                                                             |
|----------------|-------------|---------------------------------------------------------------------------------------|
| 10741          | Q39.0       | Oesophageal atresia without distal fistula                                            |
| 16195          | Q39.0       | Atresia of oesophagus without fistula                                                 |
| 10740          | Q39.1       | Oesophageal atresia with distal tracheo-oesophageal fistula                           |
| 16196          | Q39.1       | Atresia of oesophagus with tracheo-oesophageal fistula (TOF)                          |
| 16197          | Q39.2       | Congenital tracheo-oesophageal fistula without atresia (TOF)                          |
| 10273          | Q39.3       | Congenital stenosis of the oesophagus                                                 |
| 16198          | Q39.3       | Congenital stenosis and stricture of oesophagus                                       |
| 16199          | Q39.4       | Oesophageal web                                                                       |
| 10358          | Q41.0       | Duodenal atresia / stenosis / web (specify)                                           |
| 16212          | Q41.0       | Congenital absence, atresia and stenosis of duodenum                                  |
| 16213          | Q41.0       | DA Duodenal atresia / stenosis                                                        |
| 10605          | Q41.1       | Jejunal atresia / stenosis (specify)                                                  |
| 16214          | Q41.1       | JA Jejunal atresia / stenosis                                                         |
| 10541          | Q41.2       | Ileal atresia / stenosis (specify)                                                    |
| 16215          | Q41.2       | Congenital absence, atresia and stenosis of ileum                                     |
| 16216          | Q41.2       | IA Ileal atresia / stenosis                                                           |
| 16217          | Q41.X       | Congenital absence, atresia and stenosis of small intestine                           |
| 16218          | Q42.0       | Congenital absence, atresia and stenosis of rectum with fistula                       |
| 10496          | Q42.00      | High anorectal anomaly with rectourethral fistula                                     |
| 10497          | Q42.01      | High anorectal anomaly with rectovesical fistula                                      |
| 10498          | Q42.02      | High anorectal anomaly with rectovulval fistula                                       |
| 10495          | Q42.03      | High anorectal anomaly with rectocutaneous fistula                                    |
| 10494          | Q42.04      | High anorectal anomaly with rectocloacal fistula                                      |
| 10493          | Q42.08      | High anorectal anomaly with fistula (specify)                                         |
| 10499          | Q42.1       | High anorectal anomaly without fistula                                                |
| 16219          | Q42.1       | Congenital absence, atresia and stenosis of rectum without fistula                    |
| 16220          | Q42.2       | Congenital absence, atresia and stenosis of anus with fistula                         |
| 10636          | Q42.20      | Low anorectal anomaly with anocutaneous fistula                                       |
| 10637          | Q42.21      | Low anorectal anomaly with anovestibular fistula                                      |
| 10638          | Q42.28      | Low anorectal anomaly with fistula (other specify)                                    |
| 10639          | Q42.3       | Low anorectal anomaly without fistula                                                 |
| 16221          | Q42.3       | Congenital absence, atresia and stenosis of anus without fistula                      |
| 10240          | Q42.31      | Congenital anal stenosis                                                              |
| 16222          | Q42.8       | Congenital absence, atresia and stenosis of anus of other parts of large intestine    |
| 16223          | Q429        | Congenital absence, atresia and stenosis of anus of large intestine, part unspecified |
| 16224          | Q42X        | Congenital absence, atresia and stenosis of large intestine                           |
| 16235          | Q43.7       | Persistent cloaca                                                                     |

Supplementary Table 1 Gastrointestinal anomalies

| Clevermed code | ICD-10 code | Diagnosis                                                                |
|----------------|-------------|--------------------------------------------------------------------------|
| 15890          | Q00.0       | Anencephaly                                                              |
| 15891          | Q00.1       | Craniorachischisis                                                       |
| 15892          | Q00.2       | Iniencephaly                                                             |
| 15893          | Q00.X       | Anencephaly and similar malformations                                    |
| 15894          | Q01.0       | Frontal encephalocele                                                    |
| 15895          | Q01.1       | Nasofrontal encephalocele                                                |
| 15896          | Q01.2       | Occipital encephalocele                                                  |
| 15897          | Q01.8       | Encephalocele of other sites                                             |
| 15898          | Q01.9       | Encephalocele (unknown or unspecified cause)                             |
| 15899          | Q01.X       | Encephalocele                                                            |
| 15918          | Q04.2       | Holoprosencephaly                                                        |
| 15926          | Q05.0       | Cervical spina bifida with hydrocephalus                                 |
| 15927          | Q05.1       | Thoracic spina bifida with hydrocephalus                                 |
| 15928          | Q05.2       | Lumbar spina bifida with hydrocephalus                                   |
| 15929          | Q05.3       | Sacral spina bifida with hydrocephalus                                   |
| 15930          | Q05.4       | (unknown or unspecified cause) spina bifida with hydrocephalus           |
| 15931          | Q05.5       | Cervical spina bifida without hydrocephalus                              |
| 15932          | Q05.6       | Thoracic spina bifida without hydrocephalus                              |
| 15933          | Q05.7       | Lumbar spina bifida without hydrocephalus                                |
| 15934          | Q05.8       | Sacral spina bifida without hydrocephalus                                |
| 15935          | Q05.9       | Spina bifida (unknown or unspecified cause)                              |
| 10986          | Q05.9a      | Spina bifida                                                             |
| 10704          | Q05.9b      | Myelomeningocele (specify site)                                          |
| 15936          | Q05.X       | Spina bifida                                                             |
| 16024          | Q20.0       | Common arterial trunk (Truncus malformation)                             |
| 10356          | Q20.1       | Double outlet right ventricle (DORV)                                     |
| 16025          | Q20.1       | Double outlet right ventricle (DORV)                                     |
| 16026          | Q20.2       | Double outlet left ventricle (DOLV)                                      |
| 11070          | Q20.3       | Transposition of the great vessels (TGA)                                 |
| 16027          | Q20.3       | Transposition great arteries (TGA)                                       |
| 16028          | Q20.4       | Double inlet ventricle (DILV)                                            |
| 16029          | Q20.5       | Discordant atrioventricular connection                                   |
| 16030          | Q20.6       | Isomerism of atrial appendages                                           |
| 16031          | Q20.8       | Other congenital malformations of cardiac chambers and connections       |
| 16032          | Q20.9       | Congenital malformations of cardiac chambers and connections unspecified |
| 16033          | Q20.X       | Congenital malformations of cardiac chambers and connections             |
| 16035          | Q20.91      | Atrium single                                                            |
| 16036          | Q20.92      | Ventricle single                                                         |
| 10097          | Q21.2       | Atrio-ventricular septal defect (AVSD)                                   |
| 16039          | Q21.2       | Atrioventricular septal defect (AVSD)                                    |
| 11043          | Q21.3       | Tetralogy of Fallot                                                      |
| 16040          | Q21.3       | Tetralogy of Fallot                                                      |

|       |        |                                                                           |
|-------|--------|---------------------------------------------------------------------------|
| 16045 | Q22.0  | Pulmonary valve atresia                                                   |
| 16046 | Q22.1  | Congenital pulmonary valve stenosis                                       |
| 16047 | Q22.2  | Congenital pulmonary valve insufficiency                                  |
| 16048 | Q22.3  | Other congenital malformations of pulmonary valve                         |
| 16049 | Q22.4  | Congenital tricuspid atresia / stenosis                                   |
| 16050 | Q22.5  | Ebstein's anomaly                                                         |
| 16051 | Q22.6  | Hypoplastic right heart syndrome                                          |
| 16052 | Q22.8  | Other congenital malformations of tricuspid valve                         |
| 16053 | Q22.9  | Congenital malformation of tricuspid valve (unknown or unspecified cause) |
| 16054 | Q22.X  | Congenital malformations of pulmonary and tricuspid valves                |
| 16055 | Q23.0  | Congenital stenosis of aortic valve (AS)                                  |
| 16056 | Q23.1  | Congenital insufficiency of aortic valve                                  |
| 16057 | Q23.2  | Congenital mitral stenosis (MS)                                           |
| 16058 | Q23.3  | Mitral atresia                                                            |
| 16059 | Q23.4  | Hypoplastic left heart syndrome (HLH)                                     |
| 16060 | Q23.8  | Other congenital malformations of aortic and mitral valves                |
| 16061 | Q23.9  | Congenital malformation of aortic and mitral valves unspec                |
| 16062 | Q23.X  | Congenital malformations of aortic and mitral valves                      |
| 16079 | Q25.1  | Coarctation of aorta                                                      |
| 10227 | Q25.19 | Coarctation of the aorta                                                  |
| 16080 | Q25.2  | Hypoplasia of aortic arch                                                 |
| 16081 | Q25.3  | Stenosis of aorta (AS)                                                    |
| 16082 | Q25.4  | Malformation of aorta                                                     |
| 16083 | Q25.5  | Atresia of pulmonary artery                                               |
| 16084 | Q25.6  | Stenosis of pulmonary artery (PS)                                         |
| 16086 | Q25.8  | Other congenital malformations of great arteries                          |
| 16087 | Q25.8  | Transposition of the great vessels (TGA)                                  |
| 11057 | Q26.2  | Total anomalous pulmonary venous drainage (TAPVD)                         |
| 16092 | Q26.2  | Total anomalous pulmonary venous connection (TAPVD)                       |
| 16154 | Q33.6  | Hypoplasia and dysplasia of lung                                          |
| 16241 | Q44.2  | Atresia of bile ducts                                                     |
| 10123 | Q60.1  | Bilateral renal agenesis                                                  |
| 16318 | Q60.1B | Renal agenesis, bilateral                                                 |
| 16324 | Q60.6  | Potter's syndrome                                                         |
| 16327 | Q61.1  | Polycystic kidney, infantile type                                         |
| 10100 | Q61.1a | Autosomal recessive polycystic kidney - infantile                         |
| 10367 | Q64.1  | Ectopia vesicae                                                           |
| 16356 | Q64.1  | Exstrophy of urinary bladder                                              |
| 10854 | Q64.2  | Posterior urethral valves (PUV)                                           |
| 16357 | Q64.2  | Congenital posterior urethral valves (PUV)                                |
| 16360 | Q64.5  | Congenital absence of bladder and urethra                                 |
| 10008 | Q64.5a | Absence of bladder                                                        |
| 10236 | Q64.5b | Congenital absence of urethra                                             |
| 16475 | Q77.1  | Thanatophoric short stature                                               |

|       |        |                                                  |
|-------|--------|--------------------------------------------------|
| 10246 | Q79.0  | Congenital diaphragmatic hernia                  |
| 10490 | Q79.0  | Hernia into the cord                             |
| 16495 | Q79.0  | Congenital diaphragmatic hernia                  |
| 16496 | Q79.1A | Aplasia of diaphragm                             |
| 16497 | Q79.1E | Eventration of diaphragm                         |
| 16498 | Q79.2  | Exomphalos                                       |
| 10395 | Q79.2  | Exomphalos                                       |
| 16499 | Q79.3  | Gastroschisis                                    |
| 16589 | Q90.0  | Trisomy 21, meiotic nondisjunction               |
| 16590 | Q90.1  | Trisomy 21, mosaicism (mitotic nondisjunction)   |
| 16591 | Q90.2  | Trisomy 21, translocation                        |
| 16592 | Q90.9  | Down's syndrome (unknown or unspecified cause)   |
| 16593 | Q90.X  | Down's syndrome                                  |
| 16594 | Q91.0  | Trisomy 18, meiotic nondisjunction               |
| 16595 | Q91.1  | Trisomy 18, mosaicism (mitotic nondisjunction)   |
| 16596 | Q91.2  | Trisomy 18, translocation                        |
| 16597 | Q91.3  | Edwards' syndrome (unknown or unspecified cause) |
| 16598 | Q91.4  | Trisomy 13, meiotic nondisjunction               |
| 16599 | Q91.5  | Trisomy 13, mosaicism (mitotic nondisjunction)   |
| 16600 | Q91.6  | Trisomy 13, translocation                        |
| 16601 | Q91.7  | Patau's syndrome (unknown or unspecified cause)  |
| 16602 | Q91.X  | Edwards' syndrome and Patau's syndrome           |

Supplementary Table 2 Congenital anomalies
